# Supplementary material
Source: PubMed Central journal article supplement (PMC6280956)
Supplement: dyy177_supplementary_material.pdf [file dyy177_supplementary_material.pdf]

# Supplementary Material to: Genetic Determinants of Height and Cardiometabolic Traits in the Hispanic Community Health Study/Study of Latinos

Tamar Sofer\*, Jee-Young Moon\*, Carmen R. Isasi, Qibin Qi,  
Neomi A. Shah, Robert C. Kaplan, Mark H. Kuniholm

## Contents

|          |                                                                                                                |          |
|----------|----------------------------------------------------------------------------------------------------------------|----------|
| <b>1</b> | <b>Supplementary methods</b>                                                                                   | <b>1</b> |
| <b>2</b> | <b>Supplementary figures</b>                                                                                   | <b>2</b> |
| <b>3</b> | <b>Supplementary tables</b>                                                                                    | <b>7</b> |
| 3.1      | Associations of the PRSs and of height with cardiometabolic traits in men and women, and<br>combined . . . . . | 7        |
| 3.2      | The variants composing PRS1 and PRS2 . . . . .                                                                 | 11       |

## 1 Supplementary methods

To identify “lead SNPs” in HCHS/SOL for calculation of PRS2, we first defined a genomic region of  $5 \times 10^5$  base pairs around each of the 804 previously reported height-associated SNPs (see Methods in main text). Then, we used the results of a currently-underway GWAS of height in HCHS/SOL to identify the SNP or indel with the strongest height association in the defined genomic region. The first phase (discovery phase) of this currently-underway GWAS of height in HCHS/SOL used the MetaCor framework (?) because we have shown that stratified (by genetic analysis group (i.e., heritage group)) analysis followed by meta-analysis is useful in studies with heterogeneous sub-strata, particularly when both allele frequencies and trait distributions may differ between strata. Analyses of this currently-underway GWAS used mixed-models with adjustment for age, sex, study-center, nativity, HCHS/SOL sampling weights,

PCs of ancestry and random effects for kinship, household, and community block unit.

## 2 Supplementary figures

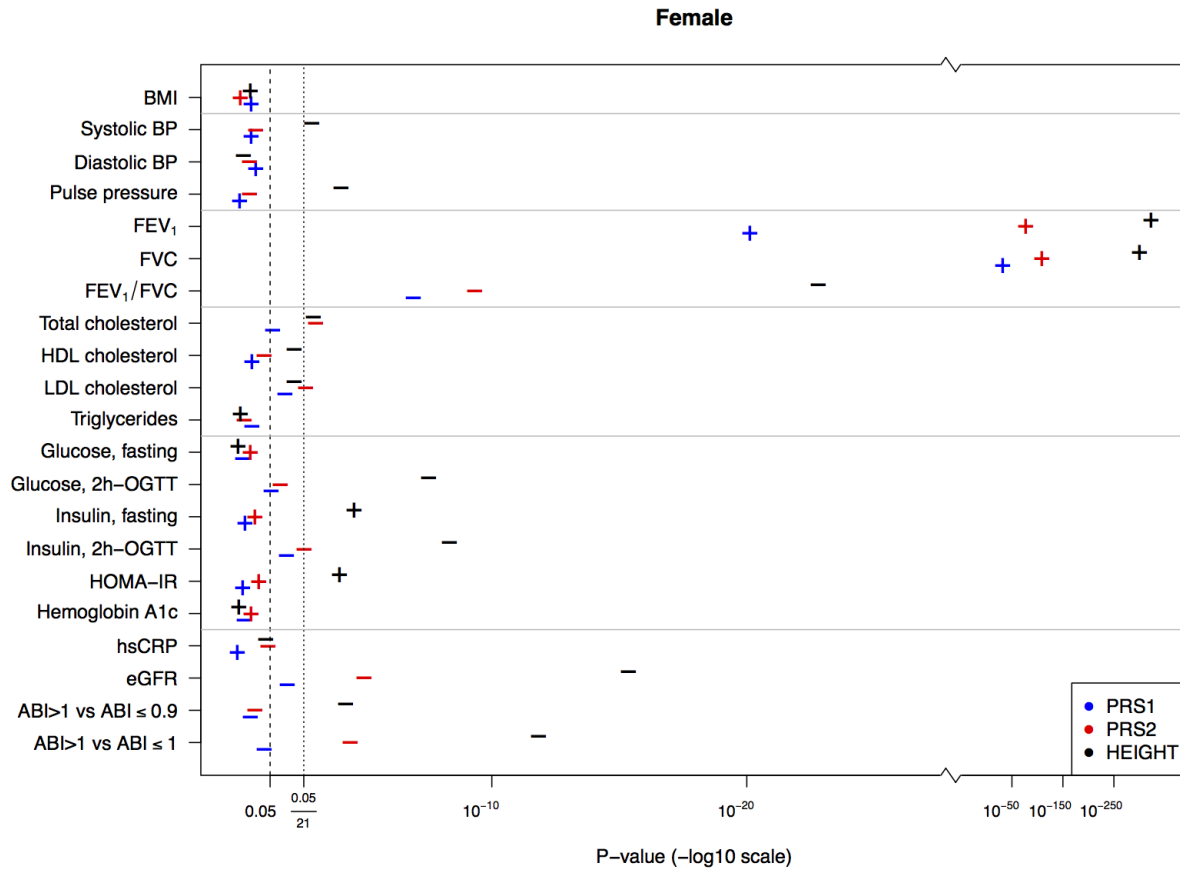

Supplementary figure 1: **Women-only associations.** Significance level for associations of PRS1 (estimated from prior GWAS of European, African and Asian populations), PRS2 (created to predict adult height in Hispanics/Latinos) and measured height with cardiometabolic traits in HCHS/SOL women. Effects are for a one (1) standard deviation (SD) increase in PRS1, PRS2, or measured height. Plus (+) symbols indicate a positive association and minus (-) symbols indicate an inverse association. Two significance level cutoff lines are shown: the nominal level (0.05) and the Bonferroni-corrected significance level (0.05/21 cardiometabolic traits).

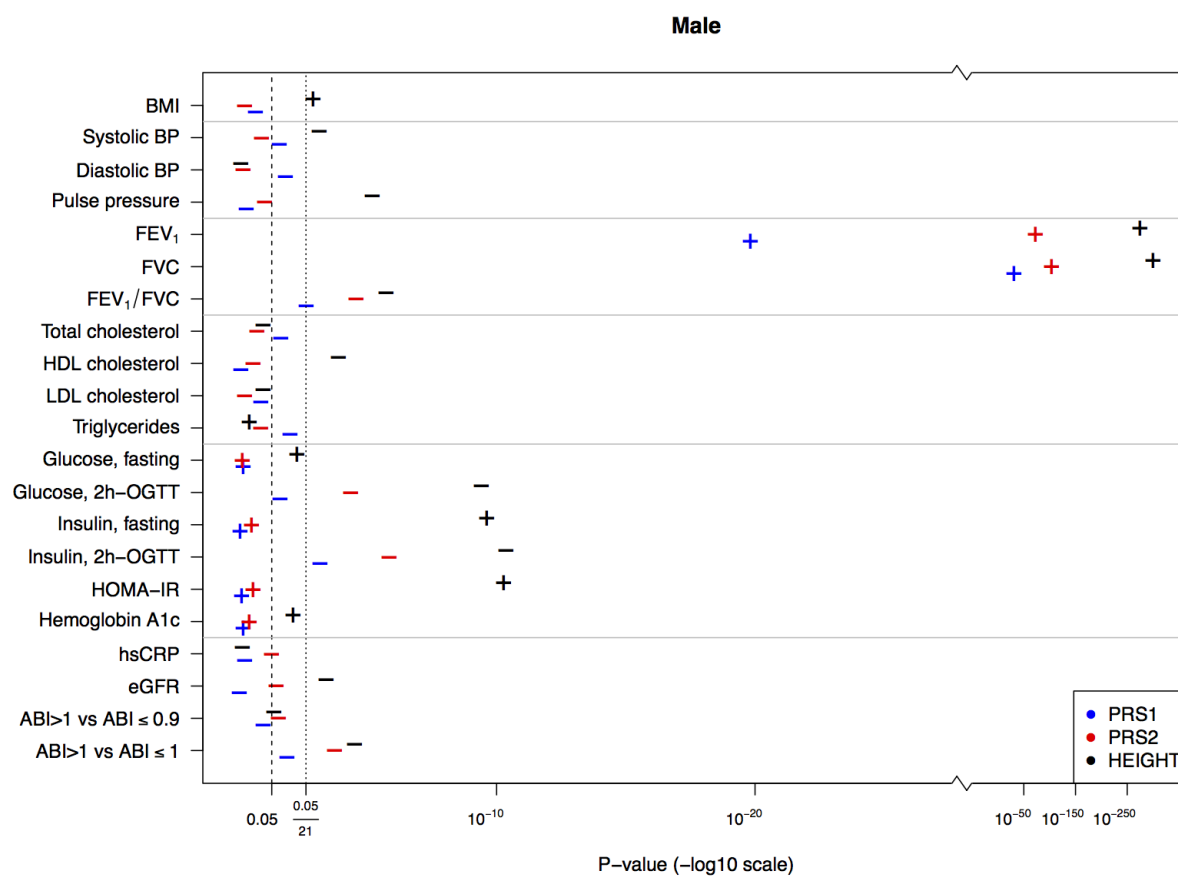

Supplementary figure 2: **Men-only associations.** Significance level for associations of PRS1 (estimated from prior GWAS of European, African and Asian populations), PRS2 (created to predict adult height in Hispanics/Latinos) and measured height with cardiometabolic traits in HCHS/SOL men. Effects are for a one (1) standard deviation (SD) increase in PRS1, PRS2, or measured height. Plus (+) symbols indicate a positive association and minus (-) symbols indicate an inverse association. Two significance level cutoff lines are shown: the nominal level (0.05) and the Bonferroni-corrected significance level ( $0.05/21$  cardiometabolic traits).

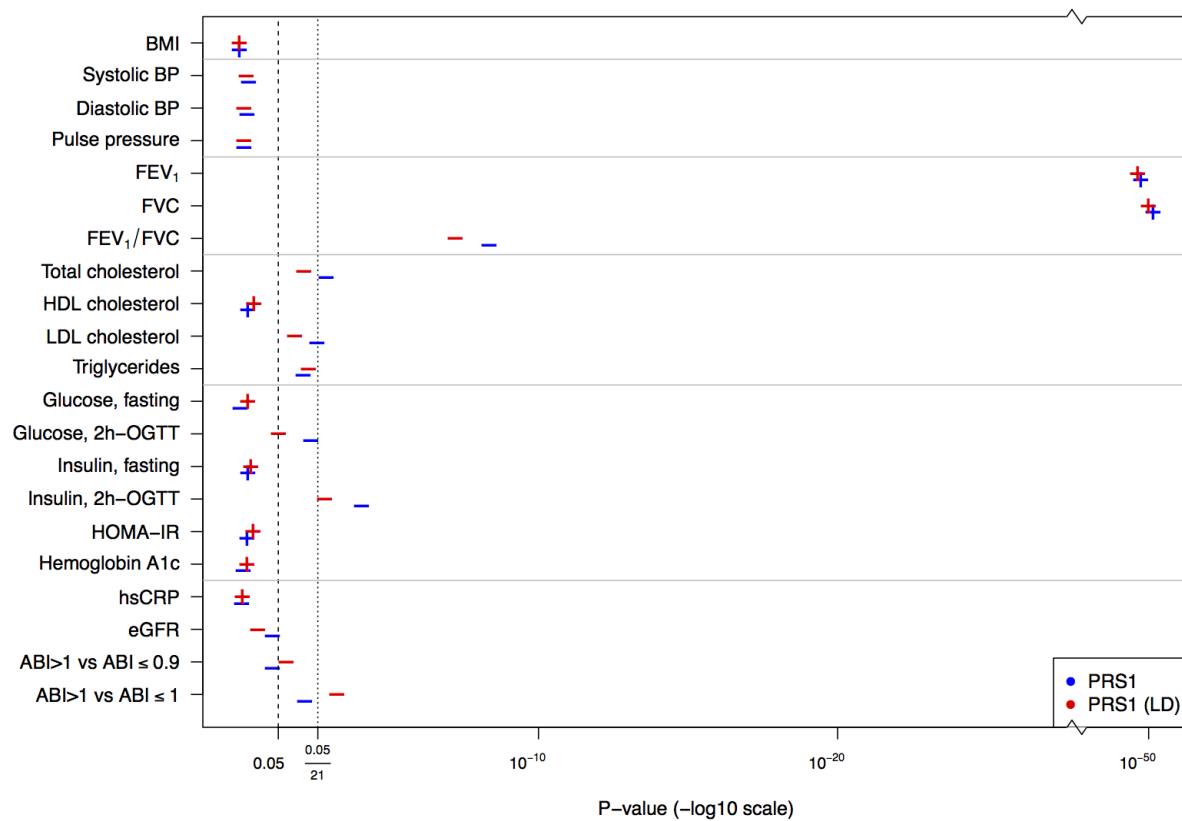

Supplementary figure 3: **LD-pruned PRS1 versus primary PRS1**. Significance level for associations of PRS1 (estimated from prior GWAS of European, African and Asian populations), LD-pruned PRS1 (75 SNPs removed so that of the remaining SNPs, the LD  $r^2$  between each pair of SNPs is  $\leq 0.5$ ) with cardiometabolic traits in the HCHS/SOL. Effects are for a one (1) standard deviation (SD) increase in each PRS. Plus (+) symbols indicate a positive association and minus (-) symbols indicate an inverse association. Two significance level cutoff lines are shown: the nominal level (0.05) and the Bonferroni-corrected significance level (0.05/21 cardiometabolic traits).

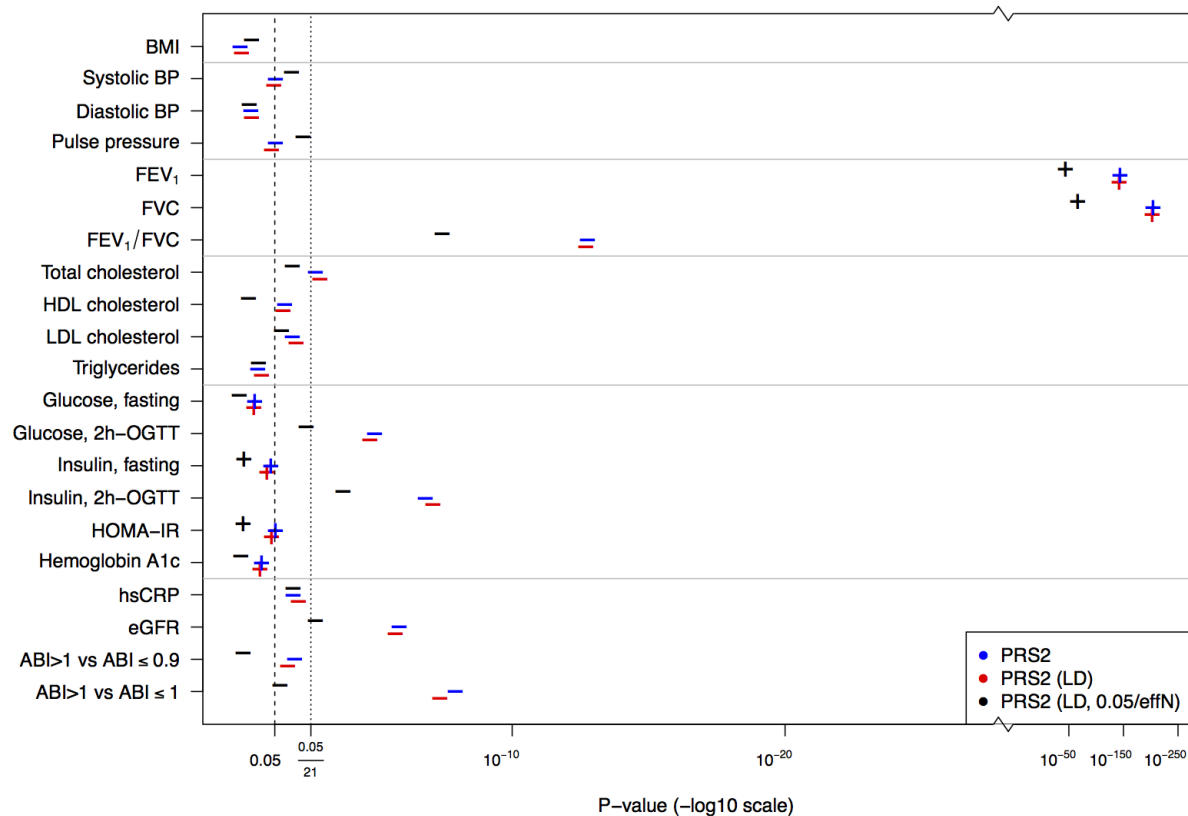

Supplementary figure 4: **LD-pruned and multiple testing adjusted PRS versus primary PRS2.** Significance level for associations of PRS2 (created to predict adult height in Hispanics/Latinos), LD-pruned PRS2 (7 SNPs removed so that of the remaining SNPs, the LD  $r^2$  between each pair of SNPs is  $\leq 0.5$ ), and a PRS adjusted for multiple testing (SNPs are used only if their  $p$ -values are  $\leq 0.05/\text{effSNP}$ , the effective number of SNPs in the genomic region) with cardiometabolic traits in the HCHS/SOL. Effects are for a one (1) standard deviation (SD) increase in each PRS. Plus (+) symbols indicate a positive association and minus (-) symbols indicate an inverse association. Two significance level cutoff lines are shown: the nominal level (0.05) and the Bonferroni-corrected significance level ( $0.05/21$  cardiometabolic traits).

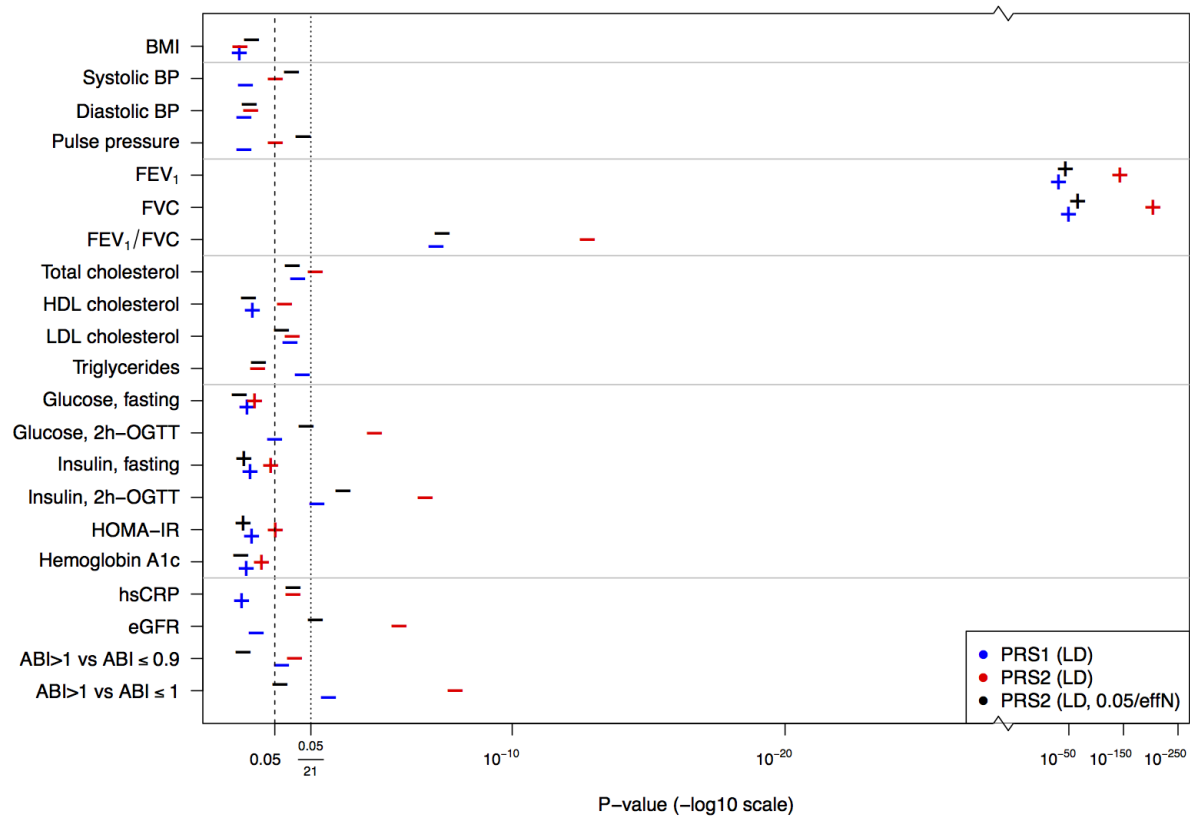

Supplementary figure 5: **Sensitivity analyses associations.** Significance level for associations of LD-pruned PRS1, PRS2, and PRS2 adjusted for multiple testing, with cardiometabolic traits in the HCHS/SOL. Effects are for a one (1) standard deviation (SD) increase in each PRS. Plus (+) symbols indicate a positive association and minus (-) symbols indicate an inverse association. Two significance level cutoff lines are shown: the nominal level (0.05) and the Bonferroni-corrected significance level (0.05/21 cardiometabolic traits).

### 3 Supplementary tables

#### 3.1 Associations of the PRSs and of height with cardiometabolic traits in men and women, and combined

Supplementary tables 1 and 2 provides effect size estimates and 95% confidence intervals from association analysis of PRS1, PRS2, and height with the cardiometabolic traits, in strata of HCHS/SOL men and women, respectively. Supplementary table 3 provides the same results for the analysis of the combined cohort. All association models were adjusted for age and 5 principal components (PCs) of genomic race/ethnicity to prevent biases due to population stratification. To account for the HCHS/SOL sampling design that included genetically related individuals and individuals living in the same household and community block unit, we used linear or logistic mixed models (for quantitative and binary traits, respectively), with correlations modeled via kinship, household sharing, and community block unit sharing matrices.

| Trait                                                  | Sample size | PRS1                          |         | PRS2                          |         | Height                        |         |
|--------------------------------------------------------|-------------|-------------------------------|---------|-------------------------------|---------|-------------------------------|---------|
|                                                        |             | Effects (95% CI) <sup>a</sup> | P-value | Effects (95% CI) <sup>a</sup> | P-value | Effects (95% CI) <sup>a</sup> | P-value |
| <b>Anthropometry</b>                                   |             |                               |         |                               |         |                               |         |
| BMI                                                    | 5229        | -0.1 (-0.25,0.06)             | 0.214   | -0.04 (-0.19,0.1)             | 0.565   | 0.34 (0.13,0.55)              | 0.001   |
| <b>Blood pressure</b>                                  |             |                               |         |                               |         |                               |         |
| Systolic BP                                            | 5242        | -0.48 (-0.89,-0.06)           | 0.025   | -0.31 (-0.71,0.08)            | 0.123   | -1 (-1.6,-0.4)                | 0.001   |
| Diastolic BP                                           | 5239        | -0.37 (-0.67,-0.07)           | 0.015   | -0.07 (-0.35,0.22)            | 0.638   | -0.06 (-0.48,0.36)            | 0.773   |
| Pulse pressure                                         | 5239        | -0.11 (-0.4,0.19)             | 0.480   | -0.24 (-0.52,0.04)            | 0.094   | -0.95 (-1.36,-0.54)           | < 0.001 |
| <b>Lung function</b>                                   |             |                               |         |                               |         |                               |         |
| FEV1                                                   | 4896        | 79.1 (62.4,95.8)              | < 0.001 | 143.4 (127.8,159)             | < 0.001 | 377 (356.2,397.9)             | < 0.001 |
| FVC                                                    | 4896        | 119.9 (99.7,140.1)            | < 0.001 | 207.2 (188.5,225.9)           | < 0.001 | 520 (495.6,544.3)             | < 0.001 |
| FEV1/FVC                                               | 4878        | -0.31 (-0.51,-0.11)           | 0.002   | -0.41 (-0.6,-0.22)            | < 0.001 | -0.68 (-0.96,-0.4)            | < 0.001 |
| <b>Lipid measures</b>                                  |             |                               |         |                               |         |                               |         |
| Total cholesterol                                      | 5242        | -1.4 (-2.7,-0.2)              | 0.023   | -0.8 (-2,0.4)                 | 0.183   | -1.4 (-3.1,0.3)               | 0.110   |
| HDL cholesterol                                        | 5241        | -0.05 (-0.38,0.29)            | 0.787   | -0.18 (-0.5,0.13)             | 0.259   | -0.9 (-1.36,-0.44)            | < 0.001 |
| LDL cholesterol                                        | 5067        | -0.8 (-1.8,0.3)               | 0.137   | -0.3 (-1.3,0.7)               | 0.576   | -1.2 (-2.6,0.3)               | 0.109   |
| Triglycerides                                          | 5242        | -0.021 (-0.037,-0.005)        | 0.010   | -0.012 (-0.027,0.004)         | 0.130   | 0.01 (-0.012,0.033)           | 0.365   |
| <b>Glycemic traits</b>                                 |             |                               |         |                               |         |                               |         |
| Glucose, fasting                                       | 5242        | 0.3 (-0.8,1.4)                | 0.627   | 0.2 (-0.8,1.3)                | 0.665   | 2.2 (0.6,3.7)                 | 0.005   |
| Glucose, 2h-OGTT                                       | 4346        | -1.4 (-2.7,-0.2)              | 0.024   | -2.5 (-3.6,-1.3)              | < 0.001 | -5.5 (-7.2,-3.8)              | < 0.001 |
| Insulin, fasting                                       | 5219        | 0.002 (-0.019,0.022)          | 0.865   | 0.01 (-0.009,0.03)            | 0.298   | 0.093 (0.064,0.122)           | < 0.001 |
| Insulin, 2h-OGTT                                       | 4333        | -0.05 (-0.079,-0.021)         | 0.001   | -0.068 (-0.095,-0.04)         | < 0.001 | -0.136 (-0.177,-0.096)        | < 0.001 |
| HOMA-IR                                                | 5218        | 0.004 (-0.019,0.026)          | 0.752   | 0.012 (-0.009,0.034)          | 0.267   | 0.106 (0.074,0.137)           | < 0.001 |
| Hemoglobin A1c                                         | 5224        | 0.002 (-0.005,0.009)          | 0.624   | 0.003 (-0.004,0.01)           | 0.382   | 0.014 (0.004,0.024)           | 0.008   |
| <b>Inflammation, kidney, peripheral artery disease</b> |             |                               |         |                               |         |                               |         |
| hsCRP                                                  | 5241        | -0.009 (-0.038,0.021)         | 0.567   | -0.028 (-0.056,0)             | 0.051   | -0.009 (-0.05,0.032)          | 0.673   |
| eGFR                                                   | 5196        | -0.03 (-0.47,0.41)            | 0.897   | -0.45 (-0.87,-0.03)           | 0.035   | -1.1 (-1.7,-0.5)              | < 0.001 |
|                                                        |             | OR (95% CI) <sup>a</sup>      | P-value | OR (95% CI) <sup>a</sup>      | P-value | OR (95% CI) <sup>a</sup>      | P-value |
| ABI> 1 vs ABI ≤ 0.9                                    | 2556        | 0.85 (0.71,1.04)              | 0.108   | 0.81 (0.68,0.98)              | 0.028   | 0.75 (0.57,0.99)              | 0.042   |
| ABI> 1 vs ABI ≤ 1                                      | 2872        | 0.87 (0.79,0.97)              | 0.013   | 0.83 (0.75,0.91)              | < 0.001 | 0.73 (0.63,0.84)              | < 0.001 |

Supplementary table 1: **Associations of PRS1, PRS2, and measured height with cardiometabolic traits in HCHS/SOL men.** PRS: genetic risk score; CI: confidence interval; BMI: body mass index; FEV1: forced expiratory volume in 1 second; FVC: forced vital capacity; HDL: high-density lipoprotein; LDL: low-density lipoprotein; 2h-OGTT: 2-h post-oral glucose tolerance test; HOMA-IR: homeostatic model assessment of insulin resistance; hsCRP: high sensitivity C-reactive protein; eGFR: estimated glomerular filtration rate; OR: odds ratio.

<sup>a</sup> Effects are for a one (1) standard deviation (SD) increase in PRS1, PRS2, or measured height.



| Trait                                                  | Sample size | PRS1                          |         | PRS2                          |         | Height                        |         |
|--------------------------------------------------------|-------------|-------------------------------|---------|-------------------------------|---------|-------------------------------|---------|
|                                                        |             | Effects (95% CI) <sup>a</sup> | P-value | Effects (95% CI) <sup>a</sup> | P-value | Effects (95% CI) <sup>a</sup> | P-value |
| <b>Anthropometry</b>                                   |             |                               |         |                               |         |                               |         |
| BMI                                                    | 7521        | 0.08 (-0.07,0.23)             | 0.272   | 0.03 (-0.12,0.18)             | 0.710   | 0.12 (-0.11,0.36)             | 0.300   |
| <b>Blood pressure</b>                                  |             |                               |         |                               |         |                               |         |
| Systolic BP                                            | 7534        | 0.21 (-0.16,0.58)             | 0.273   | -0.25 (-0.62,0.12)            | 0.186   | -1 (-1.5,-0.4)                | 0.001   |
| Diastolic BP                                           | 7531        | 0.16 (-0.08,0.4)              | 0.183   | -0.12 (-0.36,0.12)            | 0.320   | -0.12 (-0.48,0.25)            | 0.539   |
| Pulse pressure                                         | 7531        | 0.04 (-0.23,0.3)              | 0.778   | -0.13 (-0.4,0.13)             | 0.327   | -0.83 (-1.24,-0.42)           | < 0.001 |
| <b>Lung function</b>                                   |             |                               |         |                               |         |                               |         |
| FEV1                                                   | 6930        | 46.4 (36.7,56.1)              | < 0.001 | 91.5 (81.9,101.1)             | < 0.001 | 272.4 (258.5,286.3)           | < 0.001 |
| FVC                                                    | 6930        | 71.5 (59.7,83.2)              | < 0.001 | 130.9 (119.3,142.4)           | < 0.001 | 383 (366.8,399.3)             | < 0.001 |
| FEV1/FVC                                               | 6890        | -0.39 (-0.54,-0.25)           | < 0.001 | -0.46 (-0.61,-0.32)           | < 0.001 | -1.16 (-1.39,-0.93)           | < 0.001 |
| <b>Lipid measures</b>                                  |             |                               |         |                               |         |                               |         |
| Total cholesterol                                      | 7534        | -1 (-1.9,0)                   | 0.040   | -1.6 (-2.5,-0.7)              | 0.001   | -2.4 (-3.9,-1)                | 0.001   |
| HDL cholesterol                                        | 7534        | 0.17 (-0.13,0.48)             | 0.261   | -0.27 (-0.57,0.03)            | 0.083   | -0.67 (-1.14,-0.19)           | 0.006   |
| LDL cholesterol                                        | 7445        | -1 (-1.8,-0.2)                | 0.013   | -1.3 (-2.1,-0.5)              | 0.002   | -1.8 (-3,-0.5)                | 0.005   |
| Triglycerides                                          | 7534        | -0.007 (-0.018,0.005)         | 0.251   | -0.004 (-0.015,0.008)         | 0.514   | 0.003 (-0.015,0.021)          | 0.735   |
| <b>Glycemic traits</b>                                 |             |                               |         |                               |         |                               |         |
| Glucose, fasting                                       | 7533        | -0.2 (-1,0.6)                 | 0.584   | 0.4 (-0.4,1.2)                | 0.294   | 0.1 (-1.2,1.3)                | 0.917   |
| Glucose, 2h-OGTT                                       | 6147        | -1 (-2,0)                     | 0.047   | -1.2 (-2.2,-0.2)              | 0.020   | -4.4 (-6,-2.9)                | < 0.001 |
| Insulin, fasting                                       | 7518        | 0.006 (-0.01,0.021)           | 0.473   | 0.01 (-0.005,0.026)           | 0.196   | 0.052 (0.028,0.076)           | < 0.001 |
| Insulin, 2h-OGTT                                       | 6143        | -0.025 (-0.045,-0.006)        | 0.011   | -0.03 (-0.05,-0.011)          | 0.002   | -0.091 (-0.122,-0.061)        | < 0.001 |
| HOMA-IR                                                | 7518        | 0.005 (-0.013,0.022)          | 0.582   | 0.013 (-0.004,0.03)           | 0.142   | 0.054 (0.027,0.081)           | < 0.001 |
| Hemoglobin A1c                                         | 7507        | -0.002 (-0.007,0.003)         | 0.518   | 0.003 (-0.002,0.008)          | 0.279   | 0.001 (-0.007,0.009)          | 0.841   |
| <b>Inflammation, kidney, peripheral artery disease</b> |             |                               |         |                               |         |                               |         |
| hsCRP                                                  | 7533        | 0.001 (-0.025,0.026)          | 0.958   | -0.025 (-0.05,0.001)          | 0.059   | -0.036 (-0.076,0.003)         | 0.074   |
| eGFR                                                   | 7491        | -0.45 (-0.8,-0.1)             | 0.011   | -0.78 (-1.13,-0.43)           | < 0.001 | -2.2 (-2.8,-1.7)              | < 0.001 |
|                                                        |             | OR (95% CI) <sup>a</sup>      | P-value | OR (95% CI) <sup>a</sup>      | P-value | OR (95% CI) <sup>a</sup>      | P-value |
| ABI> 1 vs ABI ≤ 0.9                                    | 3558        | 0.94 (0.83,1.06)              | 0.303   | 0.92 (0.81,1.04)              | 0.195   | 0.66 (0.53,0.81)              | < 0.001 |
| ABI> 1 vs ABI ≤ 1                                      | 4619        | 0.94 (0.88,1.01)              | 0.086   | 0.87 (0.81,0.93)              | < 0.001 | 0.67 (0.61,0.75)              | < 0.001 |

Supplementary table 2: **Associations of PRS1, PRS2, and measured height with cardiometabolic traits in HCHS/SOL women.** PRS: genetic risk score; CI: confidence interval; BMI: body mass index; FEV1: forced expiratory volume in 1 second; FVC: forced vital capacity; HDL: high-density lipoprotein; LDL: low-density lipoprotein; 2h-OGTT: 2-h post-oral glucose tolerance test; HOMA-IR: homeostatic model assessment of insulin resistance; hsCRP: high sensitivity C-reactive protein; eGFR: estimated glomerular filtration rate; OR: odds ratio.

<sup>a</sup> Effects are for a one (1) standard deviation (SD) increase in PRS1, PRS2, or measured height.

| Trait                                                  | Sample size | PRS1                          |         | PRS2                          |         | Height                        |         |
|--------------------------------------------------------|-------------|-------------------------------|---------|-------------------------------|---------|-------------------------------|---------|
|                                                        |             | Effects (95% CI) <sup>a</sup> | P-value | Effects (95% CI) <sup>a</sup> | P-value | Effects (95% CI) <sup>a</sup> | P-value |
| <b>Anthropometry</b>                                   |             |                               |         |                               |         |                               |         |
| BMI                                                    | 12750       | 0 (-0.11,0.11)                | 0.999   | -0.01 (-0.12,0.09)            | 0.807   | 0.21 (0.05,0.37)              | 0.010   |
| <b>Blood pressure</b>                                  |             |                               |         |                               |         |                               |         |
| Systolic BP                                            | 12776       | -0.1 (-0.38,0.18)             | 0.503   | -0.27 (-0.54,0.01)            | 0.056   | -1 (-1.42,-0.58)              | < 0.001 |
| Diastolic BP                                           | 12770       | -0.06 (-0.24,0.13)            | 0.564   | -0.08 (-0.27,0.1)             | 0.365   | -0.07 (-0.35,0.21)            | 0.605   |
| Pulse pressure                                         | 12770       | -0.04 (-0.24,0.16)            | 0.715   | -0.19 (-0.38,0.01)            | 0.064   | -0.91 (-1.21,-0.61)           | < 0.001 |
| <b>Lung function</b>                                   |             |                               |         |                               |         |                               |         |
| FEV1                                                   | 11826       | 58.7 (49.6,67.7)              | < 0.001 | 113.7 (104.9,122.5)           | < 0.001 | 319.7 (307.5,331.8)           | < 0.001 |
| FVC                                                    | 11826       | 89.5 (78.6,100.4)             | < 0.001 | 163 (152.5,173.5)             | < 0.001 | 444.9 (430.6,459.1)           | < 0.001 |
| FEV1/FVC                                               | 11768       | -0.36 (-0.48,-0.24)           | < 0.001 | -0.44 (-0.56,-0.33)           | < 0.001 | -0.94 (-1.11,-0.76)           | < 0.001 |
| <b>Lipid measures</b>                                  |             |                               |         |                               |         |                               |         |
| Total cholesterol                                      | 12776       | -1.2 (-2,-0.5)                | 0.001   | -1.2 (-2,-0.5)                | 0.001   | -2 (-3.1,-0.8)                | 0.001   |
| HDL cholesterol                                        | 12775       | 0.08 (-0.15,0.3)              | 0.515   | -0.26 (-0.48,-0.03)           | 0.025   | -0.85 (-1.18,-0.51)           | < 0.001 |
| LDL cholesterol                                        | 12512       | -1 (-1.6,-0.4)                | 0.003   | -0.9 (-1.5,-0.2)              | 0.008   | -1.5 (-2.4,-0.5)              | 0.002   |
| Triglycerides                                          | 12776       | -0.013 (-0.022,-0.003)        | 0.007   | -0.007 (-0.016,0.003)         | 0.156   | 0.007 (-0.008,0.021)          | 0.365   |
| <b>Glycemic traits</b>                                 |             |                               |         |                               |         |                               |         |
| Glucose, fasting                                       | 12775       | 0 (-0.7,0.6)                  | 0.930   | 0.3 (-0.3,1)                  | 0.297   | 1 (0,1.9)                     | 0.043   |
| Glucose, 2h-OGTT                                       | 10493       | -1.2 (-1.9,-0.4)              | 0.004   | -1.7 (-2.5,-0.9)              | < 0.001 | -4.9 (-6.1,-3.7)              | < 0.001 |
| Insulin, fasting                                       | 12737       | 0.004 (-0.009,0.017)          | 0.531   | 0.01 (-0.002,0.023)           | 0.097   | 0.07 (0.052,0.089)            | < 0.001 |
| Insulin, 2h-OGTT                                       | 10476       | -0.034 (-0.05,-0.017)         | < 0.001 | -0.045 (-0.061,-0.029)        | < 0.001 | -0.11 (-0.135,-0.085)         | < 0.001 |
| HOMA-IR                                                | 12736       | 0.004 (-0.01,0.018)           | 0.553   | 0.013 (-0.001,0.026)          | 0.067   | 0.077 (0.057,0.098)           | < 0.001 |
| Hemoglobin A1c                                         | 12731       | -7e-04 (-0.0049,0.0035)       | 0.743   | 0.0029 (-0.0013,0.007)        | 0.177   | 0.006 (0,0.013)               | 0.049   |
| <b>Inflammation, kidney, peripheral artery disease</b> |             |                               |         |                               |         |                               |         |
| hsCRP                                                  | 12774       | -0.002 (-0.021,0.018)         | 0.852   | -0.026 (-0.045,-0.007)        | 0.007   | -0.024 (-0.053,0.005)         | 0.103   |
| eGFR                                                   | 12687       | -0.25 (-0.52,0.03)            | 0.077   | -0.66 (-0.93,-0.39)           | < 0.001 | -1.68 (-2.09,-1.27)           | < 0.001 |
|                                                        |             | OR (95% CI) <sup>a</sup>      | P-value | OR (95% CI) <sup>a</sup>      | P-value | OR (95% CI) <sup>a</sup>      | P-value |
| ABI> 1 vs ABI ≤ 0.9                                    | 6114        | 0.91 (0.82,1.01)              | 0.077   | 0.88 (0.8,0.98)               | 0.017   | 0.69 (0.59,0.81)              | < 0.001 |
| ABI> 1 vs ABI ≤ 1                                      | 7491        | 0.92 (0.87,0.98)              | 0.006   | 0.855 (0.809,0.904)           | < 0.001 | 0.69 (0.63,0.76)              | < 0.001 |

Supplementary table 3: **Associations of PRS1, PRS2, and measured height with cardiometabolic traits in the HCHS/SOL** (men and women combined). PRS: polygenic risk score; CI: confidence interval; BMI: body mass index; FEV1: forced expiratory volume in 1 second; FVC: forced vital capacity; HDL: high-density lipoprotein; LDL: low-density lipoprotein; 2h-OGTT: 2-h post-oral glucose tolerance test; HOMA-IR: homeostatic model assessment of insulin resistance; hsCRP: high sensitivity C-reactive protein; eGFR: estimated glomerular filtration rate; OR: odds ratio.

<sup>a</sup> Effects are for a one (1) standard deviation (SD) increase in PRS1, PRS2, or measured height.

### 3.2 The variants composing PRS1 and PRS2

Variants composing PRS1 were (1) 697 SNPs that reached genome-wide significance ( $P < 5 \times 10^{-8}$ ) in a GWAS meta-analysis of adult height from 79 studies consisting of 253,288 individuals of European ancestry (?), (2) 71 SNPs that reached genome-wide significance in GWAS meta-analyses of adult height in 93,926 individuals from East Asia (?), and (3) 36 SNPs identified in a study of 20,427 individuals of African ancestry (?). Variants composing PRS2 were lead variants in the HCHS/SOL in 500Kbp regions around the SNPs identified in the previous, discovery, studies.

Supplementary table 4: Previously reported height SNPs composing GRS1. Position is given in genome build 37. A1 is the reported trait-increasing allele, A2 is the other allele. A1-freq, effects, and SEs, are given in the previously reported discovery study (dscvr) and in the HCHS/SOL. Ethnicity (dscvr) is that of the previously reported study population. Provided imputation info scores are in the HCHS/SOL.

| SNP        | Chr | position | A1 | A2 | A1-freq<br>(dscvr) | Effect-SE<br>(dscvr)         | ethnicity<br>(dscvr) | A1-freq (SOL) | Effect-SE<br>(SOL) | Info |
|------------|-----|----------|----|----|--------------------|------------------------------|----------------------|---------------|--------------------|------|
| rs425277   | 1   | 2069172  | T  | C  | 0.28               | 0.028(0.003)                 | EU                   | 0.31          | 0.018(0.009)       | 1.00 |
| rs9434723  | 1   | 9292282  | A  | G  | 0.16               | 0.029(0.004)                 | EU                   | 0.26          | -0.007(0.01)       | 1.00 |
| rs10779751 | 1   | 11284336 | A  | G  | 0.28               | 0.021(0.003)                 | EU                   | 0.25          | -0.001(0.01)       | 1.00 |
| rs2284746  | 1   | 17306675 | G  | C  | 0.52;<br>0.28      | 0.04(0.003);<br>0.057(0.006) | EU;<br>Asian         | 0.44          | 0.03(0.009)        | 1.00 |
| rs3738814  | 1   | 17331676 | A  | G  | 0.3                | 0.056(0.006)                 | Asian                | 0.50          | 0.029(0.008)       | 1.00 |
| rs12137162 | 1   | 19763396 | A  | C  | 0.28               | 0.019(0.003)                 | EU                   | 0.24          | 0.008(0.01)        | 1.00 |
| rs212524   | 1   | 21583311 | C  | T  | 0.6                | 0.021(0.003)                 | EU                   | 0.67          | 0.01(0.009)        | 1.00 |
| rs1014987  | 1   | 22498824 | G  | C  | 0.25               | 0.02(0.004)                  | EU                   | 0.26          | 0.004(0.01)        | 1.00 |
| rs2806561  | 1   | 23504795 | A  | G  | 0.57               | 0.027(0.003)                 | EU                   | 0.43          | 0(0.008)           | 1.00 |
| rs4601530  | 1   | 25044111 | C  | T  | 0.74               | 0.025(0.003)                 | EU                   | 0.73          | 0.004(0.009)       | 1.00 |
| rs926438   | 1   | 25753638 | T  | C  | 0.54               | 0.015(0.003)                 | EU                   | 0.51          | 0.008(0.008)       | 1.00 |
| rs17163588 | 1   | 26450009 | T  | C  | 0.18               | 0.027(0.004)                 | EU                   | 0.15          | 0.025(0.012)       | 1.00 |
| rs2219320  | 1   | 26803430 | T  | C  | 0.76               | 0.022(0.004)                 | EU                   | 0.65          | 0.017(0.009)       | 1.00 |
| rs12119525 | 1   | 27503662 | A  | T  | 0.36               | 0.018(0.003)                 | EU                   | 0.22          | 0.009(0.01)        | 1.00 |
| rs16834765 | 1   | 32371442 | T  | C  | 0.06               | 0.045(0.006)                 | EU                   | 0.08          | 0.017(0.016)       | 1.00 |
| rs7544462  | 1   | 37962756 | A  | C  | 0.91               | 0.032(0.005)                 | EU                   | 0.97          | -0.007(0.025)      | 1.00 |
| rs209918   | 1   | 40777842 | A  | G  | 0.78               | 0.023(0.004)                 | EU                   | 0.63          | 0.004(0.009)       | 1.00 |
| rs6600365  | 1   | 41556253 | C  | T  | 0.43               | 0.027(0.003)                 | EU                   | 0.47          | 0.025(0.009)       | 1.00 |
| rs3014219  | 1   | 46024454 | G  | A  | 0.54               | 0.021(0.003)                 | EU                   | 0.47          | 0.019(0.008)       | 0.99 |
| rs564914   | 1   | 47915233 | T  | A  | 0.39               | 0.024(0.003)                 | EU                   | 0.43          | 0.018(0.008)       | 1.00 |

Supplementary table 4: Previously reported height SNPs composing GRS1. Position is given in genome build 37. A1 is the reported trait-increasing allele, A2 is the other allele. A1-freq, effects, and SEs, are given in the previously reported discovery study (dscvr) and in the HCHS/SOL. Ethnicity (dscvr) is that of the previously reported study population. Provided imputation info scores are in the HCHS/SOL.

| SNP        | Chr | position  | A1 | A2 | A1-freq<br>(dscvr) | Effect-SE<br>(dscvr) | ethnicity<br>(dscvr) | A1-freq (SOL) | Effect-SE<br>(SOL) | Info |
|------------|-----|-----------|----|----|--------------------|----------------------|----------------------|---------------|--------------------|------|
| rs12855    | 1   | 51440093  | T  | C  | 0.09               | 0.038(0.005)         | EU                   | 0.10          | 0.021(0.014)       | 1.00 |
| rs17387330 | 1   | 54119578  | A  | G  | 0.32               | 0.017(0.003)         | EU                   | 0.20          | 0.016(0.01)        | 1.00 |
| rs6691924  | 1   | 54954245  | T  | C  | 0.9                | 0.032(0.005)         | EU                   | 0.71          | 0.035(0.011)       | 1.00 |
| rs2815379  | 1   | 67510474  | G  | A  | 0.71               | 0.018(0.003)         | EU                   | 0.73          | 0.008(0.009)       | 1.00 |
| rs12731056 | 1   | 78512566  | A  | T  | 0.03               | 0.138(0.022)         | EU                   | 0.00          | 0.877(0.278)       | 0.23 |
| rs17391694 | 1   | 78623626  | T  | C  | 0.12               | 0.043(0.005)         | EU                   | 0.05          | 0.022(0.019)       | 1.00 |
| rs567401   | 1   | 85988158  | T  | C  | 0.17               | 0.025(0.004)         | EU                   |               |                    |      |
| rs2046158  | 1   | 86330770  | C  | T  | 0.84               | 0.021(0.004)         | EU                   | 0.90          | -0.018(0.013)      | 1.00 |
| rs7551732  | 1   | 89139041  | A  | T  | 0.61               | 0.027(0.003)         | EU                   | 0.59          | 0.007(0.009)       | 0.99 |
| rs2811594  | 1   | 93343282  | G  | A  | 0.63               | 0.024(0.003)         | EU                   | 0.69          | 0.014(0.009)       | 1.00 |
| rs17113369 | 1   | 95787223  | T  | C  | 0.97               | 0.073(0.013)         | EU                   | 0.97          | 0.038(0.022)       | 0.99 |
| rs7517682  | 1   | 103519589 | G  | A  | 0.44               | 0.023(0.003)         | EU                   | 0.42          | 0.028(0.009)       | 1.00 |
| rs12120956 | 1   | 113202571 | G  | A  | 0.77               | 0.025(0.004)         | EU                   | 0.73          | 0.008(0.01)        | 1.00 |
| rs1321666  | 1   | 118492052 | C  | T  | 0.48               | 0.017(0.003)         | EU                   | 0.46          | 0.006(0.008)       | 1.00 |
| rs7513464  | 1   | 118849762 | G  | C  | 0.63               | 0.058(0.005)         | Asian                | 0.69          | 0.027(0.009)       | 0.99 |
| rs9428104  | 1   | 118855587 | G  | A  | 0.75               | 0.043(0.003)         | EU                   | 0.73          | 0.028(0.009)       | 1.00 |
| rs1409156  | 1   | 119491784 | G  | A  | 0.37               | 0.014(0.003)         | EU                   | 0.36          | 0.016(0.009)       | 1.00 |
| rs12144094 | 1   | 120264823 | C  | G  | 0.84               | 0.025(0.004)         | EU                   | 0.91          | 0(0.015)           | 1.00 |
| rs6658763  | 1   | 146692373 | C  | T  | 0.92               | 0.036(0.005)         | EU                   | 0.90          | 0.027(0.013)       | 1.00 |
| rs7534365  | 1   | 149876124 | C  | T  | 0.19               | 0.047(0.005)         | EU                   | 0.10          | 0.007(0.014)       | 1.00 |
| rs11205277 | 1   | 149892872 | G  | A  | 0.33               | 0.044(0.006)         | Asian                | 0.29          | 0.02(0.009)        | 1.00 |
| rs3767627  | 1   | 149938898 | T  | C  | 0.84               | 0.036(0.004)         | EU                   | 0.76          | 0.034(0.01)        | 1.00 |
| rs956796   | 1   | 150186091 | G  | A  | 0.9                | 0.022(0.005)         | EU                   | 0.89          | 0.002(0.013)       | 1.00 |
| rs2298265  | 1   | 151259043 | C  | T  | 0.88               | 0.03(0.005)          | EU                   | 0.86          | 0.01(0.012)        | 1.00 |
| rs6688100  | 1   | 160399586 | T  | C  | 0.48               | 0.016(0.003)         | EU                   | 0.47          | -0.012(0.009)      | 1.00 |
| rs4656220  | 1   | 170649277 | T  | C  | 0.39               | 0.021(0.003)         | EU                   | 0.29          | 0.016(0.009)       | 1.00 |
| rs6694089  | 1   | 172083881 | A  | G  | 0.28               | 0.039(0.003)         | EU                   | 0.15          | 0.038(0.012)       | 1.00 |
| rs12125882 | 1   | 172141403 | T  | A  | 0.43               | 0.027(0.003)         | EU                   | 0.38          | 0.016(0.009)       | 1.00 |
| rs12410416 | 1   | 172193820 | C  | T  | 0.31               | 0.031(0.005)         | Asian                | 0.20          | 0.035(0.01)        | 1.00 |
| rs2421992  | 1   | 172241251 | T  | C  | 0.7                | 0.024(0.003)         | EU                   | 0.69          | 0.001(0.009)       | 1.00 |
| rs17369123 | 1   | 172355841 | T  | C  | 0.19               | 0.031(0.004)         | EU                   | 0.11          | 0.005(0.013)       | 1.00 |

Supplementary table 4: Previously reported height SNPs composing GRS1. Position is given in genome build 37. A1 is the reported trait-increasing allele, A2 is the other allele. A1-freq, effects, and SEs, are given in the previously reported discovery study (dscvr) and in the HCHS/SOL. Ethnicity (dscvr) is that of the previously reported study population. Provided imputation info scores are in the HCHS/SOL.

| SNP        | Chr | position  | A1 | A2 | A1-freq<br>(dscvr) | Effect-SE<br>(dscvr) | ethnicity<br>(dscvr) | A1-freq (SOL) | Effect-SE<br>(SOL) | Info |
|------------|-----|-----------|----|----|--------------------|----------------------|----------------------|---------------|--------------------|------|
| rs1325598  | 1   | 176792249 | G  | A  | 0.76               | 0.037(0.006)         | Asian                | 0.59          | 0.014(0.008)       | 1.00 |
| rs1325596  | 1   | 176794066 | A  | G  | 0.57               | 0.025(0.003)         | EU                   | 0.61          | 0.017(0.009)       | 1.00 |
| rs4652773  | 1   | 183054827 | A  | G  | 0.46               | 0.024(0.003)         | EU                   | 0.42          | 0.025(0.009)       | 1.00 |
| rs3814333  | 1   | 184007119 | T  | C  | 0.32               | 0.049(0.003)         | EU                   | 0.26          | 0.014(0.009)       | 0.98 |
| rs1926872  | 1   | 184018475 | C  | T  | 0.48               | 0.046(0.005)         | Asian                | 0.27          | 0.017(0.009)       | 1.00 |
| rs2275325  | 1   | 203800735 | C  | G  | 0.28               | 0.019(0.003)         | EU                   | 0.33          | -0.002(0.009)      | 1.00 |
| rs10863936 | 1   | 212237798 | G  | A  | 0.47               | 0.02(0.003)          | EU                   | 0.33          | 0.007(0.009)       | 1.00 |
| rs6540834  | 1   | 214627419 | C  | T  | 0.66               | 0.027(0.003)         | EU                   | 0.53          | 0.023(0.008)       | 1.00 |
| rs1244981  | 1   | 215046892 | A  | G  | 0.84               | 0.025(0.004)         | EU                   | 0.75          | 0.008(0.01)        | 0.99 |
| rs10495098 | 1   | 218516310 | T  | G  | 0.41               | 0.019(0.003)         | EU                   | 0.39          | -0.005(0.009)      | 1.00 |
| rs1890995  | 1   | 218604678 | A  | G  | 0.73               | 0.039(0.005)         | Asian                | 0.45          | 0.018(0.009)       | 1.00 |
| rs991967   | 1   | 218615451 | C  | A  | 0.28               | 0.034(0.003)         | EU                   | 0.48          | 0.018(0.009)       | 1.00 |
| rs12411277 | 1   | 218975475 | G  | A  | 0.63               | 0.022(0.003)         | EU                   | 0.67          | 0.022(0.009)       | 1.00 |
| rs4428898  | 1   | 219739966 | G  | A  | 0.54               | 0.023(0.003)         | EU                   | 0.68          | -0.009(0.009)      | 1.00 |
| rs1935157  | 1   | 221317258 | G  | C  | 0.3                | 0.025(0.003)         | EU                   | 0.28          | 0.011(0.009)       | 1.00 |
| rs1544196  | 1   | 224632782 | G  | A  | 0.77               | 0.019(0.004)         | EU                   | 0.79          | 0.004(0.011)       | 1.00 |
| rs6696239  | 1   | 227750068 | G  | A  | 0.81               | 0.038(0.004)         | EU                   | 0.86          | -0.004(0.012)      | 1.00 |
| rs11799609 | 1   | 243618317 | T  | G  | 0.16               | 0.026(0.004)         | EU                   | 0.09          | -0.048(0.014)      | 0.99 |
| rs17038954 | 2   | 1645673   | T  | C  | 0.06               | 0.044(0.006)         | EU                   | 0.09          | 0.017(0.014)       | 1.00 |
| rs10048625 | 2   | 1775648   | T  | C  | 0.18               | 0.026(0.004)         | EU                   | 0.12          | 0.014(0.013)       | 1.00 |
| rs3885668  | 2   | 10178479  | C  | T  | 0.43               | 0.022(0.003)         | EU                   | 0.33          | 0.013(0.009)       | 0.99 |
| rs2345835  | 2   | 18574952  | C  | T  | 0.54               | 0.018(0.003)         | EU                   | 0.60          | 0.011(0.008)       | 1.00 |
| rs13006748 | 2   | 20151819  | C  | G  | 0.3                | 0.022(0.003)         | EU                   | 0.27          | -0.011(0.009)      | 0.98 |
| rs7561273  | 2   | 24247514  | G  | A  | 0.54               | 0.025(0.003)         | EU                   | 0.67          | 0.022(0.009)       | 1.00 |
| rs2278483  | 2   | 25040082  | T  | C  | 0.24               | 0.041(0.003)         | EU                   | 0.14          | 0.008(0.012)       | 1.00 |
| rs4665736  | 2   | 25187599  | T  | C  | 0.55               | 0.029(0.006)         | Asian                | 0.56          | 0.036(0.009)       | 1.00 |
| rs2289195  | 2   | 25463483  | A  | G  | 0.43               | 0.038(0.003)         | EU                   | 0.50          | 0.031(0.008)       | 1.00 |
| rs11694842 | 2   | 25482970  | A  | G  | 0.92               | 0.053(0.008)         | Asian                | 0.85          | 0.008(0.012)       | 1.00 |
| rs10460566 | 2   | 25483121  | A  | G  | 0.76               | 0.007(0.004)         | EU                   | 0.74          | 0.023(0.009)       | 1.00 |
| rs780094   | 2   | 27741237  | C  | T  | 0.61               | 0.021(0.003)         | EU                   | 0.66          | 0.012(0.009)       | 1.00 |
| rs7605699  | 2   | 33315750  | G  | C  | 0.81               | 0.028(0.004)         | EU                   | 0.83          | 0.008(0.011)       | 1.00 |

Supplementary table 4: Previously reported height SNPs composing GRS1. Position is given in genome build 37. A1 is the reported trait-increasing allele, A2 is the other allele. A1-freq, effects, and SEs, are given in the previously reported discovery study (dscvr) and in the HCHS/SOL. Ethnicity (dscvr) is that of the previously reported study population. Provided imputation info scores are in the HCHS/SOL.

| SNP        | Chr | position  | A1 | A2 | A1-freq<br>(dscvr) | Effect-SE<br>(dscvr) | ethnicity<br>(dscvr) | A1-freq (SOL) | Effect-SE<br>(SOL) | Info |
|------------|-----|-----------|----|----|--------------------|----------------------|----------------------|---------------|--------------------|------|
| rs6714546  | 2   | 33361425  | G  | A  | 0.72               | 0.03(0.003)          | EU                   | 0.81          | 0.034(0.011)       | 1.00 |
| rs6751657  | 2   | 33405151  | C  | T  | 0.53               | 0.024(0.003)         | EU                   | 0.50          | 0.013(0.008)       | 1.00 |
| rs3769528  | 2   | 33471192  | A  | G  | 0.82               | 0.06(0.006)          | Asian                | 0.98          | 0.059(0.028)       | 1.00 |
| rs711245   | 2   | 36768875  | G  | A  | 0.67               | 0.024(0.003)         | EU                   | 0.50          | 0.008(0.009)       | 1.00 |
| rs6544089  | 2   | 37758745  | T  | C  | 0.39               | 0.02(0.003)          | EU                   | 0.38          | 0.008(0.009)       | 1.00 |
| rs17511102 | 2   | 37960613  | T  | A  | 0.09               | 0.053(0.006)         | EU                   | 0.04          | 0.036(0.021)       | 0.96 |
| rs12615742 | 2   | 37995727  | T  | C  | 0.48               | 0.026(0.004)         | EU                   | 0.34          | 0.019(0.009)       | 1.00 |
| rs13416119 | 2   | 42462930  | A  | G  | 0.9                | 0.028(0.005)         | EU                   | 0.95          | 0.004(0.019)       | 0.98 |
| rs9309101  | 2   | 43629612  | G  | A  | 0.33               | 0.021(0.003)         | EU                   | 0.27          | 0.001(0.01)        | 1.00 |
| rs897080   | 2   | 44774202  | C  | T  | 0.26               | 0.028(0.003)         | EU                   | 0.18          | -0.004(0.011)      | 1.00 |
| rs17032525 | 2   | 44907331  | A  | G  | 0.13               | 0.025(0.005)         | EU                   | 0.15          | 0.021(0.011)       | 1.00 |
| rs12474201 | 2   | 46921285  | A  | G  | 0.36               | 0.028(0.003)         | EU                   | 0.38          | 0.022(0.009)       | 1.00 |
| rs354196   | 2   | 54966407  | G  | A  | 0.53               | 0.021(0.003)         | EU                   | 0.61          | 0.002(0.009)       | 0.99 |
| rs2589113  | 2   | 55516323  | T  | G  | 0.48               | 0.043(0.009)         | African              | 0.10          | 0.021(0.015)       | 1.00 |
| rs4146922  | 2   | 56067182  | T  | A  | 0.18               | 0.061(0.006)         | Asian                | 0.81          | 0.035(0.011)       | 1.00 |
| rs1367226  | 2   | 56089540  | G  | A  | 0.57               | 0.005(0.003)         | EU                   | 0.53          | -0.004(0.009)      | 1.00 |
| rs3791679  | 2   | 56096892  | A  | G  | 0.77               | 0.06(0.004)          | EU                   | 0.80          | 0.04(0.01)         | 1.00 |
| rs3791675  | 2   | 56111309  | C  | T  | 0.23               | 0.07(0.006)          | Asian                | 0.79          | 0.039(0.01)        | 1.00 |
| rs3791673  | 2   | 56113538  | G  | A  | 0.96               | 0.012(0.008)         | EU                   | 0.97          | -0.025(0.024)      | 0.99 |
| rs2120335  | 2   | 68495002  | G  | A  | 0.59               | 0.019(0.003)         | EU                   | 0.49          | 0.003(0.008)       | 0.99 |
| rs4315565  | 2   | 69287943  | G  | A  | 0.8                | 0.067(0.012)         | African              | 0.47          | 0.011(0.009)       | 1.00 |
| rs7568069  | 2   | 71584485  | G  | A  | 0.42               | 0.022(0.003)         | EU                   | 0.43          | 0.028(0.009)       | 1.00 |
| rs867529   | 2   | 88913273  | C  | G  | 0.46               | 0.036(0.005)         | Asian                | 0.28          | 0.021(0.009)       | 1.00 |
| rs11684404 | 2   | 88924622  | C  | T  | 0.34               | 0.032(0.003)         | EU                   | 0.35          | 0.02(0.009)        | 1.00 |
| rs11683207 | 2   | 98333290  | T  | C  | 0.8                | 0.023(0.004)         | EU                   | 0.90          | 0.01(0.014)        | 1.00 |
| rs13388725 | 2   | 109047190 | G  | A  | 0.41               | 0.018(0.003)         | EU                   | 0.52          | 0.009(0.009)       | 1.00 |
| rs2166898  | 2   | 121612659 | G  | A  | 0.84               | 0.027(0.004)         | EU                   | 0.84          | 0.008(0.011)       | 1.00 |
| rs7567288  | 2   | 134434824 | C  | T  | 0.2                | 0.028(0.004)         | EU                   | 0.18          | 0.016(0.011)       | 1.00 |
| rs4953951  | 2   | 136187345 | C  | T  | 0.9                | 0.036(0.005)         | EU                   | 0.71          | 0.02(0.009)        | 1.00 |
| rs749234   | 2   | 145231349 | A  | G  | 0.32               | 0.017(0.003)         | EU                   | 0.46          | 0.001(0.008)       | 0.99 |
| rs540652   | 2   | 169707428 | T  | C  | 0.46               | 0.021(0.003)         | EU                   | 0.49          | 0.005(0.009)       | 1.00 |

Supplementary table 4: Previously reported height SNPs composing GRS1. Position is given in genome build 37. A1 is the reported trait-increasing allele, A2 is the other allele. A1-freq, effects, and SEs, are given in the previously reported discovery study (dscvr) and in the HCHS/SOL. Ethnicity (dscvr) is that of the previously reported study population. Provided imputation info scores are in the HCHS/SOL.

| SNP        | Chr | position  | A1 | A2 | A1-freq<br>(dscvr) | Effect-SE<br>(dscvr) | ethnicity<br>(dscvr) | A1-freq (SOL) | Effect-SE<br>(SOL) | Info |
|------------|-----|-----------|----|----|--------------------|----------------------|----------------------|---------------|--------------------|------|
| rs12987566 | 2   | 172152646 | T  | C  | 0.27               | 0.024(0.003)         | EU                   | 0.23          | 0.01(0.01)         | 1.00 |
| rs6746356  | 2   | 174815898 | A  | C  | 0.75               | 0.019(0.003)         | EU                   | 0.71          | 0.006(0.009)       | 1.00 |
| rs7567851  | 2   | 178684720 | C  | G  | 0.08               | 0.039(0.006)         | EU                   | 0.09          | -0.003(0.014)      | 1.00 |
| rs833152   | 2   | 183219101 | C  | A  | 0.42               | 0.017(0.003)         | EU                   | 0.36          | 0.01(0.009)        | 0.99 |
| rs12693589 | 2   | 191832662 | C  | T  | 0.25               | 0.022(0.003)         | EU                   | 0.15          | 0.024(0.012)       | 1.00 |
| rs6435143  | 2   | 203194256 | A  | C  | 0.44               | 0.019(0.003)         | EU                   | 0.39          | 0.005(0.009)       | 1.00 |
| rs4425077  | 2   | 216410516 | G  | C  | 0.41               | 0.02(0.003)          | EU                   | 0.38          | 0.009(0.008)       | 1.00 |
| rs12329133 | 2   | 217935116 | C  | T  | 0.61               | 0.017(0.003)         | EU                   | 0.72          | -0.006(0.009)      | 1.00 |
| rs17181956 | 2   | 218146080 | C  | T  | 0.87               | 0.028(0.005)         | EU                   | 0.92          | -0.006(0.015)      | 1.00 |
| rs994533   | 2   | 218284278 | G  | C  | 0.67               | 0.027(0.003)         | EU                   | 0.50          | 0.003(0.009)       | 1.00 |
| rs1864439  | 2   | 218616633 | T  | C  | 0.89               | 0.027(0.005)         | EU                   | 0.90          | 0.027(0.014)       | 0.92 |
| rs992157   | 2   | 219154781 | A  | G  | 0.57               | 0.022(0.003)         | EU                   | 0.47          | 0.019(0.008)       | 1.00 |
| rs2305833  | 2   | 219305404 | C  | G  | 0.58               | 0.028(0.003)         | EU                   | 0.53          | 0.014(0.009)       | 1.00 |
| rs611203   | 2   | 219472325 | A  | G  | 0.77               | 0.035(0.006)         | Asian                | 0.61          | 0.011(0.008)       | 1.00 |
| rs1541777  | 2   | 219587291 | A  | G  | 0.84               | 0.037(0.007)         | Asian                | 0.54          | 0.009(0.008)       | 1.00 |
| rs4674354  | 2   | 219903723 | T  | C  | 0.77               | 0.004(0.004)         | EU                   | 0.63          | -0.004(0.009)      | 1.00 |
| rs12470505 | 2   | 219908369 | T  | G  | 0.9                | 0.048(0.005)         | EU                   | 0.84          | 0.028(0.012)       | 1.00 |
| rs16859517 | 2   | 219949184 | T  | C  | 0.04               | 0.067(0.008)         | EU                   | 0.15          | 0.017(0.012)       | 1.00 |
| rs7588654  | 2   | 219983030 | C  | T  | 0.47               | 0.047(0.005)         | Asian                | 0.19          | 0.003(0.011)       | 0.99 |
| rs6753739  | 2   | 220028900 | A  | G  | 0.54               | 0.033(0.005)         | Asian                | 0.37          | 0.003(0.009)       | 1.00 |
| rs12621643 | 2   | 223917983 | G  | T  | 0.7                | 0.017(0.003)         | EU                   | 0.70          | 0.003(0.009)       | 0.98 |
| rs6761041  | 2   | 225030129 | T  | C  | 0.55               | 0.023(0.003)         | EU                   | 0.52          | 0.001(0.008)       | 1.00 |
| rs6733349  | 2   | 232268312 | T  | C  | 0.66               | 0.022(0.003)         | EU                   | 0.70          | 0.008(0.009)       | 0.98 |
| rs6754426  | 2   | 232322779 | G  | A  | 0.55               | 0.027(0.003)         | EU                   | 0.54          | 0.005(0.008)       | 1.00 |
| rs4973429  | 2   | 232377818 | G  | T  | 0.66               | 0.028(0.003)         | EU                   | 0.55          | 0.015(0.008)       | 1.00 |
| rs2679184  | 2   | 232779223 | T  | C  | 0.77               | 0.031(0.004)         | EU                   | 0.69          | 0.029(0.009)       | 1.00 |
| rs749052   | 2   | 232796610 | T  | C  | 0.94               | 0.067(0.006)         | EU                   | 0.94          | 0.044(0.018)       | 1.00 |
| rs10460436 | 2   | 232815341 | G  | A  | 0.49               | 0.062(0.005)         | Asian                | 0.83          | 0.034(0.012)       | 1.00 |
| rs11677466 | 2   | 232982257 | T  | A  | 0.09               | 0.064(0.006)         | EU                   | 0.03          | 0.011(0.023)       | 1.00 |
| rs3116168  | 2   | 232989831 | C  | T  | 0.73               | 0.039(0.003)         | EU                   | 0.63          | 0.026(0.009)       | 1.00 |
| rs6728302  | 2   | 233053961 | A  | G  | 0.48               | 0.065(0.005)         | Asian                | 0.81          | 0.031(0.011)       | 1.00 |

Supplementary table 4: Previously reported height SNPs composing GRS1. Position is given in genome build 37. A1 is the reported trait-increasing allele, A2 is the other allele. A1-freq, effects, and SEs, are given in the previously reported discovery study (dscvr) and in the HCHS/SOL. Ethnicity (dscvr) is that of the previously reported study population. Provided imputation info scores are in the HCHS/SOL.

| SNP        | Chr | position  | A1 | A2 | A1-freq<br>(dscvr) | Effect-SE<br>(dscvr) | ethnicity<br>(dscvr) | A1-freq (SOL) | Effect-SE<br>(SOL) | Info |
|------------|-----|-----------|----|----|--------------------|----------------------|----------------------|---------------|--------------------|------|
| rs2343240  | 2   | 233087483 | T  | C  | 0.97               | 0.078(0.01)          | EU                   | 0.87          | 0.043(0.013)       | 0.99 |
| rs13393800 | 2   | 233442091 | A  | G  | 0.29               | 0.027(0.003)         | EU                   | 0.13          | 0.023(0.012)       | 1.00 |
| rs4344931  | 2   | 241818527 | C  | A  | 0.71               | 0.02(0.003)          | EU                   | 0.61          | 0.007(0.009)       | 1.00 |
| rs11687941 | 2   | 242191410 | C  | G  | 0.75               | 0.025(0.003)         | EU                   | 0.81          | 0.027(0.011)       | 1.00 |
| rs2633761  | 3   | 4728104   | A  | G  | 0.5                | 0.016(0.003)         | EU                   | 0.35          | -0.001(0.009)      | 1.00 |
| rs13078528 | 3   | 11646954  | A  | G  | 0.94               | 0.045(0.006)         | EU                   | 0.85          | 0.011(0.012)       | 1.00 |
| rs2596831  | 3   | 12632652  | G  | C  | 0.57               | 0.017(0.003)         | EU                   | 0.63          | 0.007(0.009)       | 1.00 |
| rs2597513  | 3   | 13555836  | C  | T  | 0.11               | 0.039(0.005)         | EU                   | 0.11          | 0.035(0.013)       | 1.00 |
| rs11708412 | 3   | 13733624  | A  | G  | 0.26               | 0.019(0.004)         | EU                   | 0.16          | 0.001(0.012)       | 0.95 |
| rs9816693  | 3   | 38047954  | C  | G  | 0.17               | 0.031(0.004)         | EU                   | 0.15          | -0.021(0.012)      | 1.00 |
| rs3915129  | 3   | 41243742  | G  | T  | 0.47               | 0.016(0.003)         | EU                   | 0.37          | 0.007(0.009)       | 1.00 |
| rs13088462 | 3   | 51071713  | C  | T  | 0.06               | 0.059(0.007)         | EU                   | 0.02          | 0.045(0.029)       | 1.00 |
| rs4256170  | 3   | 51192126  | A  | G  | 0.01               | 0.191(0.028)         | EU                   | 0.01          | 0.032(0.039)       | 0.96 |
| rs2240919  | 3   | 52831701  | C  | G  | 0.66               | 0.027(0.003)         | EU                   | 0.62          | -0.003(0.009)      | 1.00 |
| rs2581830  | 3   | 53134098  | T  | C  | 0.4                | 0.031(0.003)         | EU                   | 0.41          | 0.021(0.009)       | 1.00 |
| rs2034172  | 3   | 55411763  | G  | A  | 0.68               | 0.018(0.003)         | EU                   | 0.79          | -0.004(0.01)       | 1.00 |
| rs9835332  | 3   | 56667682  | G  | C  | 0.54               | 0.028(0.003)         | EU                   | 0.31          | 0.011(0.01)        | 1.00 |
| rs1658351  | 3   | 58013573  | C  | T  | 0.35               | 0.022(0.003)         | EU                   | 0.25          | -0.004(0.01)       | 1.00 |
| rs6794009  | 3   | 61513495  | G  | A  | 0.44               | 0.016(0.003)         | EU                   | 0.40          | 0.015(0.008)       | 1.00 |
| rs17806888 | 3   | 67416322  | T  | C  | 0.88               | 0.034(0.005)         | EU                   | 0.91          | 0.036(0.014)       | 1.00 |
| rs2175513  | 3   | 68622366  | G  | A  | 0.43               | 0.017(0.003)         | EU                   | 0.52          | -0.001(0.009)      | 0.99 |
| rs12330322 | 3   | 72455355  | C  | T  | 0.78               | 0.034(0.004)         | EU                   | 0.76          | 0.03(0.01)         | 1.00 |
| rs13072744 | 3   | 72509637  | C  | T  | 0.52               | 0.034(0.006)         | Asian                | 0.46          | 0.014(0.008)       | 0.99 |
| rs7633464  | 3   | 98715823  | A  | G  | 0.48               | 0.019(0.003)         | EU                   | 0.41          | 0.018(0.008)       | 1.00 |
| rs9825951  | 3   | 99269921  | T  | A  | 0.35               | 0.022(0.003)         | EU                   | 0.44          | 0.029(0.009)       | 0.98 |
| rs1797625  | 3   | 112826415 | T  | A  | 0.36               | 0.019(0.003)         | EU                   | 0.31          | 0.031(0.009)       | 1.00 |
| rs1533269  | 3   | 114214611 | C  | A  | 0.7                | 0.02(0.003)          | EU                   | 0.56          | 0(0.008)           | 1.00 |
| rs1546391  | 3   | 114697457 | G  | C  | 0.07               | 0.039(0.006)         | EU                   | 0.14          | 0(0.012)           | 1.00 |
| rs7636293  | 3   | 129045906 | T  | C  | 0.69               | 0.035(0.005)         | Asian                | 0.60          | 0.013(0.008)       | 1.00 |
| rs6439168  | 3   | 129050943 | G  | A  | 0.79               | 0.037(0.004)         | EU                   | 0.79          | 0.034(0.01)        | 1.00 |
| rs4974480  | 3   | 134178562 | T  | A  | 0.68               | 0.026(0.003)         | EU                   | 0.67          | 0.017(0.009)       | 0.99 |



Supplementary table 4: Previously reported height SNPs composing GRS1. Position is given in genome build 37. A1 is the reported trait-increasing allele, A2 is the other allele. A1-freq, effects, and SEs, are given in the previously reported discovery study (dscvr) and in the HCHS/SOL. Ethnicity (dscvr) is that of the previously reported study population. Provided imputation info scores are in the HCHS/SOL.

| SNP        | Chr | position  | A1 | A2 | A1-freq<br>(dscvr) | Effect-SE<br>(dscvr)          | ethnicity<br>(dscvr) | A1-freq (SOL) | Effect-SE<br>(SOL) | Info |
|------------|-----|-----------|----|----|--------------------|-------------------------------|----------------------|---------------|--------------------|------|
| rs6762606  | 3   | 134379752 | C  | T  | 0.71               | 0.001(0.003)                  | EU                   | 0.82          | 0.003(0.011)       | 1.00 |
| rs9880211  | 3   | 136107549 | G  | A  | 0.75               | 0.03(0.003)                   | EU                   | 0.85          | 0.013(0.012)       | 1.00 |
| rs6440003  | 3   | 141094209 | A  | G  | 0.81               | 0.064(0.012)                  | African              | 0.45          | 0.044(0.008)       | 1.00 |
| rs6764769  | 3   | 141100280 | G  | A  | 0.81               | 0.061(0.012)                  | African              | 0.45          | 0.044(0.008)       | 1.00 |
| rs6763931  | 3   | 141102833 | A  | G  | 0.33;<br>0.81      | 0.059(0.005);<br>0.061(0.012) | Asian; African       | 0.45          | 0.043(0.008)       | 1.00 |
| rs724016   | 3   | 141105570 | G  | A  | 0.44;<br>0.74      | 0.078(0.003);<br>0.049(0.011) | EU; African          | 0.44          | 0.042(0.008)       | 1.00 |
| rs2871960  | 3   | 141121814 | C  | A  | 0.81               | 0.066(0.012)                  | African              | 0.45          | 0.045(0.008)       | 1.00 |
| rs1344674  | 3   | 141125186 | G  | A  | 0.81               | 0.065(0.012)                  | African              | 0.45          | 0.043(0.008)       | 1.00 |
| rs11714558 | 3   | 141163045 | T  | C  | 0.97               | 0.134(0.019)                  | EU                   | 0.99          | 0.025(0.036)       | 1.00 |
| rs936339   | 3   | 142535505 | T  | C  | 0.19               | 0.022(0.004)                  | EU                   | 0.15          | 0.004(0.012)       | 0.97 |
| rs4325879  | 3   | 156851984 | C  | T  | 0.73               | 0.021(0.004)                  | EU                   | 0.60          | -0.007(0.009)      | 1.00 |
| rs6441170  | 3   | 157806960 | C  | T  | 0.38               | 0.022(0.003)                  | EU                   | 0.50          | 0.015(0.008)       | 1.00 |
| rs7652177  | 3   | 171969077 | G  | C  | 0.51               | 0.038(0.003)                  | EU                   | 0.56          | 0.028(0.009)       | 1.00 |
| rs4243400  | 3   | 171970859 | G  | A  | 0.48               | 0.045(0.005)                  | Asian                | 0.55          | 0.027(0.009)       | 1.00 |
| rs509035   | 3   | 172163449 | A  | G  | 0.32               | 0.031(0.003)                  | EU                   | 0.31          | 0.02(0.009)        | 1.00 |
| rs9858528  | 3   | 183355405 | A  | G  | 0.74               | 0.022(0.003)                  | EU                   | 0.68          | 0.019(0.009)       | 1.00 |
| rs16860216 | 3   | 185488882 | A  | G  | 0.24               | 0.001(0.004)                  | EU                   | 0.22          | -0.005(0.01)       | 1.00 |
| rs720390   | 3   | 185548683 | A  | G  | 0.38               | 0.035(0.003)                  | EU                   | 0.28          | 0.023(0.009)       | 1.00 |
| rs2300921  | 3   | 185651001 | C  | T  | 0.42               | 0.018(0.003)                  | EU                   | 0.27          | 0.027(0.009)       | 1.00 |
| rs4686904  | 3   | 187438522 | C  | T  | 0.35               | 0.021(0.003)                  | EU                   | 0.34          | 0.016(0.009)       | 1.00 |
| rs7646824  | 3   | 190815978 | A  | G  | 0.89               | 0.026(0.005)                  | EU                   | 0.89          | 0.01(0.013)        | 1.00 |
| rs9841435  | 3   | 191111160 | G  | A  | 0.32               | 0.02(0.003)                   | EU                   | 0.41          | 0.017(0.008)       | 1.00 |
| rs3958122  | 4   | 1693931   | T  | C  | 0.35               | 0.027(0.003)                  | EU                   | 0.33          | -0.007(0.009)      | 1.00 |
| rs867245   | 4   | 2218888   | C  | G  | 0.94               | 0.041(0.006)                  | EU                   | 0.81          | 0.038(0.011)       | 1.00 |
| rs11722554 | 4   | 5016883   | G  | A  | 0.96               | 0.063(0.01)                   | EU                   | 0.97          | 0.005(0.022)       | 1.00 |
| rs6446315  | 4   | 5035587   | G  | A  | 0.17               | 0.028(0.004)                  | EU                   | 0.14          | 0.017(0.012)       | 1.00 |
| rs868489   | 4   | 7055253   | C  | T  | 0.78               | 0.02(0.004)                   | EU                   | 0.77          | -0.003(0.01)       | 1.00 |
| rs6829680  | 4   | 7912333   | A  | G  | 0.44               | 0.017(0.003)                  | EU                   | 0.26          | 0.002(0.01)        | 1.00 |
| rs2302580  | 4   | 8608634   | C  | T  | 0.58               | 0.028(0.004)                  | EU                   | 0.50          | 0.016(0.008)       | 1.00 |

Supplementary table 4: Previously reported height SNPs composing GRS1. Position is given in genome build 37. A1 is the reported trait-increasing allele, A2 is the other allele. A1-freq, effects, and SEs, are given in the previously reported discovery study (dscvr) and in the HCHS/SOL. Ethnicity (dscvr) is that of the previously reported study population. Provided imputation info scores are in the HCHS/SOL.

| SNP        | Chr | position | A1 | A2 | A1-freq<br>(dscvr) | Effect-SE<br>(dscvr)         | ethnicity<br>(dscvr) | A1-freq (SOL) | Effect-SE<br>(SOL) | Info |
|------------|-----|----------|----|----|--------------------|------------------------------|----------------------|---------------|--------------------|------|
| rs763318   | 4   | 12963574 | G  | A  | 0.53               | 0.021(0.003)                 | EU                   | 0.54          | 0.005(0.008)       | 1.00 |
| rs4834927  | 4   | 13194091 | G  | A  | 0.34               | 0.019(0.003)                 | EU                   | 0.30          | 0.013(0.009)       | 1.00 |
| rs7678436  | 4   | 17797966 | G  | A  | 0.67               | 0.075(0.006)                 | Asian                | 0.78          | 0.021(0.01)        | 1.00 |
| rs2074974  | 4   | 17812615 | A  | C  | 0.31               | 0.056(0.012)                 | African              | 0.34          | 0.032(0.009)       | 1.00 |
| rs16895802 | 4   | 17815889 | C  | G  | 0.88               | 0.09(0.006)                  | Asian                | 0.99          | -0.03(0.042)       | 0.99 |
| rs6844379  | 4   | 17856801 | C  | T  | 0.35               | 0.05(0.01)                   | African              | 0.35          | 0.036(0.009)       | 1.00 |
| rs13131350 | 4   | 17877487 | A  | G  | 0.74               | 0.085(0.006)                 | Asian                | 0.86          | 0.039(0.012)       | 0.99 |
| rs925098   | 4   | 17919811 | G  | A  | 0.35               | 0.056(0.01)                  | African              | 0.35          | 0.038(0.009)       | 1.00 |
| rs7663818  | 4   | 17936443 | C  | T  | 0.61               | 0.049(0.01)                  | African              | 0.80          | 0.043(0.01)        | 1.00 |
| rs7692995  | 4   | 17936634 | T  | C  | 0.85;<br>0.61      | 0.074(0.004);<br>0.049(0.01) | EU; African          | 0.80          | 0.043(0.01)        | 1.00 |
| rs2707450  | 4   | 17942560 | C  | T  | 0.26               | 0.053(0.011)                 | African              | 0.32          | 0.04(0.009)        | 1.00 |
| rs6853216  | 4   | 17970655 | C  | T  | 0.53               | 0.044(0.009)                 | African              | 0.78          | 0.035(0.01)        | 1.00 |
| rs2320299  | 4   | 17972372 | G  | A  | 0.37               | 0.049(0.01)                  | African              | 0.35          | 0.036(0.009)       | 1.00 |
| rs16896210 | 4   | 17992332 | A  | G  | 0.56               | 0.044(0.009)                 | African              | 0.79          | 0.034(0.01)        | 1.00 |
| rs724577   | 4   | 17993410 | A  | C  | 0.31               | 0.054(0.01)                  | African              | 0.33          | 0.036(0.009)       | 1.00 |
| rs961014   | 4   | 18010384 | A  | G  | 0.42               | 0(0.003)                     | EU                   | 0.56          | 0.008(0.008)       | 1.00 |
| rs16896261 | 4   | 18011202 | A  | G  | 0.65               | 0.049(0.01)                  | African              | 0.82          | 0.045(0.011)       | 1.00 |
| rs1380294  | 4   | 18024121 | C  | T  | 0.56               | 0.044(0.009)                 | African              | 0.79          | 0.037(0.01)        | 1.00 |
| rs16994718 | 4   | 38688362 | C  | T  | 0.85               | 0.025(0.004)                 | EU                   | 0.73          | 0.001(0.009)       | 1.00 |
| rs2306596  | 4   | 39343940 | A  | C  | 0.52               | 0.019(0.003)                 | EU                   | 0.53          | 0.002(0.009)       | 0.99 |
| rs1996422  | 4   | 48687351 | G  | A  | 0.28               | 0.022(0.003)                 | EU                   | 0.24          | 0.009(0.01)        | 0.99 |
| rs13113518 | 4   | 56399648 | C  | T  | 0.36               | 0.018(0.003)                 | EU                   | 0.43          | 0.012(0.009)       | 1.00 |
| rs2227901  | 4   | 57798189 | A  | G  | 0.39               | 0.029(0.005)                 | Asian                | 0.20          | 0.024(0.01)        | 1.00 |
| rs17081935 | 4   | 57823476 | T  | C  | 0.2                | 0.031(0.004)                 | EU                   | 0.18          | 0.017(0.011)       | 1.00 |
| rs3733309  | 4   | 57857188 | G  | A  | 0.41               | 0.027(0.005)                 | Asian                | 0.16          | 0.007(0.011)       | 1.00 |
| rs9993613  | 4   | 73476014 | T  | G  | 0.47               | 0.03(0.003)                  | EU                   | 0.45          | 0.035(0.009)       | 1.00 |
| rs16848425 | 4   | 73515825 | T  | C  | 0.2                | 0.039(0.006)                 | Asian                | 0.13          | 0.035(0.012)       | 1.00 |
| rs710841   | 4   | 82149831 | T  | C  | 0.65               | 0.046(0.01)                  | African              | 0.32          | 0.037(0.009)       | 1.00 |
| rs17556750 | 4   | 82155568 | A  | C  | 0.31               | 0.046(0.003)                 | EU                   | 0.22          | 0.014(0.01)        | 1.00 |
| rs1662840  | 4   | 82156409 | T  | C  | 0.69               | 0.051(0.01)                  | African              | 0.32          | 0.037(0.009)       | 0.99 |

Supplementary table 4: Previously reported height SNPs composing GRS1. Position is given in genome build 37. A1 is the reported trait-increasing allele, A2 is the other allele. A1-freq, effects, and SEs, are given in the previously reported discovery study (dscvr) and in the HCHS/SOL. Ethnicity (dscvr) is that of the previously reported study population. Provided imputation info scores are in the HCHS/SOL.

| SNP        | Chr | position  | A1 | A2 | A1-freq<br>(dscvr) | Effect-SE<br>(dscvr)          | ethnicity<br>(dscvr) | A1-freq (SOL) | Effect-SE<br>(SOL) | Info |
|------------|-----|-----------|----|----|--------------------|-------------------------------|----------------------|---------------|--------------------|------|
| rs994014   | 4   | 82165790  | C  | T  | 0.71               | 0.052(0.01)                   | African              | 0.34          | 0.037(0.009)       | 1.00 |
| rs2167645  | 4   | 82184049  | T  | C  | 0.04               | 0.139(0.021)                  | EU                   | 0.04          | 0.022(0.02)        | 0.95 |
| rs17499117 | 4   | 82204091  | G  | A  | 0.04               | 0.14(0.021)                   | EU                   | 0.01          | 0.04(0.035)        | 1.00 |
| rs2011962  | 4   | 82220324  | C  | A  | 0.18               | 0.047(0.006)                  | Asian                | 0.34          | 0.035(0.009)       | 1.00 |
| rs11731978 | 4   | 88194170  | A  | G  | 0.86               | 0.023(0.004)                  | EU                   | 0.85          | 0.014(0.012)       | 1.00 |
| rs6813055  | 4   | 88630031  | A  | T  | 0.49               | 0.016(0.003)                  | EU                   | 0.46          | -0.002(0.008)      | 1.00 |
| rs2454206  | 4   | 106196951 | A  | G  | 0.79               | 0.032(0.006)                  | Asian                | 0.76          | 0.01(0.01)         | 1.00 |
| rs12639764 | 4   | 106216205 | T  | C  | 0.62               | 0.027(0.003)                  | EU                   | 0.74          | 0.01(0.01)         | 1.00 |
| rs1562975  | 4   | 109408608 | A  | G  | 0.3                | 0.025(0.003)                  | EU                   | 0.20          | 0.002(0.011)       | 1.00 |
| rs7659107  | 4   | 114742249 | G  | A  | 0.23               | 0.024(0.004)                  | EU                   | 0.23          | 0.002(0.01)        | 1.00 |
| rs6838153  | 4   | 122720999 | G  | A  | 0.34               | 0.022(0.003)                  | EU                   | 0.30          | 0.008(0.009)       | 1.00 |
| rs12513181 | 4   | 123835656 | C  | A  | 0.26               | 0.02(0.003)                   | EU                   | 0.36          | -0.004(0.009)      | 1.00 |
| rs11100790 | 4   | 144442611 | C  | T  | 0.2                | 0.025(0.004)                  | EU                   | 0.26          | 0.001(0.01)        | 1.00 |
| rs7654571  | 4   | 145321006 | A  | G  | 0.23               | 0.022(0.004)                  | EU                   | 0.19          | -0.003(0.011)      | 1.00 |
| rs6845999  | 4   | 145565826 | T  | C  | 0.44;<br>0.22      | 0.051(0.003);<br>0.042(0.006) | EU;<br>Asian         | 0.41          | 0.026(0.009)       | 1.00 |
| rs1812175  | 4   | 145574844 | G  | A  | 0.84               | 0.079(0.004)                  | EU                   | 0.78          | 0.029(0.01)        | 1.00 |
| rs17777628 | 4   | 145592686 | G  | A  | 0.96               | 0.052(0.008)                  | EU                   | 0.97          | 0.015(0.025)       | 1.00 |
| rs4240326  | 4   | 145839264 | A  | G  | 0.46               | 0.04(0.003)                   | EU                   | 0.35          | 0.025(0.009)       | 1.00 |
| rs6823268  | 4   | 145982563 | G  | A  | 0.18               | 0.043(0.006)                  | Asian                | 0.29          | 0.022(0.009)       | 1.00 |
| rs996743   | 4   | 146128884 | A  | G  | 0.92               | 0.063(0.006)                  | EU                   | 0.94          | 0.014(0.016)       | 1.00 |
| rs13133465 | 4   | 146192618 | C  | G  | 0.93               | 0.045(0.006)                  | EU                   | 0.94          | 0.008(0.018)       | 0.95 |
| rs13150868 | 4   | 152180671 | T  | G  | 0.44               | 0.017(0.003)                  | EU                   | 0.44          | 0.016(0.008)       | 1.00 |
| rs955748   | 4   | 184215675 | G  | A  | 0.76               | 0.028(0.003)                  | EU                   | 0.67          | 0.005(0.009)       | 1.00 |
| rs17410035 | 5   | 31541142  | T  | G  | 0.33               | 0.019(0.003)                  | EU                   | 0.20          | 0.016(0.01)        | 1.00 |
| rs7731703  | 5   | 32694942  | C  | T  | 0.68               | 0.03(0.003)                   | EU                   | 0.75          | 0.022(0.01)        | 0.98 |
| rs3811958  | 5   | 32772043  | G  | A  | 0.26               | 0.027(0.003)                  | EU                   | 0.30          | 0.012(0.009)       | 1.00 |
| rs9292468  | 5   | 32819073  | T  | C  | 0.4                | 0.036(0.003)                  | EU                   | 0.42          | 0.017(0.008)       | 1.00 |
| rs13183624 | 5   | 32821168  | A  | G  | 0.76               | 0.018(0.003)                  | EU                   | 0.79          | 0.021(0.01)        | 1.00 |
| rs11745439 | 5   | 33230034  | G  | A  | 0.72               | 0.026(0.003)                  | EU                   | 0.58          | 0.02(0.009)        | 1.00 |
| rs1004202  | 5   | 36065463  | G  | C  | 0.39               | 0.016(0.003)                  | EU                   | 0.31          | 0.005(0.009)       | 0.99 |

Supplementary table 4: Previously reported height SNPs composing GRS1. Position is given in genome build 37. A1 is the reported trait-increasing allele, A2 is the other allele. A1-freq, effects, and SEs, are given in the previously reported discovery study (dscvr) and in the HCHS/SOL. Ethnicity (dscvr) is that of the previously reported study population. Provided imputation info scores are in the HCHS/SOL.

| SNP        | Chr | position  | A1 | A2 | A1-freq<br>(dscvr) | Effect-SE<br>(dscvr) | ethnicity<br>(dscvr) | A1-freq (SOL) | Effect-SE<br>(SOL) | Info |
|------------|-----|-----------|----|----|--------------------|----------------------|----------------------|---------------|--------------------|------|
| rs301901   | 5   | 37046626  | A  | G  | 0.57               | 0.024(0.003)         | EU                   | 0.38          | 0.011(0.009)       | 1.00 |
| rs3812040  | 5   | 39426020  | T  | C  | 0.72               | 0.024(0.003)         | EU                   | 0.76          | 0.034(0.01)        | 1.00 |
| rs17574650 | 5   | 42436916  | C  | A  | 0.11               | 0.038(0.005)         | EU                   | 0.04          | 0.012(0.022)       | 1.00 |
| rs2961830  | 5   | 50454732  | A  | T  | 0.35               | 0.02(0.003)          | EU                   | 0.41          | -0.001(0.008)      | 1.00 |
| rs7704138  | 5   | 54944262  | C  | T  | 0.53               | 0.031(0.005)         | Asian                | 0.42          | -0.003(0.008)      | 1.00 |
| rs7716219  | 5   | 54955071  | T  | C  | 0.31               | 0.03(0.003)          | EU                   | 0.26          | -0.004(0.009)      | 1.00 |
| rs2662027  | 5   | 56254485  | G  | T  | 0.9                | 0.033(0.005)         | EU                   | 0.78          | 0.007(0.01)        | 1.00 |
| rs7727731  | 5   | 64674446  | T  | C  | 0.11               | 0.033(0.005)         | EU                   | 0.12          | -0.006(0.013)      | 1.00 |
| rs10059761 | 5   | 67156083  | G  | A  | 0.73               | 0.02(0.003)          | EU                   | 0.75          | -0.002(0.009)      | 1.00 |
| rs9291926  | 5   | 67599656  | T  | G  | 0.49               | 0.019(0.003)         | EU                   | 0.36          | 0.016(0.009)       | 1.00 |
| rs34651    | 5   | 72144005  | C  | T  | 0.08               | 0.041(0.006)         | EU                   | 0.10          | 0.019(0.014)       | 0.99 |
| rs820848   | 5   | 73964660  | G  | A  | 0.29               | 0.021(0.004)         | EU                   | 0.18          | 0.03(0.011)        | 0.99 |
| rs12519505 | 5   | 77505876  | C  | T  | 0.78               | 0.022(0.004)         | EU                   | 0.76          | 0.021(0.01)        | 1.00 |
| rs7712162  | 5   | 78945171  | T  | C  | 0.19               | 0.023(0.004)         | EU                   | 0.34          | -0.009(0.009)      | 1.00 |
| rs32855    | 5   | 79836192  | A  | G  | 0.78               | 0.024(0.004)         | EU                   | 0.72          | 0.008(0.009)       | 1.00 |
| rs6894139  | 5   | 88327782  | T  | G  | 0.56               | 0.03(0.003)          | EU                   | 0.41          | 0.03(0.008)        | 1.00 |
| rs10037512 | 5   | 88354675  | T  | C  | 0.42               | 0.031(0.005)         | Asian                | 0.40          | 0.03(0.009)        | 1.00 |
| rs2247870  | 5   | 90151589  | A  | G  | 0.55               | 0.016(0.003)         | EU                   | 0.61          | 0.008(0.009)       | 1.00 |
| rs12186664 | 5   | 95630225  | T  | A  | 0.32               | 0.021(0.003)         | EU                   | 0.23          | 0.006(0.01)        | 0.99 |
| rs6594336  | 5   | 108073085 | C  | T  | 0.56               | 0.017(0.003)         | EU                   | 0.44          | 0.023(0.009)       | 1.00 |
| rs13177718 | 5   | 108113344 | C  | T  | 0.93               | 0.043(0.006)         | EU                   | 0.95          | 0.015(0.019)       | 1.00 |
| rs1582931  | 5   | 122657199 | G  | A  | 0.52               | 0.028(0.003)         | EU                   | 0.48          | 0.011(0.008)       | 1.00 |
| rs7708474  | 5   | 122676525 | T  | G  | 0.67               | 0.028(0.005)         | Asian                | 0.73          | 0.004(0.01)        | 1.00 |
| rs6887276  | 5   | 127378294 | G  | C  | 0.45               | 0.018(0.003)         | EU                   | 0.55          | 0.008(0.008)       | 1.00 |
| rs26024    | 5   | 127696022 | C  | A  | 0.35               | 0.023(0.003)         | EU                   | 0.39          | -0.011(0.009)      | 1.00 |
| rs39623    | 5   | 129054621 | A  | T  | 0.08               | 0.034(0.005)         | EU                   | 0.05          | 0.01(0.018)        | 1.00 |
| rs7701414  | 5   | 131585958 | G  | A  | 0.44               | 0.036(0.003)         | EU                   | 0.33          | 0.018(0.009)       | 1.00 |
| rs6596075  | 5   | 131742228 | G  | C  | 0.16               | 0.014(0.004)         | EU                   | 0.22          | -0.004(0.01)       | 0.99 |
| rs537930   | 5   | 134348703 | G  | T  | 0.72               | 0.034(0.006)         | Asian                | 0.76          | 0.022(0.01)        | 1.00 |
| rs526896   | 5   | 134356705 | T  | G  | 0.73               | 0.036(0.003)         | EU                   | 0.70          | 0.017(0.009)       | 1.00 |
| rs9327705  | 5   | 134510303 | A  | G  | 0.23               | 0.02(0.004)          | EU                   | 0.16          | 0.008(0.011)       | 1.00 |

Supplementary table 4: Previously reported height SNPs composing GRS1. Position is given in genome build 37. A1 is the reported trait-increasing allele, A2 is the other allele. A1-freq, effects, and SEs, are given in the previously reported discovery study (dscvr) and in the HCHS/SOL. Ethnicity (dscvr) is that of the previously reported study population. Provided imputation info scores are in the HCHS/SOL.

| SNP        | Chr | position  | A1 | A2 | A1-freq<br>(dscvr) | Effect-SE<br>(dscvr)         | ethnicity<br>(dscvr) | A1-freq (SOL) | Effect-SE<br>(SOL) | Info |
|------------|-----|-----------|----|----|--------------------|------------------------------|----------------------|---------------|--------------------|------|
| rs165189   | 5   | 139145747 | G  | A  | 0.15               | 0.029(0.005)                 | EU                   | 0.12          | 0.004(0.013)       | 1.00 |
| rs4624820  | 5   | 141681788 | A  | G  | 0.52               | 0.018(0.003)                 | EU                   | 0.59          | 0.001(0.008)       | 1.00 |
| rs2974438  | 5   | 168250903 | G  | A  | 0.8                | 0.037(0.004)                 | EU                   | 0.85          | 0.014(0.012)       | 0.99 |
| rs4282339  | 5   | 168256240 | G  | A  | 0.82               | 0.031(0.006)                 | Asian                | 0.85          | 0.011(0.012)       | 1.00 |
| rs4620037  | 5   | 170875097 | A  | C  | 0.8                | 0.032(0.004)                 | EU                   | 0.74          | 0.029(0.009)       | 1.00 |
| rs1529701  | 5   | 171000977 | C  | T  | 0.7                | 0.021(0.003)                 | EU                   | 0.75          | 0.017(0.01)        | 0.99 |
| rs33852    | 5   | 171189571 | G  | A  | 0.33               | 0.03(0.003)                  | EU                   | 0.41          | 0.019(0.009)       | 1.00 |
| rs12153391 | 5   | 171203438 | C  | A  | 0.74               | 0.033(0.004)                 | EU                   | 0.78          | 0.016(0.01)        | 1.00 |
| rs4868126  | 5   | 171283469 | G  | T  | 0.6                | 0.036(0.003)                 | EU                   | 0.64          | 0.016(0.009)       | 1.00 |
| rs1368380  | 5   | 171285632 | T  | C  | 0.44               | 0.032(0.003)                 | EU                   | 0.40          | 0.031(0.009)       | 1.00 |
| rs17075869 | 5   | 172811280 | T  | C  | 0.08               | 0.027(0.005)                 | EU                   | 0.13          | 0.015(0.013)       | 1.00 |
| rs889014   | 5   | 172984114 | C  | T  | 0.56               | 0.039(0.007)                 | Asian                | 0.56          | 0.015(0.008)       | 1.00 |
| rs7733195  | 5   | 172994624 | G  | A  | 0.64               | 0.029(0.003)                 | EU                   | 0.57          | 0.016(0.008)       | 1.00 |
| rs4868645  | 5   | 175947118 | G  | T  | 0.49               | 0.014(0.003)                 | EU                   | 0.49          | 0.006(0.008)       | 1.00 |
| rs422421   | 5   | 176517326 | C  | T  | 0.78               | 0.034(0.004)                 | EU                   | 0.82          | 0.019(0.011)       | 1.00 |
| rs11950938 | 5   | 176576293 | G  | C  | 0.03               | 0.061(0.009)                 | EU                   | 0.01          | 0.016(0.035)       | 1.00 |
| rs12055154 | 5   | 176675423 | A  | G  | 0.97               | 0.059(0.01)                  | EU                   | 0.98          | -0.002(0.031)      | 1.00 |
| rs11750568 | 5   | 178535713 | A  | G  | 0.33               | 0.02(0.003)                  | EU                   | 0.28          | 0.003(0.009)       | 1.00 |
| rs6879260  | 5   | 179731014 | C  | T  | 0.61               | 0.027(0.003)                 | EU                   | 0.61          | 0.007(0.009)       | 1.00 |
| rs932445   | 6   | 2167225   | T  | C  | 0.59               | 0.018(0.003)                 | EU                   | 0.66          | 0.003(0.009)       | 1.00 |
| rs163071   | 6   | 2193062   | C  | G  | 0.98               | 0.061(0.011)                 | EU                   | 0.83          | -0.003(0.011)      | 1.00 |
| rs4246079  | 6   | 6889818   | G  | A  | 0.88               | 0.038(0.005)                 | EU                   | 0.92          | 0.029(0.015)       | 0.99 |
| rs17603945 | 6   | 7213016   | A  | G  | 0.2                | 0.03(0.004)                  | EU                   | 0.07          | 0.008(0.016)       | 1.00 |
| rs9392918  | 6   | 7708631   | C  | T  | 0.47               | 0.038(0.003)                 | EU                   | 0.32          | 0.015(0.009)       | 1.00 |
| rs9328445  | 6   | 7792947   | C  | T  | 0.54               | 0.014(0.003)                 | EU                   | 0.63          | 0.026(0.009)       | 1.00 |
| rs9405356  | 6   | 7804377   | T  | C  | 0.61               | 0.004(0.003)                 | EU                   | 0.55          | 0.005(0.008)       | 0.99 |
| rs17330192 | 6   | 17589375  | C  | T  | 0.28               | 0.019(0.003)                 | EU                   | 0.21          | 0.003(0.01)        | 1.00 |
| rs1047014  | 6   | 19841493  | C  | T  | 0.25               | 0.032(0.004)                 | EU                   | 0.19          | 0.025(0.011)       | 1.00 |
| rs4141885  | 6   | 26157481  | A  | T  | 0.92               | 0.073(0.008)                 | EU                   | 0.80          | 0.026(0.01)        | 0.99 |
| rs806794   | 6   | 26200677  | A  | G  | 0.71;<br>0.27      | 0.06(0.003);<br>0.075(0.006) | EU;<br>Asian         | 0.62          | 0.036(0.008)       | 1.00 |

Supplementary table 4: Previously reported height SNPs composing GRS1. Position is given in genome build 37. A1 is the reported trait-increasing allele, A2 is the other allele. A1-freq, effects, and SEs, are given in the previously reported discovery study (dscvr) and in the HCHS/SOL. Ethnicity (dscvr) is that of the previously reported study population. Provided imputation info scores are in the HCHS/SOL.

| SNP        | Chr | position | A1 | A2 | A1-freq<br>(dscvr) | Effect-SE<br>(dscvr) | ethnicity<br>(dscvr) | A1-freq (SOL) | Effect-SE<br>(SOL) | Info |
|------------|-----|----------|----|----|--------------------|----------------------|----------------------|---------------|--------------------|------|
| rs1233627  | 6   | 28751727 | T  | C  | 0.5                | 0.024(0.003)         | EU                   | 0.39          | -0.002(0.008)      | 1.00 |
| rs9404952  | 6   | 29804165 | A  | G  | 0.44               | 0.018(0.003)         | EU                   | 0.52          | 0.001(0.008)       | 1.00 |
| rs1265097  | 6   | 31106459 | C  | A  | 0.89               | 0.059(0.005)         | EU                   | 0.82          | 0.028(0.01)        | 1.00 |
| rs6457374  | 6   | 31272261 | C  | T  | 0.27               | 0.041(0.003)         | EU                   | 0.15          | 0.011(0.011)       | 1.00 |
| rs2857693  | 6   | 31588384 | G  | T  | 0.62               | 0.034(0.003)         | EU                   | 0.60          | 0.015(0.008)       | 1.00 |
| rs3129254  | 6   | 33108287 | A  | G  | 0.59               | 0.018(0.003)         | EU                   | 0.50          | -0.008(0.008)      | 1.00 |
| rs12204421 | 6   | 33628863 | A  | G  | 0.74               | 0.026(0.003)         | EU                   | 0.77          | 0.028(0.01)        | 1.00 |
| rs3957165  | 6   | 33784864 | T  | C  | 0.81               | 0.022(0.004)         | EU                   | 0.85          | 0.008(0.011)       | 1.00 |
| rs12214804 | 6   | 34188866 | C  | T  | 0.08               | 0.084(0.006)         | EU                   | 0.31          | 0.065(0.009)       | 1.00 |
| rs1776897  | 6   | 34195011 | G  | T  | 0.12               | 0.084(0.008)         | Asian                | 0.31          | 0.065(0.009)       | 1.00 |
| rs1150781  | 6   | 34214322 | C  | G  | 0.42               | 0.044(0.01)          | African              | 0.32          | 0.066(0.009)       | 1.00 |
| rs6918981  | 6   | 34238514 | G  | A  | 0.16               | 0.07(0.006)          | Asian                | 0.39          | 0.048(0.008)       | 1.00 |
| rs3800461  | 6   | 34616322 | C  | G  | 0.13               | 0.053(0.004)         | EU                   | 0.05          | 0.034(0.018)       | 1.00 |
| rs6919534  | 6   | 35246903 | A  | G  | 0.87               | 0.05(0.004)          | EU                   | 0.87          | 0.025(0.012)       | 1.00 |
| rs16874062 | 6   | 35251195 | A  | G  | 0.83               | 0.075(0.013)         | African              | 0.96          | 0.058(0.02)        | 1.00 |
| rs16874262 | 6   | 35265711 | C  | T  | 0.83               | 0.072(0.013)         | African              | 0.96          | 0.056(0.02)        | 1.00 |
| rs6899744  | 6   | 35286295 | G  | T  | 0.98               | 0.132(0.014)         | EU                   | 0.97          | 0.067(0.025)       | 0.99 |
| rs9470003  | 6   | 35337931 | G  | C  | 0.85               | 0.073(0.013)         | African              | 0.97          | 0.082(0.025)       | 1.00 |
| rs9470004  | 6   | 35341850 | C  | T  | 0.83               | 0.078(0.012)         | African              | 0.97          | 0.065(0.023)       | 1.00 |
| rs9462078  | 6   | 35357974 | A  | G  | 0.84               | 0.068(0.013)         | African              | 0.97          | 0.081(0.024)       | 1.00 |
| rs4713902  | 6   | 35614026 | T  | C  | 0.73               | 0.027(0.004)         | EU                   | 0.69          | -0.015(0.009)      | 1.00 |
| rs16895130 | 6   | 41924931 | G  | A  | 0.28               | 0.023(0.003)         | EU                   | 0.18          | 0.004(0.011)       | 1.00 |
| rs1040941  | 6   | 44539761 | A  | G  | 0.4                | 0.016(0.003)         | EU                   | 0.37          | -0.004(0.009)      | 1.00 |
| rs10948222 | 6   | 45244415 | C  | T  | 0.58               | 0.031(0.003)         | EU                   | 0.38          | 0.021(0.008)       | 1.00 |
| rs9395264  | 6   | 47475022 | G  | T  | 0.68               | 0.02(0.003)          | EU                   | 0.53          | 0.007(0.009)       | 1.00 |
| rs12190423 | 6   | 72202711 | G  | C  | 0.62               | 0.017(0.003)         | EU                   | 0.59          | 0.012(0.008)       | 1.00 |
| rs12209223 | 6   | 76164589 | A  | C  | 0.12               | 0.05(0.005)          | EU                   | 0.05          | 0.019(0.019)       | 1.00 |
| rs6903448  | 6   | 76173832 | C  | T  | 0.84               | 0.035(0.004)         | EU                   | 0.80          | 0.004(0.01)        | 1.00 |
| rs648831   | 6   | 80956208 | T  | C  | 0.5                | 0.031(0.003)         | EU                   | 0.42          | 0.006(0.008)       | 1.00 |
| rs1341278  | 6   | 81038921 | G  | T  | 0.06               | 0.056(0.006)         | EU                   | 0.07          | 0.027(0.016)       | 1.00 |
| rs9443804  | 6   | 81315597 | G  | A  | 0.44               | 0.024(0.003)         | EU                   | 0.49          | 0.01(0.008)        | 1.00 |

Supplementary table 4: Previously reported height SNPs composing GRS1. Position is given in genome build 37. A1 is the reported trait-increasing allele, A2 is the other allele. A1-freq, effects, and SEs, are given in the previously reported discovery study (dscvr) and in the HCHS/SOL. Ethnicity (dscvr) is that of the previously reported study population. Provided imputation info scores are in the HCHS/SOL.

| SNP        | Chr | position  | A1 | A2 | A1-freq<br>(dscvr) | Effect-SE<br>(dscvr)          | ethnicity<br>(dscvr) | A1-freq (SOL) | Effect-SE<br>(SOL) | Info |
|------------|-----|-----------|----|----|--------------------|-------------------------------|----------------------|---------------|--------------------|------|
| rs310421   | 6   | 81792063  | T  | G  | 0.54               | 0.032(0.003)                  | EU                   | 0.46          | -0.001(0.008)      | 1.00 |
| rs3828760  | 6   | 82456984  | T  | C  | 0.12               | 0.03(0.005)                   | EU                   | 0.21          | 0.009(0.01)        | 1.00 |
| rs761391   | 6   | 85448103  | C  | T  | 0.46               | 0.019(0.003)                  | EU                   | 0.52          | 0.01(0.008)        | 0.99 |
| rs7759938  | 6   | 105378954 | C  | T  | 0.44               | 0.028(0.005)                  | Asian                | 0.29          | 0.023(0.009)       | 1.00 |
| rs314263   | 6   | 105392745 | C  | T  | 0.32               | 0.043(0.003)                  | EU                   | 0.26          | 0.03(0.009)        | 1.00 |
| rs479744   | 6   | 109020032 | G  | T  | 0.79               | 0.025(0.004)                  | EU                   | 0.67          | 0.02(0.009)        | 1.00 |
| rs6920372  | 6   | 109723939 | G  | A  | 0.59               | 0.025(0.003)                  | EU                   | 0.47          | 0.011(0.009)       | 1.00 |
| rs2145357  | 6   | 116451442 | G  | A  | 0.27               | 0.021(0.003)                  | EU                   | 0.22          | 0.003(0.01)        | 1.00 |
| rs1405212  | 6   | 117490664 | C  | T  | 0.59               | 0.023(0.003)                  | EU                   | 0.76          | 0.022(0.01)        | 1.00 |
| rs389663   | 6   | 117868051 | T  | C  | 0.32               | 0.022(0.003)                  | EU                   | 0.24          | 0.021(0.01)        | 1.00 |
| rs4895801  | 6   | 126216403 | G  | C  | 0.47               | 0.017(0.003)                  | EU                   | 0.54          | 0.018(0.009)       | 1.00 |
| rs1155939  | 6   | 126866133 | A  | C  | 0.5                | 0.042(0.003)                  | EU                   | 0.61          | 0.019(0.009)       | 1.00 |
| rs1415701  | 6   | 130345835 | G  | A  | 0.73;<br>0.61      | 0.044(0.004);<br>0.053(0.005) | EU;<br>Asian         | 0.67          | 0.02(0.009)        | 0.99 |
| rs7740107  | 6   | 130374461 | T  | A  | 0.26               | 0.042(0.003)                  | EU                   | 0.15          | 0.043(0.012)       | 1.00 |
| rs6921207  | 6   | 131327956 | A  | G  | 0.37               | 0.023(0.003)                  | EU                   | 0.45          | 0.014(0.008)       | 1.00 |
| rs7743622  | 6   | 132730372 | G  | C  | 0.58               | 0.017(0.003)                  | EU                   | 0.75          | -0.001(0.01)       | 1.00 |
| rs7745166  | 6   | 142617680 | C  | A  | 0.57               | 0.026(0.003)                  | EU                   | 0.51          | 0.01(0.008)        | 1.00 |
| rs6570507  | 6   | 142679572 | G  | A  | 0.62               | 0.034(0.005)                  | Asian                | 0.60          | 0.029(0.009)       | 1.00 |
| rs4896582  | 6   | 142703877 | G  | A  | 0.7                | 0.051(0.003)                  | EU                   | 0.50          | 0.022(0.009)       | 1.00 |
| rs6911389  | 6   | 144079629 | T  | G  | 0.35               | 0.015(0.003)                  | EU                   | 0.33          | 0.005(0.009)       | 1.00 |
| rs2748483  | 6   | 146335560 | A  | T  | 0.55               | 0.018(0.003)                  | EU                   | 0.69          | 0.022(0.009)       | 1.00 |
| rs6902771  | 6   | 152157881 | T  | C  | 0.46               | 0.031(0.003)                  | EU                   | 0.36          | 0.012(0.009)       | 1.00 |
| rs3020418  | 6   | 152345162 | A  | G  | 0.3                | 0.032(0.003)                  | EU                   | 0.25          | 0.023(0.01)        | 1.00 |
| rs11156098 | 6   | 156587831 | T  | C  | 0.12               | 0.027(0.005)                  | EU                   | 0.04          | 0.018(0.021)       | 0.99 |
| rs1832871  | 6   | 158722034 | A  | G  | 0.34               | 0.024(0.003)                  | EU                   | 0.23          | 0.005(0.01)        | 1.00 |
| rs9456307  | 6   | 158929442 | T  | A  | 0.94               | 0.053(0.007)                  | EU                   | 0.94          | 0.01(0.017)        | 1.00 |
| rs486359   | 6   | 160774441 | C  | G  | 0.49               | 0.016(0.003)                  | EU                   | 0.44          | 0.01(0.008)        | 1.00 |
| rs991946   | 6   | 166329862 | C  | T  | 0.52               | 0.021(0.003)                  | EU                   | 0.52          | 0.006(0.008)       | 0.99 |
| rs2763273  | 6   | 168834623 | C  | T  | 0.76               | 0.022(0.003)                  | EU                   | 0.87          | 0.008(0.013)       | 1.00 |
| rs7774834  | 6   | 169349731 | A  | C  | 0.51               | 0.018(0.003)                  | EU                   | 0.44          | 0(0.008)           | 1.00 |

Supplementary table 4: Previously reported height SNPs composing GRS1. Position is given in genome build 37. A1 is the reported trait-increasing allele, A2 is the other allele. A1-freq, effects, and SEs, are given in the previously reported discovery study (dscvr) and in the HCHS/SOL. Ethnicity (dscvr) is that of the previously reported study population. Provided imputation info scores are in the HCHS/SOL.

| SNP        | Chr | position  | A1 | A2 | A1-freq<br>(dscvr) | Effect-SE<br>(dscvr) | ethnicity<br>(dscvr) | A1-freq (SOL) | Effect-SE<br>(SOL) | Info |
|------------|-----|-----------|----|----|--------------------|----------------------|----------------------|---------------|--------------------|------|
| rs798497   | 7   | 2795957   | A  | G  | 0.7                | 0.057(0.003)         | EU                   | 0.73          | 0.032(0.009)       | 1.00 |
| rs7777484  | 7   | 2814271   | A  | G  | 0.78               | 0.058(0.006)         | Asian                | 0.56          | 0.022(0.008)       | 1.00 |
| rs4725061  | 7   | 8086639   | G  | A  | 0.44               | 0.02(0.003)          | EU                   | 0.36          | 0.015(0.009)       | 0.99 |
| rs929637   | 7   | 12276522  | G  | T  | 0.78               | 0.021(0.004)         | EU                   | 0.81          | -0.006(0.011)      | 1.00 |
| rs17140875 | 7   | 19248278  | G  | T  | 0.95               | 0.043(0.007)         | EU                   | 0.96          | 0.025(0.02)        | 0.96 |
| rs4470914  | 7   | 19616522  | T  | C  | 0.28               | 0.037(0.006)         | Asian                | 0.21          | 0.028(0.01)        | 1.00 |
| rs2390151  | 7   | 19642100  | T  | G  | 0.18               | 0.033(0.004)         | EU                   | 0.22          | 0.022(0.01)        | 1.00 |
| rs3807931  | 7   | 20381674  | A  | G  | 0.45               | 0.027(0.003)         | EU                   | 0.61          | 0.019(0.009)       | 1.00 |
| rs7782764  | 7   | 23475919  | G  | A  | 0.86               | 0(0.004)             | EU                   | 0.91          | 0.003(0.014)       | 1.00 |
| rs12538407 | 7   | 23521316  | A  | G  | 0.6                | 0.032(0.003)         | EU                   | 0.68          | 0.022(0.009)       | 1.00 |
| rs1055144  | 7   | 25871109  | T  | C  | 0.19               | 0.021(0.004)         | EU                   | 0.17          | 0.024(0.011)       | 1.00 |
| rs552707   | 7   | 28205303  | T  | C  | 0.31               | 0.046(0.003)         | EU                   | 0.16          | 0.027(0.011)       | 1.00 |
| rs12533079 | 7   | 28751137  | T  | G  | 0.79               | 0.022(0.004)         | EU                   | 0.88          | 0.001(0.013)       | 1.00 |
| rs6462432  | 7   | 32935524  | A  | G  | 0.39               | 0.017(0.003)         | EU                   | 0.38          | 0.005(0.009)       | 1.00 |
| rs6974574  | 7   | 38110073  | T  | A  | 0.69               | 0.03(0.003)          | EU                   | 0.55          | 0.012(0.008)       | 1.00 |
| rs1007358  | 7   | 46201355  | G  | A  | 0.23               | 0.021(0.004)         | EU                   | 0.21          | 0.016(0.01)        | 1.00 |
| rs6949739  | 7   | 46417403  | T  | A  | 0.91               | 0.038(0.005)         | EU                   | 0.94          | 0.009(0.017)       | 1.00 |
| rs2715094  | 7   | 50730452  | G  | A  | 0.25               | 0.021(0.003)         | EU                   | 0.17          | 0.01(0.011)        | 1.00 |
| rs1113765  | 7   | 55889334  | G  | A  | 0.82               | 0.024(0.004)         | EU                   | 0.64          | 0.005(0.009)       | 1.00 |
| rs12669267 | 7   | 73304636  | C  | T  | 0.87               | 0.029(0.005)         | EU                   | 0.78          | 0.021(0.01)        | 1.00 |
| rs17807185 | 7   | 77308295  | G  | A  | 0.38               | 0.022(0.003)         | EU                   | 0.41          | 0.017(0.008)       | 1.00 |
| rs2888877  | 7   | 92228400  | T  | C  | 0.22               | 0.066(0.004)         | EU                   | 0.15          | 0.025(0.012)       | 0.94 |
| rs42039    | 7   | 92244422  | T  | C  | 0.27               | 0.068(0.003)         | EU                   | 0.17          | 0.027(0.011)       | 1.00 |
| rs2188177  | 7   | 92659160  | T  | C  | 0.47               | 0.014(0.003)         | EU                   | 0.71          | 0.009(0.01)        | 0.98 |
| rs6971575  | 7   | 96039648  | C  | G  | 0.29               | 0.021(0.004)         | EU                   | 0.25          | 0.009(0.009)       | 1.00 |
| rs17250196 | 7   | 99817196  | T  | G  | 0.07               | 0.045(0.007)         | EU                   | 0.03          | -0.003(0.025)      | 0.99 |
| rs6952113  | 7   | 120777619 | G  | A  | 0.62               | 0.018(0.003)         | EU                   | 0.73          | 0.009(0.009)       | 1.00 |
| rs6962887  | 7   | 135045786 | T  | G  | 0.68               | 0.022(0.003)         | EU                   | 0.80          | 0.011(0.011)       | 1.00 |
| rs273945   | 7   | 137611566 | C  | A  | 0.58               | 0.019(0.003)         | EU                   | 0.58          | 0.005(0.009)       | 1.00 |
| rs822531   | 7   | 148629759 | T  | C  | 0.78               | 0.036(0.004)         | EU                   | 0.78          | 0.026(0.01)        | 1.00 |
| rs6955948  | 7   | 150508720 | T  | C  | 0.28               | 0.031(0.003)         | EU                   | 0.44          | 0.013(0.009)       | 1.00 |



Supplementary table 4: Previously reported height SNPs composing GRS1. Position is given in genome build 37. A1 is the reported trait-increasing allele, A2 is the other allele. A1-freq, effects, and SEs, are given in the previously reported discovery study (dscvr) and in the HCHS/SOL. Ethnicity (dscvr) is that of the previously reported study population. Provided imputation info scores are in the HCHS/SOL.

| SNP        | Chr | position  | A1 | A2 | A1-freq<br>(dscvr) | Effect-SE<br>(dscvr) | ethnicity<br>(dscvr) | A1-freq (SOL) | Effect-SE<br>(SOL) | Info |
|------------|-----|-----------|----|----|--------------------|----------------------|----------------------|---------------|--------------------|------|
| rs4875421  | 8   | 4827332   | T  | A  | 0.46               | 0.019(0.003)         | EU                   | 0.62          | 0.003(0.009)       | 1.00 |
| rs429433   | 8   | 8747894   | A  | G  | 0.05               | 0.046(0.007)         | EU                   | 0.04          | 0.057(0.021)       | 1.00 |
| rs7834383  | 8   | 13273477  | T  | G  | 0.36               | 0.022(0.003)         | EU                   | 0.24          | 0.004(0.009)       | 1.00 |
| rs7823327  | 8   | 22562352  | T  | G  | 0.48               | 0.019(0.003)         | EU                   | 0.42          | 0.007(0.008)       | 1.00 |
| rs4273857  | 8   | 23173053  | A  | G  | 0.23               | 0.027(0.003)         | EU                   | 0.17          | 0.011(0.011)       | 1.00 |
| rs17088184 | 8   | 23375235  | G  | C  | 0.17               | 0.024(0.004)         | EU                   | 0.15          | 0(0.011)           | 1.00 |
| rs2013265  | 8   | 24092500  | C  | T  | 0.75               | 0.028(0.003)         | EU                   | 0.84          | 0.006(0.011)       | 1.00 |
| rs3812423  | 8   | 25298710  | G  | C  | 0.64               | 0.021(0.003)         | EU                   | 0.61          | 0.011(0.008)       | 1.00 |
| rs568610   | 8   | 27527995  | T  | C  | 0.24               | 0.022(0.003)         | EU                   | 0.26          | 0.005(0.01)        | 1.00 |
| rs6988484  | 8   | 49413780  | C  | T  | 0.25               | 0.022(0.003)         | EU                   | 0.29          | 0.003(0.009)       | 1.00 |
| rs6999671  | 8   | 56998480  | A  | G  | 0.04               | 0.033(0.008)         | EU                   | 0.03          | 0.041(0.022)       | 1.00 |
| rs10958476 | 8   | 57095808  | C  | T  | 0.21               | 0.051(0.004)         | EU                   | 0.11          | 0.016(0.013)       | 1.00 |
| rs13273123 | 8   | 57100791  | A  | G  | 0.86               | 0.103(0.009)         | Asian                | 0.86          | 0.004(0.012)       | 1.00 |
| rs9650315  | 8   | 57155598  | G  | T  | 0.87               | 0.061(0.004)         | EU                   | 0.82          | 0.023(0.011)       | 1.00 |
| rs7815909  | 8   | 57200362  | A  | G  | 0.87               | 0.111(0.011)         | Asian                | 0.86          | 0.017(0.012)       | 1.00 |
| rs2956605  | 8   | 75883054  | A  | C  | 0.38               | 0.024(0.003)         | EU                   | 0.37          | 0.013(0.009)       | 1.00 |
| rs16939034 | 8   | 76040583  | T  | C  | 0.09               | 0.025(0.006)         | EU                   | 0.07          | 0.026(0.016)       | 1.00 |
| rs4735677  | 8   | 78148191  | T  | A  | 0.28               | 0.037(0.003)         | EU                   | 0.23          | 0.024(0.01)        | 1.00 |
| rs7007200  | 8   | 109784938 | G  | C  | 0.69               | 0.017(0.003)         | EU                   | 0.74          | 0.003(0.009)       | 1.00 |
| rs2737220  | 8   | 116637685 | T  | C  | 0.38               | 0.017(0.003)         | EU                   | 0.32          | 0.035(0.009)       | 1.00 |
| rs1550162  | 8   | 117563532 | G  | A  | 0.29               | 0.024(0.003)         | EU                   | 0.32          | -0.001(0.009)      | 1.00 |
| rs1599473  | 8   | 120475358 | G  | T  | 0.75               | 0.027(0.003)         | EU                   | 0.86          | 0.004(0.012)       | 0.99 |
| rs10283100 | 8   | 120596023 | G  | A  | 0.96               | 0.057(0.008)         | EU                   | 0.97          | -0.004(0.023)      | 1.00 |
| rs11779459 | 8   | 123980551 | T  | C  | 0.35               | 0.016(0.003)         | EU                   | 0.40          | 0.013(0.008)       | 1.00 |
| rs8180991  | 8   | 126500350 | C  | G  | 0.77               | 0.028(0.004)         | EU                   | 0.72          | 0.017(0.01)        | 1.00 |
| rs4733724  | 8   | 130723728 | A  | G  | 0.8                | 0.05(0.004)          | EU                   | 0.57          | 0.021(0.009)       | 1.00 |
| rs2062078  | 8   | 130734461 | G  | T  | 0.27               | 0.035(0.005)         | Asian                | 0.59          | 0.017(0.009)       | 1.00 |
| rs894343   | 8   | 135612595 | A  | G  | 0.29               | 0.012(0.003)         | EU                   | 0.20          | -0.004(0.011)      | 1.00 |
| rs1036821  | 8   | 135650483 | G  | A  | 0.7                | 0.037(0.003)         | EU                   | 0.66          | -0.007(0.009)      | 1.00 |
| rs6577717  | 8   | 135653832 | T  | G  | 0.67               | 0.002(0.003)         | EU                   | 0.71          | 0.005(0.009)       | 1.00 |
| rs11783655 | 8   | 145037573 | T  | A  | 0.61               | 0.018(0.003)         | EU                   | 0.72          | 0.008(0.009)       | 0.99 |

Supplementary table 4: Previously reported height SNPs composing GRS1. Position is given in genome build 37. A1 is the reported trait-increasing allele, A2 is the other allele. A1-freq, effects, and SEs, are given in the previously reported discovery study (dscvr) and in the HCHS/SOL. Ethnicity (dscvr) is that of the previously reported study population. Provided imputation info scores are in the HCHS/SOL.

| SNP        | Chr | position  | A1 | A2 | A1-freq<br>(dscvr) | Effect-SE<br>(dscvr) | ethnicity<br>(dscvr) | A1-freq (SOL) | Effect-SE<br>(SOL) | Info |
|------------|-----|-----------|----|----|--------------------|----------------------|----------------------|---------------|--------------------|------|
| rs7033940  | 9   | 6440419   | G  | C  | 0.87               | 0.024(0.004)         | EU                   | 0.84          | -0.003(0.012)      | 1.00 |
| rs2149163  | 9   | 16455833  | C  | G  | 0.4                | 0.02(0.003)          | EU                   | 0.54          | 0.022(0.009)       | 1.00 |
| rs3927536  | 9   | 16787670  | T  | C  | 0.78               | 0.021(0.004)         | EU                   | 0.51          | 0.004(0.009)       | 1.00 |
| rs10962832 | 9   | 17048990  | A  | T  | 0.84               | 0.024(0.004)         | EU                   | 0.87          | -0.005(0.012)      | 0.94 |
| rs1576900  | 9   | 18629792  | G  | A  | 0.7                | 0.019(0.003)         | EU                   | 0.71          | 0.024(0.009)       | 1.00 |
| rs3763631  | 9   | 35808334  | C  | G  | 0.69               | 0.019(0.003)         | EU                   | 0.74          | 0.032(0.01)        | 1.00 |
| rs10972628 | 9   | 35937611  | G  | A  | 0.74               | 0.017(0.003)         | EU                   | 0.77          | 0.001(0.01)        | 1.00 |
| rs11144688 | 9   | 78542286  | G  | A  | 0.89               | 0.063(0.006)         | EU                   | 0.91          | 0.033(0.014)       | 1.00 |
| rs958225   | 9   | 78759705  | A  | T  | 0.05               | 0.046(0.008)         | EU                   | 0.13          | -0.007(0.013)      | 1.00 |
| rs7853235  | 9   | 86660782  | T  | C  | 0.2                | 0.029(0.004)         | EU                   | 0.15          | 0(0.012)           | 1.00 |
| rs181338   | 9   | 89108161  | T  | C  | 0.51               | 0.028(0.003)         | EU                   | 0.61          | 0.019(0.009)       | 1.00 |
| rs10780910 | 9   | 90849255  | T  | A  | 0.43               | 0.027(0.003)         | EU                   | 0.51          | 0.017(0.009)       | 0.99 |
| rs1571892  | 9   | 94258836  | C  | A  | 0.29               | 0.016(0.003)         | EU                   | 0.33          | 0.015(0.009)       | 1.00 |
| rs7043114  | 9   | 95387983  | C  | T  | 0.44               | 0.028(0.003)         | EU                   | 0.33          | 0.009(0.009)       | 1.00 |
| rs1257763  | 9   | 96893945  | A  | G  | 0.04               | 0.078(0.01)          | EU                   | 0.02          | 0.038(0.033)       | 1.00 |
| rs12347744 | 9   | 97575273  | C  | T  | 0.93               | 0.039(0.006)         | EU                   | 0.91          | 0.022(0.014)       | 1.00 |
| rs4448343  | 9   | 98266370  | G  | A  | 0.35               | 0.035(0.003)         | EU                   | 0.25          | 0.023(0.01)        | 1.00 |
| rs1329393  | 9   | 98318926  | T  | C  | 0.16               | 0.034(0.005)         | EU                   | 0.11          | -0.004(0.013)      | 1.00 |
| rs817300   | 9   | 98380222  | G  | A  | 0.93               | 0.085(0.007)         | EU                   | 0.97          | 0.031(0.023)       | 0.96 |
| rs10990303 | 9   | 98410405  | T  | C  | 0.23               | 0.036(0.004)         | EU                   | 0.28          | -0.002(0.009)      | 1.00 |
| rs7870753  | 9   | 99201585  | G  | A  | 0.22               | 0.042(0.004)         | EU                   | 0.19          | 0.038(0.011)       | 1.00 |
| rs953199   | 9   | 100482976 | C  | A  | 0.76               | 0.018(0.004)         | EU                   | 0.79          | 0.005(0.01)        | 1.00 |
| rs989393   | 9   | 101743336 | T  | C  | 0.71               | 0.022(0.003)         | EU                   | 0.63          | -0.008(0.009)      | 1.00 |
| rs10820814 | 9   | 108304500 | C  | A  | 0.9                | 0.027(0.005)         | EU                   | 0.87          | 0.011(0.012)       | 1.00 |
| rs9409082  | 9   | 108901049 | C  | T  | 0.76               | 0.028(0.004)         | EU                   | 0.76          | 0.02(0.01)         | 1.00 |
| rs902143   | 9   | 109181911 | T  | C  | 0.45               | 0.02(0.003)          | EU                   | 0.42          | 0.019(0.009)       | 1.00 |
| rs2451948  | 9   | 109518208 | G  | A  | 0.16               | 0.022(0.004)         | EU                   | 0.12          | 0(0.013)           | 1.00 |
| rs7027110  | 9   | 109599046 | A  | G  | 0.23               | 0.032(0.003)         | EU                   | 0.16          | 0.006(0.011)       | 1.00 |
| rs3739707  | 9   | 113792706 | C  | A  | 0.75               | 0.024(0.004)         | EU                   | 0.72          | 0.004(0.009)       | 1.00 |
| rs999599   | 9   | 117011595 | T  | C  | 0.37               | 0.016(0.003)         | EU                   | 0.26          | -0.01(0.009)       | 1.00 |
| rs10759774 | 9   | 118169080 | A  | G  | 0.66               | 0.011(0.003)         | EU                   | 0.65          | 0.003(0.009)       | 0.99 |

Supplementary table 4: Previously reported height SNPs composing GRS1. Position is given in genome build 37. A1 is the reported trait-increasing allele, A2 is the other allele. A1-freq, effects, and SEs, are given in the previously reported discovery study (dscvr) and in the HCHS/SOL. Ethnicity (dscvr) is that of the previously reported study population. Provided imputation info scores are in the HCHS/SOL.

| SNP        | Chr | position  | A1 | A2 | A1-freq<br>(dscvr) | Effect-SE<br>(dscvr) | ethnicity<br>(dscvr) | A1-freq (SOL) | Effect-SE<br>(SOL) | Info |
|------------|-----|-----------|----|----|--------------------|----------------------|----------------------|---------------|--------------------|------|
| rs10119624 | 9   | 118305438 | A  | G  | 0.67               | 0.024(0.003)         | EU                   | 0.61          | 0.018(0.008)       | 1.00 |
| rs12344396 | 9   | 118921327 | C  | G  | 0.62               | 0.018(0.003)         | EU                   | 0.35          | 0.008(0.009)       | 0.99 |
| rs7033487  | 9   | 119129257 | T  | C  | 0.79               | 0.037(0.004)         | EU                   | 0.91          | 0.051(0.014)       | 0.98 |
| rs1742829  | 9   | 119422807 | T  | A  | 0.08               | 0.037(0.006)         | EU                   | 0.06          | 0.039(0.017)       | 1.00 |
| rs10817960 | 9   | 119688061 | A  | G  | 0.16               | 0.023(0.004)         | EU                   | 0.13          | -0.007(0.012)      | 1.00 |
| rs7466269  | 9   | 133464084 | A  | G  | 0.64               | 0.033(0.003)         | EU                   | 0.64          | 0.016(0.009)       | 1.00 |
| rs3132297  | 9   | 137301866 | G  | A  | 0.83               | 0.023(0.004)         | EU                   | 0.81          | -0.019(0.011)      | 0.99 |
| rs7849585  | 9   | 139111870 | T  | G  | 0.33               | 0.036(0.003)         | EU                   | 0.47          | 0.01(0.008)        | 1.00 |
| rs10858250 | 9   | 139119215 | G  | A  | 0.25               | 0.052(0.005)         | Asian                | 0.34          | 0.008(0.009)       | 1.00 |
| rs3812591  | 9   | 139341612 | C  | T  | 0.27               | 0.024(0.003)         | EU                   | 0.20          | 0.016(0.01)        | 1.00 |
| rs4332428  | 10  | 4965434   | A  | G  | 0.88               | 0.036(0.004)         | EU                   | 0.88          | 0.029(0.012)       | 1.00 |
| rs12779328 | 10  | 12943973  | C  | T  | 0.72               | 0.028(0.003)         | EU                   | 0.81          | 0.032(0.011)       | 1.00 |
| rs4350272  | 10  | 25056118  | A  | G  | 0.28               | 0.02(0.003)          | EU                   | 0.16          | 0.002(0.012)       | 0.99 |
| rs7069985  | 10  | 27890831  | G  | A  | 0.25               | 0.023(0.003)         | EU                   | 0.23          | 0.014(0.01)        | 1.00 |
| rs10995319 | 10  | 52762887  | T  | C  | 0.76               | 0.019(0.003)         | EU                   | 0.78          | 0.003(0.01)        | 1.00 |
| rs1171615  | 10  | 61469090  | C  | T  | 0.22               | 0.022(0.004)         | EU                   | 0.17          | 0.025(0.011)       | 1.00 |
| rs10997979 | 10  | 69937192  | G  | A  | 0.5                | 0.021(0.003)         | EU                   | 0.40          | 0.006(0.008)       | 1.00 |
| rs4746769  | 10  | 70196580  | T  | C  | 0.86               | 0.029(0.004)         | EU                   | 0.75          | 0.005(0.01)        | 1.00 |
| rs1815314  | 10  | 80928793  | G  | A  | 0.58               | 0.022(0.003)         | EU                   | 0.65          | 0.019(0.009)       | 1.00 |
| rs703985   | 10  | 80940740  | T  | A  | 0.41               | 0.006(0.003)         | EU                   | 0.37          | -0.007(0.009)      | 0.99 |
| rs1923367  | 10  | 81132829  | G  | C  | 0.52               | 0.03(0.003)          | EU                   | 0.34          | 0.025(0.009)       | 1.00 |
| rs2631676  | 10  | 93037409  | G  | A  | 0.19               | 0.028(0.004)         | EU                   | 0.15          | 0.022(0.011)       | 1.00 |
| rs915506   | 10  | 97805074  | G  | A  | 0.65               | 0.021(0.003)         | EU                   | 0.68          | 0.025(0.009)       | 1.00 |
| rs11599750 | 10  | 101805442 | C  | T  | 0.61               | 0.023(0.003)         | EU                   | 0.56          | 0.009(0.008)       | 1.00 |
| rs10883563 | 10  | 102684380 | A  | C  | 0.55               | 0.023(0.003)         | EU                   | 0.42          | 0.014(0.009)       | 1.00 |
| rs7899004  | 10  | 104341435 | T  | C  | 0.56               | 0.024(0.003)         | EU                   | 0.47          | 0.016(0.009)       | 1.00 |
| rs6584575  | 10  | 105577409 | A  | G  | 0.1                | 0.034(0.005)         | EU                   | 0.11          | 0.004(0.013)       | 0.99 |
| rs11198820 | 10  | 120961043 | C  | G  | 0.11               | 0.025(0.005)         | EU                   | 0.13          | 0.014(0.012)       | 1.00 |
| rs291979   | 10  | 121129797 | A  | G  | 0.23               | 0.029(0.004)         | EU                   | 0.18          | 0.021(0.011)       | 1.00 |
| rs1614303  | 10  | 123396806 | T  | G  | 0.83               | 0.022(0.004)         | EU                   | 0.79          | 0.005(0.01)        | 1.00 |
| rs7097701  | 10  | 124171857 | C  | T  | 0.49               | 0.015(0.003)         | EU                   | 0.56          | 0.008(0.009)       | 1.00 |

Supplementary table 4: Previously reported height SNPs composing GRS1. Position is given in genome build 37. A1 is the reported trait-increasing allele, A2 is the other allele. A1-freq, effects, and SEs, are given in the previously reported discovery study (dscvr) and in the HCHS/SOL. Ethnicity (dscvr) is that of the previously reported study population. Provided imputation info scores are in the HCHS/SOL.

| SNP        | Chr | position  | A1 | A2 | A1-freq<br>(dscvr) | Effect-SE<br>(dscvr)          | ethnicity<br>(dscvr) | A1-freq (SOL) | Effect-SE<br>(SOL) | Info |
|------------|-----|-----------|----|----|--------------------|-------------------------------|----------------------|---------------|--------------------|------|
| rs10794175 | 10  | 126358073 | T  | G  | 0.43               | 0.02(0.003)                   | EU                   | 0.50          | 0.004(0.008)       | 1.00 |
| rs11245515 | 10  | 126824068 | T  | C  | 0.56               | 0.017(0.003)                  | EU                   | 0.66          | 0.006(0.009)       | 1.00 |
| rs11244750 | 10  | 127673877 | T  | C  | 0.32               | 0.018(0.003)                  | EU                   | 0.21          | 0.018(0.01)        | 1.00 |
| rs2272566  | 11  | 244552    | A  | G  | 0.48               | 0.016(0.003)                  | EU                   | 0.38          | 0.018(0.009)       | 1.00 |
| rs2735469  | 11  | 2022804   | A  | G  | 0.16               | 0.029(0.004)                  | EU                   | 0.09          | 0.035(0.014)       | 1.00 |
| rs4320932  | 11  | 2171601   | T  | C  | 0.82               | 0.029(0.004)                  | EU                   | 0.84          | 0.017(0.011)       | 1.00 |
| rs17659078 | 11  | 2284590   | A  | C  | 0.27               | 0.021(0.003)                  | EU                   | 0.20          | 0.008(0.01)        | 0.99 |
| rs2237886  | 11  | 2810731   | T  | C  | 0.11               | 0.043(0.005)                  | EU                   | 0.09          | 0.016(0.014)       | 1.00 |
| rs6485978  | 11  | 12678415  | C  | T  | 0.46               | 0.023(0.003)                  | EU                   | 0.45          | 0.014(0.008)       | 1.00 |
| rs2099745  | 11  | 12924265  | G  | A  | 0.92               | 0.036(0.006)                  | EU                   | 0.89          | 0.015(0.014)       | 1.00 |
| rs10766065 | 11  | 13277961  | C  | T  | 0.27               | 0.018(0.003)                  | EU                   | 0.32          | 0.009(0.009)       | 1.00 |
| rs7126398  | 11  | 14268729  | C  | G  | 0.08               | 0.041(0.006)                  | EU                   | 0.06          | 0.008(0.017)       | 0.98 |
| rs2915404  | 11  | 14404825  | T  | C  | 0.4                | 0.014(0.003)                  | EU                   | 0.44          | 0.017(0.009)       | 1.00 |
| rs757081   | 11  | 17351683  | G  | C  | 0.34               | 0.024(0.003)                  | EU                   | 0.29          | 0.001(0.009)       | 1.00 |
| rs10767838 | 11  | 30347927  | A  | G  | 0.72               | 0.025(0.003)                  | EU                   | 0.70          | 0.015(0.009)       | 1.00 |
| rs3802758  | 11  | 45936035  | A  | G  | 0.94               | 0.039(0.007)                  | EU                   | 0.66          | 0.012(0.009)       | 1.00 |
| rs1681630  | 11  | 47969152  | T  | C  | 0.34               | 0.028(0.003)                  | EU                   | 0.33          | 0(0.009)           | 1.00 |
| rs1945237  | 11  | 56230069  | C  | T  | 0.09               | 0.022(0.005)                  | EU                   | 0.04          | 0.032(0.02)        | 1.00 |
| rs3782089  | 11  | 65336819  | C  | T  | 0.94               | 0.053(0.007)                  | EU                   | 0.95          | 0.01(0.019)        | 1.00 |
| rs7112925  | 11  | 66826160  | C  | T  | 0.64               | 0.024(0.003)                  | EU                   | 0.68          | -0.003(0.009)      | 1.00 |
| rs2510396  | 11  | 68417652  | C  | G  | 0.86               | 0.029(0.004)                  | EU                   | 0.84          | 0.021(0.011)       | 1.00 |
| rs3750972  | 11  | 68830628  | G  | T  | 0.48               | 0.019(0.003)                  | EU                   | 0.57          | 0.011(0.009)       | 0.99 |
| rs4357716  | 11  | 69163161  | T  | C  | 0.14               | 0.031(0.005)                  | EU                   | 0.09          | 0.001(0.015)       | 1.00 |
| rs2509133  | 11  | 69933717  | C  | T  | 0.5                | 0.019(0.003)                  | EU                   | 0.51          | -0.002(0.008)      | 1.00 |
| rs11236294 | 11  | 74739934  | T  | G  | 0.29               | 0.019(0.003)                  | EU                   | 0.41          | 0.006(0.009)       | 1.00 |
| rs606452   | 11  | 75276178  | A  | C  | 0.14;<br>0.47      | 0.043(0.004);<br>0.039(0.005) | EU;<br>Asian         | 0.27          | 0.037(0.009)       | 1.00 |
| rs632124   | 11  | 118613235 | A  | T  | 0.42               | 0.023(0.003)                  | EU                   | 0.52          | 0.008(0.009)       | 1.00 |
| rs2510897  | 11  | 118644582 | C  | A  | 0.4                | 0.029(0.005)                  | Asian                | 0.52          | 0.007(0.009)       | 1.00 |
| rs10790381 | 11  | 120257495 | A  | G  | 0.82               | 0.027(0.004)                  | EU                   | 0.82          | 0.016(0.011)       | 1.00 |
| rs1461503  | 11  | 122845075 | C  | A  | 0.57               | 0.018(0.003)                  | EU                   | 0.38          | 0.012(0.009)       | 1.00 |

Supplementary table 4: Previously reported height SNPs composing GRS1. Position is given in genome build 37. A1 is the reported trait-increasing allele, A2 is the other allele. A1-freq, effects, and SEs, are given in the previously reported discovery study (dscvr) and in the HCHS/SOL. Ethnicity (dscvr) is that of the previously reported study population. Provided imputation info scores are in the HCHS/SOL.

| SNP        | Chr | position  | A1 | A2 | A1-freq<br>(dscvr) | Effect-SE<br>(dscvr) | ethnicity<br>(dscvr) | A1-freq (SOL) | Effect-SE<br>(SOL) | Info |
|------------|-----|-----------|----|----|--------------------|----------------------|----------------------|---------------|--------------------|------|
| rs11221442 | 11  | 128577624 | G  | C  | 0.75               | 0.027(0.004)         | EU                   | 0.83          | -0.009(0.011)      | 1.00 |
| rs11612228 | 12  | 576984    | T  | C  | 0.38               | 0.02(0.003)          | EU                   | 0.22          | 0.006(0.01)        | 0.99 |
| rs7299326  | 12  | 1573005   | C  | T  | 0.95               | 0.041(0.007)         | EU                   | 0.87          | 0(0.013)           | 1.00 |
| rs2856321  | 12  | 11855773  | G  | A  | 0.36               | 0.031(0.003)         | EU                   | 0.36          | 0.018(0.009)       | 1.00 |
| rs1420023  | 12  | 12876111  | C  | G  | 0.88               | 0.028(0.005)         | EU                   | 0.93          | 0.013(0.016)       | 0.98 |
| rs12228415 | 12  | 14520701  | G  | A  | 0.45               | 0.015(0.003)         | EU                   | 0.36          | 0.019(0.009)       | 1.00 |
| rs4326884  | 12  | 20536371  | A  | G  | 0.51               | 0.019(0.003)         | EU                   | 0.37          | 0.02(0.009)        | 0.99 |
| rs10770705 | 12  | 20857467  | A  | C  | 0.34               | 0.03(0.003)          | EU                   | 0.42          | 0.012(0.009)       | 1.00 |
| rs11047239 | 12  | 24207780  | G  | C  | 0.3                | 0.023(0.003)         | EU                   | 0.27          | 0.001(0.009)       | 1.00 |
| rs1861908  | 12  | 27997409  | C  | G  | 0.2                | 0.023(0.004)         | EU                   | 0.13          | 0.011(0.012)       | 0.99 |
| rs10492364 | 12  | 28112256  | T  | C  | 0.26               | 0.017(0.004)         | EU                   | 0.21          | 0.019(0.011)       | 1.00 |
| rs11049611 | 12  | 28600244  | C  | T  | 0.7                | 0.038(0.003)         | EU                   | 0.85          | 0.015(0.012)       | 1.00 |
| rs12820411 | 12  | 28952342  | G  | C  | 0.68               | 0.021(0.003)         | EU                   | 0.74          | 0.001(0.01)        | 0.99 |
| rs10843390 | 12  | 29496991  | T  | C  | 0.29               | 0.021(0.003)         | EU                   | 0.32          | -0.007(0.009)      | 1.00 |
| rs10880969 | 12  | 46827023  | C  | T  | 0.7                | 0.024(0.003)         | EU                   | 0.75          | 0.01(0.01)         | 1.00 |
| rs11170624 | 12  | 54030238  | T  | G  | 0.24               | 0.041(0.005)         | Asian                | 0.24          | 0.001(0.01)        | 1.00 |
| rs1971762  | 12  | 54058238  | T  | C  | 0.44               | 0.041(0.005)         | Asian                | 0.36          | -0.008(0.009)      | 1.00 |
| rs2306694  | 12  | 56680636  | G  | A  | 0.07               | 0.046(0.006)         | EU                   | 0.04          | 0.003(0.021)       | 1.00 |
| rs2066808  | 12  | 56737973  | G  | A  | 0.1                | 0.081(0.012)         | Asian                | 0.13          | -0.005(0.013)      | 1.00 |
| rs10877030 | 12  | 58256714  | T  | G  | 0.68               | 0.023(0.003)         | EU                   | 0.56          | 0.014(0.009)       | 0.99 |
| rs17122659 | 12  | 59956923  | G  | A  | 0.12               | 0.031(0.005)         | EU                   | 0.08          | 0.008(0.016)       | 1.00 |
| rs2164968  | 12  | 65677086  | C  | T  | 0.38               | 0.018(0.003)         | EU                   | 0.21          | 0.004(0.01)        | 1.00 |
| rs7979673  | 12  | 66227257  | C  | T  | 0.68               | 0.056(0.012)         | African              | 0.86          | 0.023(0.012)       | 1.00 |
| rs12298541 | 12  | 66306441  | A  | C  | 0.23               | 0.055(0.012)         | African              | 0.28          | 0.03(0.009)        | 1.00 |
| rs867633   | 12  | 66354911  | G  | A  | 0.65               | 0.043(0.01)          | African              | 0.48          | 0.036(0.008)       | 1.00 |
| rs8756     | 12  | 66359752  | C  | A  | 0.49               | 0.058(0.003)         | EU                   | 0.36          | 0.038(0.009)       | 1.00 |
| rs11175992 | 12  | 66391396  | T  | A  | 0.72               | 0.048(0.004)         | EU                   | 0.74          | 0.008(0.01)        | 1.00 |
| rs10748128 | 12  | 69827658  | T  | G  | 0.35               | 0.038(0.003)         | EU                   | 0.37          | 0.018(0.009)       | 1.00 |
| rs17783015 | 12  | 90231386  | C  | T  | 0.84               | 0.023(0.004)         | EU                   | 0.88          | -0.003(0.012)      | 1.00 |
| rs11107062 | 12  | 93919840  | T  | C  | 0.21               | 0.028(0.004)         | EU                   | 0.08          | 0.028(0.015)       | 0.97 |
| rs3825199  | 12  | 93976954  | G  | A  | 0.23               | 0.051(0.004)         | EU                   | 0.24          | 0.01(0.01)         | 1.00 |

Supplementary table 4: Previously reported height SNPs composing GRS1. Position is given in genome build 37. A1 is the reported trait-increasing allele, A2 is the other allele. A1-freq, effects, and SEs, are given in the previously reported discovery study (dscvr) and in the HCHS/SOL. Ethnicity (dscvr) is that of the previously reported study population. Provided imputation info scores are in the HCHS/SOL.

| SNP        | Chr | position  | A1 | A2 | A1-freq<br>(dscvr) | Effect-SE<br>(dscvr)         | ethnicity<br>(dscvr) | A1-freq (SOL) | Effect-SE<br>(SOL) | Info |
|------------|-----|-----------|----|----|--------------------|------------------------------|----------------------|---------------|--------------------|------|
| rs11107116 | 12  | 93978504  | T  | G  | 0.31               | 0.035(0.005)                 | Asian                | 0.21          | 0.017(0.01)        | 1.00 |
| rs10859567 | 12  | 94126925  | T  | G  | 0.56               | 0.035(0.003)                 | EU                   | 0.60          | 0.013(0.008)       | 1.00 |
| rs7971536  | 12  | 102373788 | T  | A  | 0.54               | 0.028(0.003)                 | EU                   | 0.51          | -0.001(0.008)      | 0.99 |
| rs2271266  | 12  | 102506044 | T  | C  | 0.67               | 0.075(0.005)                 | Asian                | 0.90          | 0.039(0.014)       | 1.00 |
| rs7313075  | 12  | 102630679 | C  | A  | 0.68               | 0.073(0.005)                 | Asian                | 0.77          | 0.017(0.01)        | 1.00 |
| rs833706   | 12  | 103062597 | A  | G  | 0.75               | 0.021(0.004)                 | EU                   | 0.81          | 0.023(0.011)       | 0.99 |
| rs2164747  | 12  | 104344836 | G  | A  | 0.1                | 0.029(0.005)                 | EU                   | 0.14          | 0.016(0.012)       | 1.00 |
| rs2888893  | 12  | 107338631 | C  | T  | 0.51               | 0.017(0.003)                 | EU                   | 0.29          | 0.012(0.01)        | 1.00 |
| rs11616067 | 12  | 116393174 | A  | G  | 0.76               | 0.02(0.004)                  | EU                   | 0.85          | 0.025(0.011)       | 1.00 |
| rs4767473  | 12  | 117365506 | A  | G  | 0.86               | 0.024(0.004)                 | EU                   | 0.86          | 0.017(0.012)       | 0.99 |
| rs497273   | 12  | 121204682 | C  | G  | 0.38               | 0.018(0.003)                 | EU                   | 0.19          | 0.007(0.011)       | 1.00 |
| rs11835818 | 12  | 122494809 | C  | T  | 0.49               | 0.022(0.003)                 | EU                   | 0.42          | -0.005(0.009)      | 1.00 |
| rs7980687  | 12  | 123822711 | A  | G  | 0.2                | 0.039(0.004)                 | EU                   | 0.22          | 0.006(0.01)        | 1.00 |
| rs11057552 | 12  | 124750895 | A  | T  | 0.18               | 0.028(0.004)                 | EU                   | 0.19          | -0.004(0.01)       | 0.99 |
| rs1809889  | 12  | 124801226 | T  | C  | 0.29               | 0.032(0.003)                 | EU                   | 0.38          | 0.015(0.009)       | 1.00 |
| rs1199734  | 13  | 21570246  | G  | T  | 0.81               | 0.022(0.004)                 | EU                   | 0.68          | 0.005(0.009)       | 1.00 |
| rs11618507 | 13  | 30172751  | T  | G  | 0.25               | 0.023(0.004)                 | EU                   | 0.20          | -0.003(0.011)      | 1.00 |
| rs12323101 | 13  | 33143406  | A  | G  | 0.37               | 0.02(0.003)                  | EU                   | 0.25          | 0.026(0.01)        | 1.00 |
| rs12863103 | 13  | 33723244  | C  | T  | 0.71               | 0.019(0.003)                 | EU                   | 0.68          | 0.003(0.009)       | 1.00 |
| rs6561319  | 13  | 47112120  | A  | C  | 0.64               | 0.021(0.003)                 | EU                   | 0.69          | 0.009(0.009)       | 1.00 |
| rs12871822 | 13  | 49201040  | G  | T  | 0.34               | 0.017(0.003)                 | EU                   | 0.30          | 0.005(0.009)       | 1.00 |
| rs7334755  | 13  | 50469913  | C  | T  | 0.81               | 0.032(0.004)                 | EU                   | 0.84          | 0.041(0.011)       | 0.99 |
| rs2687950  | 13  | 50718468  | T  | C  | 0.25               | 0.036(0.003)                 | EU                   | 0.19          | 0.01(0.011)        | 1.00 |
| rs1753637  | 13  | 51084173  | T  | G  | 0.31               | 0.036(0.003)                 | EU                   | 0.35          | 0.016(0.009)       | 1.00 |
| rs3118905  | 13  | 51105334  | G  | A  | 0.72               | 0.058(0.003)                 | EU                   | 0.81          | 0.031(0.011)       | 1.00 |
| rs4883972  | 13  | 75058481  | C  | G  | 0.55               | 0.019(0.003)                 | EU                   | 0.61          | 0.015(0.008)       | 1.00 |
| rs3818416  | 13  | 78474468  | C  | A  | 0.78               | 0.021(0.004)                 | EU                   | 0.80          | 0.001(0.011)       | 1.00 |
| rs11616380 | 13  | 80705315  | T  | G  | 0.28               | 0.019(0.003)                 | EU                   | 0.31          | 0.012(0.009)       | 0.99 |
| rs6563199  | 13  | 81550449  | T  | C  | 0.35               | 0.018(0.003)                 | EU                   | 0.36          | 0.007(0.009)       | 0.99 |
| rs7319045  | 13  | 92024574  | A  | G  | 0.39;<br>0.47      | 0.024(0.003);<br>0.03(0.005) | EU;<br>Asian         | 0.40          | 0.011(0.009)       | 1.00 |

Supplementary table 4: Previously reported height SNPs composing GRS1. Position is given in genome build 37. A1 is the reported trait-increasing allele, A2 is the other allele. A1-freq, effects, and SEs, are given in the previously reported discovery study (dscvr) and in the HCHS/SOL. Ethnicity (dscvr) is that of the previously reported study population. Provided imputation info scores are in the HCHS/SOL.

| SNP        | Chr | position  | A1 | A2 | A1-freq<br>(dscvr) | Effect-SE<br>(dscvr) | ethnicity<br>(dscvr) | A1-freq (SOL) | Effect-SE<br>(SOL) | Info |
|------------|-----|-----------|----|----|--------------------|----------------------|----------------------|---------------|--------------------|------|
| rs7985356  | 13  | 115027462 | T  | A  | 0.77               | 0.023(0.003)         | EU                   | 0.68          | 0.018(0.009)       | 1.00 |
| rs17792664 | 14  | 21890683  | G  | C  | 0.14               | 0.032(0.004)         | EU                   | 0.06          | -0.002(0.018)      | 1.00 |
| rs8017130  | 14  | 23759156  | G  | A  | 0.69               | 0.023(0.003)         | EU                   | 0.58          | 0.004(0.009)       | 1.00 |
| rs1950500  | 14  | 24830850  | T  | C  | 0.3                | 0.031(0.003)         | EU                   | 0.41          | 0.006(0.009)       | 1.00 |
| rs12435366 | 14  | 35838389  | C  | T  | 0.73               | 0.023(0.004)         | EU                   | 0.84          | 0.012(0.011)       | 1.00 |
| rs10131337 | 14  | 37144516  | T  | C  | 0.24               | 0.027(0.004)         | EU                   | 0.13          | 0.003(0.012)       | 1.00 |
| rs6571772  | 14  | 37477461  | A  | T  | 0.7                | 0.018(0.003)         | EU                   | 0.62          | 0(0.009)           | 1.00 |
| rs4901537  | 14  | 55203126  | G  | C  | 0.26               | 0.022(0.004)         | EU                   | 0.18          | 0.018(0.011)       | 0.94 |
| rs8006657  | 14  | 55245149  | G  | A  | 0.59               | 0.022(0.003)         | EU                   | 0.61          | -0.004(0.009)      | 1.00 |
| rs11624136 | 14  | 59688820  | A  | G  | 0.5                | 0.018(0.003)         | EU                   | 0.50          | 0.011(0.008)       | 1.00 |
| rs2093210  | 14  | 60957279  | C  | T  | 0.42               | 0.039(0.003)         | EU                   | 0.44          | 0.025(0.009)       | 1.00 |
| rs2781373  | 14  | 65568215  | G  | A  | 0.62               | 0.021(0.003)         | EU                   | 0.67          | 0.015(0.009)       | 1.00 |
| rs1980850  | 14  | 68647188  | G  | A  | 0.83               | 0.03(0.004)          | EU                   | 0.80          | 0.015(0.01)        | 1.00 |
| rs2058092  | 14  | 73932966  | T  | C  | 0.56               | 0.017(0.003)         | EU                   | 0.37          | 0.001(0.009)       | 1.00 |
| rs699371   | 14  | 74989433  | C  | T  | 0.8                | 0.05(0.007)          | Asian                | 0.67          | 0.004(0.009)       | 1.00 |
| rs862034   | 14  | 74990746  | G  | A  | 0.64               | 0.028(0.003)         | EU                   | 0.63          | 0.005(0.008)       | 1.00 |
| rs10140101 | 14  | 75038689  | T  | C  | 0.44               | 0.014(0.003)         | EU                   | 0.55          | 0.007(0.009)       | 1.00 |
| rs7153027  | 14  | 92427222  | A  | C  | 0.74               | 0.043(0.005)         | Asian                | 0.68          | 0.018(0.009)       | 1.00 |
| rs7154721  | 14  | 92427348  | T  | C  | 0.57               | 0.027(0.003)         | EU                   | 0.68          | 0.018(0.009)       | 1.00 |
| rs7158300  | 14  | 92482948  | C  | T  | 0.69               | 0.054(0.005)         | Asian                | 0.83          | 0.018(0.011)       | 1.00 |
| rs1190545  | 14  | 102904179 | C  | G  | 0.74               | 0.025(0.003)         | EU                   | 0.54          | 0.016(0.009)       | 1.00 |
| rs12882130 | 14  | 103878774 | C  | G  | 0.63               | 0.025(0.003)         | EU                   | 0.69          | 0.01(0.009)        | 0.90 |
| rs10152739 | 15  | 38483866  | T  | A  | 0.25               | 0.022(0.003)         | EU                   | 0.20          | 0(0.01)            | 1.00 |
| rs316618   | 15  | 41796498  | T  | A  | 0.78               | 0.026(0.004)         | EU                   | 0.83          | -0.007(0.011)      | 0.98 |
| rs1036477  | 15  | 48914926  | A  | G  | 0.9                | 0.032(0.005)         | EU                   | 0.80          | 0(0.011)           | 1.00 |
| rs10744956 | 15  | 51269629  | G  | A  | 0.78               | 0.028(0.004)         | EU                   | 0.75          | 0.01(0.01)         | 1.00 |
| rs16964211 | 15  | 51530495  | G  | A  | 0.95               | 0.057(0.007)         | EU                   | 0.90          | 0.04(0.014)        | 1.00 |
| rs10519302 | 15  | 51599683  | A  | G  | 0.68               | 0.057(0.005)         | Asian                | 0.84          | 0.034(0.012)       | 1.00 |
| rs782930   | 15  | 61408362  | G  | A  | 0.65               | 0.02(0.003)          | EU                   | 0.55          | -0.006(0.008)      | 1.00 |
| rs7177711  | 15  | 62379971  | A  | G  | 0.54               | 0.021(0.003)         | EU                   | 0.47          | -0.002(0.009)      | 1.00 |
| rs7162825  | 15  | 63439186  | T  | C  | 0.5                | 0.016(0.003)         | EU                   | 0.31          | 0.004(0.01)        | 1.00 |

Supplementary table 4: Previously reported height SNPs composing GRS1. Position is given in genome build 37. A1 is the reported trait-increasing allele, A2 is the other allele. A1-freq, effects, and SEs, are given in the previously reported discovery study (dscvr) and in the HCHS/SOL. Ethnicity (dscvr) is that of the previously reported study population. Provided imputation info scores are in the HCHS/SOL.

| SNP        | Chr | position  | A1 | A2 | A1-freq<br>(dscvr) | Effect-SE<br>(dscvr)          | ethnicity<br>(dscvr) | A1-freq (SOL) | Effect-SE<br>(SOL) | Info |
|------------|-----|-----------|----|----|--------------------|-------------------------------|----------------------|---------------|--------------------|------|
| rs17264185 | 15  | 66997087  | G  | A  | 0.27               | 0.02(0.003)                   | EU                   | 0.20          | 0.02(0.01)         | 1.00 |
| rs731874   | 15  | 67446831  | A  | G  | 0.28               | 0.018(0.003)                  | EU                   | 0.15          | 0.037(0.012)       | 1.00 |
| rs10152591 | 15  | 70048157  | A  | C  | 0.9                | 0.044(0.005)                  | EU                   | 0.94          | 0.003(0.016)       | 1.00 |
| rs975210   | 15  | 70364352  | A  | G  | 0.18               | 0.035(0.004)                  | EU                   | 0.10          | 0.02(0.014)        | 1.00 |
| rs11634405 | 15  | 72084693  | A  | G  | 0.36               | 0.02(0.003)                   | EU                   | 0.45          | 0.004(0.009)       | 1.00 |
| rs12904334 | 15  | 72842705  | A  | G  | 0.02               | 0.084(0.013)                  | EU                   | 0.01          | 0.054(0.043)       | 1.00 |
| rs4337252  | 15  | 74226765  | C  | G  | 0.5                | 0.026(0.003)                  | EU                   | 0.50          | 0.013(0.008)       | 1.00 |
| rs5742915  | 15  | 74336633  | C  | T  | 0.47               | 0.035(0.003)                  | EU                   | 0.31          | 0.02(0.009)        | 1.00 |
| rs16968242 | 15  | 76740219  | G  | C  | 0.07               | 0.035(0.006)                  | EU                   | 0.06          | 0.039(0.017)       | 1.00 |
| rs12914466 | 15  | 81836638  | A  | G  | 0.62               | 0.017(0.003)                  | EU                   | 0.51          | 0.017(0.008)       | 1.00 |
| rs17349981 | 15  | 82231920  | A  | T  | 0.85               | 0.025(0.004)                  | EU                   | 0.95          | 0.021(0.018)       | 1.00 |
| rs2257011  | 15  | 84266145  | T  | G  | 0.5                | 0.044(0.003)                  | EU                   | 0.69          | 0.018(0.009)       | 1.00 |
| rs7162542  | 15  | 84514290  | G  | C  | 0.55               | 0.046(0.003)                  | EU                   | 0.73          | 0.029(0.01)        | 1.00 |
| rs2401171  | 15  | 84557676  | G  | T  | 0.74               | 0.049(0.005)                  | Asian                | 0.72          | 0.027(0.01)        | 1.00 |
| rs11855014 | 15  | 85728834  | G  | A  | 0.71               | 0.022(0.003)                  | EU                   | 0.77          | 0.014(0.01)        | 0.98 |
| rs1348002  | 15  | 89113138  | C  | G  | 0.32               | 0.017(0.003)                  | EU                   | 0.29          | -0.008(0.009)      | 1.00 |
| rs11633371 | 15  | 89356832  | T  | G  | 0.49               | 0.028(0.003)                  | EU                   | 0.58          | 0.034(0.009)       | 1.00 |
| rs16942341 | 15  | 89388905  | C  | T  | 0.97               | 0.138(0.01)                   | EU                   | 0.96          | 0.09(0.02)         | 1.00 |
| rs2280470  | 15  | 89395626  | A  | G  | 0.33               | 0.044(0.003)                  | EU                   | 0.47          | 0.023(0.009)       | 1.00 |
| rs2351491  | 15  | 89398105  | T  | C  | 0.25               | 0.062(0.011)                  | African              | 0.40          | 0.006(0.009)       | 1.00 |
| rs3817428  | 15  | 89415247  | C  | G  | 0.72;<br>0.89      | 0.039(0.003);<br>0.052(0.008) | EU;<br>Asian         | 0.86          | 0.026(0.012)       | 0.97 |
| rs2238300  | 15  | 89851580  | G  | A  | 0.6                | 0.021(0.003)                  | EU                   | 0.64          | 0(0.009)           | 1.00 |
| rs8028843  | 15  | 94028149  | T  | C  | 0.64               | 0.016(0.003)                  | EU                   | 0.39          | 0.008(0.009)       | 1.00 |
| rs7181724  | 15  | 94551607  | G  | A  | 0.45               | 0.02(0.003)                   | EU                   | 0.33          | 0.021(0.009)       | 1.00 |
| rs2871865  | 15  | 99194896  | C  | G  | 0.88;<br>0.92      | 0.062(0.005);<br>0.094(0.009) | EU;<br>Asian         | 0.82          | 0.046(0.011)       | 1.00 |
| rs2573625  | 15  | 100513158 | T  | C  | 0.67               | 0.029(0.003)                  | EU                   | 0.56          | 0.02(0.008)        | 1.00 |
| rs2573652  | 15  | 100514614 | C  | T  | 0.56               | 0.035(0.005)                  | Asian                | 0.61          | 0.022(0.009)       | 1.00 |
| rs4246302  | 15  | 100687967 | G  | A  | 0.32               | 0.027(0.003)                  | EU                   | 0.20          | 0.022(0.01)        | 1.00 |
| rs4548838  | 15  | 100761190 | T  | C  | 0.46               | 0.033(0.003)                  | EU                   | 0.47          | 0.006(0.008)       | 1.00 |



Supplementary table 4: Previously reported height SNPs composing GRS1. Position is given in genome build 37. A1 is the reported trait-increasing allele, A2 is the other allele. A1-freq, effects, and SEs, are given in the previously reported discovery study (dscvr) and in the HCHS/SOL. Ethnicity (dscvr) is that of the previously reported study population. Provided imputation info scores are in the HCHS/SOL.

| SNP        | Chr | position  | A1 | A2 | A1-freq<br>(dscvr) | Effect-SE<br>(dscvr)         | ethnicity<br>(dscvr) | A1-freq (SOL) | Effect-SE<br>(SOL) | Info |
|------------|-----|-----------|----|----|--------------------|------------------------------|----------------------|---------------|--------------------|------|
| rs7170986  | 15  | 101632867 | G  | A  | 0.76               | 0.019(0.003)                 | EU                   | 0.55          | 0.01(0.009)        | 1.00 |
| rs8042424  | 15  | 101762539 | C  | T  | 0.74               | 0.023(0.004)                 | EU                   | 0.75          | 0.007(0.01)        | 1.00 |
| rs11648796 | 16  | 792190    | G  | A  | 0.25               | 0.033(0.004)                 | EU                   | 0.48          | 0.003(0.01)        | 0.88 |
| rs12597498 | 16  | 990815    | T  | C  | 0.37               | 0.018(0.003)                 | EU                   | 0.50          | 0.004(0.008)       | 1.00 |
| rs26868    | 16  | 2249376   | A  | T  | 0.47               | 0.029(0.003)                 | EU                   | 0.43          | 0.017(0.009)       | 1.00 |
| rs2014467  | 16  | 2336394   | C  | T  | 0.34               | 0.019(0.003)                 | EU                   | 0.38          | 0(0.009)           | 1.00 |
| rs12926008 | 16  | 2488211   | C  | T  | 0.68               | 0.02(0.003)                  | EU                   | 0.80          | 0.006(0.01)        | 1.00 |
| rs1053996  | 16  | 3192651   | C  | T  | 0.4                | 0.02(0.003)                  | EU                   | 0.34          | 0.01(0.009)        | 1.00 |
| rs129963   | 16  | 3796147   | C  | T  | 0.58               | 0.02(0.003)                  | EU                   | 0.43          | 0.001(0.008)       | 1.00 |
| rs2531992  | 16  | 4021734   | G  | A  | 0.85               | 0.027(0.004)                 | EU                   | 0.84          | 0.02(0.011)        | 1.00 |
| rs960006   | 16  | 4911195   | C  | T  | 0.47               | 0.02(0.003)                  | EU                   | 0.62          | 0.02(0.009)        | 1.00 |
| rs1659127  | 16  | 14388305  | A  | G  | 0.34;<br>0.48      | 0.03(0.003);<br>0.032(0.006) | EU;<br>Asian         | 0.30          | 0.028(0.009)       | 1.00 |
| rs2023693  | 16  | 20880040  | G  | A  | 0.6                | 0.016(0.003)                 | EU                   | 0.41          | 0.011(0.009)       | 1.00 |
| rs11642612 | 16  | 30030195  | C  | A  | 0.4                | 0.016(0.003)                 | EU                   | 0.28          | 0.005(0.009)       | 1.00 |
| rs4785393  | 16  | 50259483  | G  | A  | 0.16               | 0.023(0.004)                 | EU                   | 0.22          | 0.001(0.01)        | 1.00 |
| rs9929889  | 16  | 51094038  | C  | T  | 0.59               | 0.017(0.003)                 | EU                   | 0.61          | -0.013(0.008)      | 0.98 |
| rs8058684  | 16  | 53515118  | A  | G  | 0.3                | 0.021(0.003)                 | EU                   | 0.26          | 0.005(0.01)        | 1.00 |
| rs1966913  | 16  | 67384226  | A  | T  | 0.96               | 0.044(0.007)                 | EU                   | 0.93          | 0.041(0.016)       | 1.00 |
| rs3790086  | 16  | 69887707  | C  | G  | 0.56               | 0.023(0.003)                 | EU                   | 0.45          | 0.012(0.009)       | 1.00 |
| rs217181   | 16  | 72114002  | T  | C  | 0.2                | 0.024(0.004)                 | EU                   | 0.31          | 0.005(0.009)       | 1.00 |
| rs11640018 | 16  | 75328308  | C  | T  | 0.37               | 0.019(0.003)                 | EU                   | 0.40          | 0.012(0.009)       | 1.00 |
| rs4243206  | 16  | 81589983  | A  | C  | 0.19               | 0.024(0.004)                 | EU                   | 0.23          | 0.013(0.01)        | 1.00 |
| rs6420435  | 16  | 82184201  | A  | C  | 0.21               | 0.023(0.004)                 | EU                   | 0.14          | 0.014(0.012)       | 0.99 |
| rs2326458  | 16  | 84987679  | C  | A  | 0.25               | 0.022(0.004)                 | EU                   | 0.42          | 0.014(0.009)       | 1.00 |
| rs4843367  | 16  | 86417890  | C  | T  | 0.66               | 0.019(0.003)                 | EU                   | 0.56          | 0.008(0.008)       | 1.00 |
| rs300039   | 16  | 86688976  | C  | T  | 0.78               | 0.02(0.004)                  | EU                   | 0.61          | -0.004(0.009)      | 1.00 |
| rs3748394  | 16  | 87360500  | G  | C  | 0.61               | 0.018(0.003)                 | EU                   | 0.52          | 0(0.008)           | 1.00 |
| rs8052560  | 16  | 88777242  | A  | C  | 0.79               | 0.036(0.004)                 | EU                   | 0.83          | -0.012(0.011)      | 0.92 |
| rs2377058  | 16  | 89734831  | G  | A  | 0.34               | 0.017(0.003)                 | EU                   | 0.26          | -0.004(0.01)       | 1.00 |
| rs11861084 | 16  | 89875710  | A  | C  | 0.41               | 0.009(0.003)                 | EU                   | 0.30          | -0.01(0.009)       | 1.00 |

Supplementary table 4: Previously reported height SNPs composing GRS1. Position is given in genome build 37. A1 is the reported trait-increasing allele, A2 is the other allele. A1-freq, effects, and SEs, are given in the previously reported discovery study (dscvr) and in the HCHS/SOL. Ethnicity (dscvr) is that of the previously reported study population. Provided imputation info scores are in the HCHS/SOL.

| SNP        | Chr | position | A1 | A2 | A1-freq<br>(dscvr) | Effect-SE<br>(dscvr) | ethnicity<br>(dscvr) | A1-freq (SOL) | Effect-SE<br>(SOL) | Info |
|------------|-----|----------|----|----|--------------------|----------------------|----------------------|---------------|--------------------|------|
| rs870183   | 17  | 599811   | G  | A  | 0.53               | 0.017(0.003)         | EU                   | 0.40          | 0.013(0.008)       | 1.00 |
| rs9217     | 17  | 7363088  | C  | T  | 0.37               | 0.028(0.003)         | EU                   | 0.35          | 0.016(0.009)       | 1.00 |
| rs8073177  | 17  | 7440584  | C  | T  | 0.78               | 0.019(0.004)         | EU                   | 0.79          | -0.003(0.01)       | 1.00 |
| rs1625895  | 17  | 7578115  | C  | T  | 0.88               | 0.03(0.005)          | EU                   | 0.87          | 0.005(0.013)       | 1.00 |
| rs8067165  | 17  | 8031936  | G  | C  | 0.6                | 0.023(0.003)         | EU                   | 0.42          | 0.008(0.009)       | 0.97 |
| rs8069300  | 17  | 11984232 | G  | C  | 0.47               | 0.016(0.003)         | EU                   | 0.52          | 0.001(0.008)       | 1.00 |
| rs4640244  | 17  | 21284223 | A  | G  | 0.61               | 0.025(0.003)         | EU                   | 0.71          | -0.004(0.009)      | 1.00 |
| rs3809790  | 17  | 27955540 | C  | T  | 0.53               | 0.016(0.003)         | EU                   | 0.53          | 0.02(0.008)        | 1.00 |
| rs9889755  | 17  | 29234505 | T  | C  | 0.11               | 0.003(0.005)         | EU                   | 0.15          | -0.012(0.011)      | 1.00 |
| rs3760318  | 17  | 29247715 | G  | A  | 0.63               | 0.041(0.003)         | EU                   | 0.64          | 0.037(0.008)       | 1.00 |
| rs2028067  | 17  | 30239698 | C  | T  | 0.17               | 0.031(0.004)         | EU                   | 0.28          | 0.009(0.009)       | 1.00 |
| rs2338115  | 17  | 36929578 | T  | C  | 0.54               | 0.023(0.003)         | EU                   | 0.40          | 0.013(0.009)       | 1.00 |
| rs584828   | 17  | 38599230 | C  | T  | 0.6                | 0.025(0.003)         | EU                   | 0.53          | 0.02(0.009)        | 1.00 |
| rs3169906  | 17  | 38632761 | C  | G  | 0.85               | 0.017(0.004)         | EU                   | 0.81          | -0.01(0.011)       | 1.00 |
| rs9766     | 17  | 40852841 | A  | G  | 0.54               | 0.021(0.003)         | EU                   | 0.38          | 0.022(0.008)       | 1.00 |
| rs4986172  | 17  | 43216281 | C  | T  | 0.65               | 0.034(0.003)         | EU                   | 0.55          | 0.005(0.008)       | 1.00 |
| rs199515   | 17  | 44856641 | C  | G  | 0.8                | 0.016(0.004)         | EU                   | 0.84          | 0.006(0.011)       | 1.00 |
| rs8073371  | 17  | 46096276 | C  | T  | 0.78               | 0.025(0.004)         | EU                   | 0.90          | 0.024(0.014)       | 0.99 |
| rs6504389  | 17  | 46643364 | C  | G  | 0.16               | 0.017(0.004)         | EU                   | 0.22          | 0.005(0.01)        | 1.00 |
| rs318095   | 17  | 46974734 | T  | C  | 0.46               | 0.024(0.003)         | EU                   | 0.60          | 0.027(0.008)       | 1.00 |
| rs2072153  | 17  | 47390014 | C  | G  | 0.31               | 0.026(0.003)         | EU                   | 0.35          | 0.023(0.009)       | 1.00 |
| rs4605213  | 17  | 49244747 | C  | G  | 0.34               | 0.018(0.003)         | EU                   | 0.40          | 0.001(0.009)       | 1.00 |
| rs11867943 | 17  | 54229842 | T  | A  | 0.12               | 0.027(0.005)         | EU                   | 0.19          | 0.016(0.011)       | 1.00 |
| rs227724   | 17  | 54778817 | T  | A  | 0.35               | 0.03(0.003)          | EU                   | 0.24          | 0.019(0.01)        | 1.00 |
| rs1401795  | 17  | 54839652 | A  | G  | 0.51               | 0.03(0.003)          | EU                   | 0.36          | 0.027(0.009)       | 0.97 |
| rs2079795  | 17  | 59496649 | T  | C  | 0.33               | 0.044(0.003)         | EU                   | 0.42          | 0.038(0.008)       | 1.00 |
| rs757608   | 17  | 59497277 | A  | G  | 0.29               | 0.044(0.005)         | Asian                | 0.36          | 0.035(0.009)       | 1.00 |
| rs2378870  | 17  | 59638623 | T  | C  | 0.37               | 0.02(0.003)          | EU                   | 0.40          | 0.006(0.009)       | 1.00 |
| rs9903897  | 17  | 61716705 | A  | T  | 0.7                | 0.047(0.01)          | African              | 0.29          | 0.032(0.01)        | 1.00 |
| rs11658329 | 17  | 61763031 | C  | G  | 0.7                | 0.049(0.01)          | African              | 0.29          | 0.031(0.01)        | 1.00 |
| rs3785574  | 17  | 61763185 | T  | C  | 0.46               | 0.036(0.005)         | Asian                | 0.69          | 0.032(0.009)       | 0.97 |

Supplementary table 4: Previously reported height SNPs composing GRS1. Position is given in genome build 37. A1 is the reported trait-increasing allele, A2 is the other allele. A1-freq, effects, and SEs, are given in the previously reported discovery study (dscvr) and in the HCHS/SOL. Ethnicity (dscvr) is that of the previously reported study population. Provided imputation info scores are in the HCHS/SOL.

| SNP        | Chr | position | A1 | A2 | A1-freq<br>(dscvr) | Effect-SE<br>(dscvr)          | ethnicity<br>(dscvr) | A1-freq (SOL) | Effect-SE<br>(SOL) | Info |
|------------|-----|----------|----|----|--------------------|-------------------------------|----------------------|---------------|--------------------|------|
| rs15637    | 17  | 61772050 | G  | C  | 0.7                | 0.046(0.01)                   | African              | 0.29          | 0.032(0.01)        | 1.00 |
| rs2044124  | 17  | 61845425 | T  | C  | 0.06               | 0.045(0.007)                  | EU                   | 0.02          | -0.002(0.029)      | 1.00 |
| rs2854207  | 17  | 61947107 | G  | C  | 0.27               | 0.046(0.003)                  | EU                   | 0.23          | 0.022(0.01)        | 0.99 |
| rs2854160  | 17  | 61977248 | C  | T  | 0.46               | 0.035(0.005)                  | Asian                | 0.64          | 0.028(0.009)       | 0.99 |
| rs2070776  | 17  | 62007498 | G  | A  | 0.65               | 0.042(0.003)                  | EU                   | 0.56          | 0.012(0.009)       | 1.00 |
| rs3923086  | 17  | 63549488 | C  | A  | 0.6                | 0.024(0.003)                  | EU                   | 0.46          | 0(0.009)           | 1.00 |
| rs2072268  | 17  | 66303352 | G  | A  | 0.52               | 0.02(0.003)                   | EU                   | 0.32          | 0.003(0.009)       | 1.00 |
| rs11867479 | 17  | 68090207 | T  | C  | 0.35               | 0.026(0.003)                  | EU                   | 0.32          | 0.001(0.009)       | 1.00 |
| rs10083886 | 17  | 69923355 | T  | C  | 0.26               | 0.019(0.003)                  | EU                   | 0.22          | 0.018(0.01)        | 1.00 |
| rs2117563  | 17  | 73368985 | G  | A  | 0.83               | 0.024(0.004)                  | EU                   | 0.71          | 0.013(0.01)        | 1.00 |
| rs1552173  | 17  | 76718842 | C  | T  | 0.46               | 0.018(0.003)                  | EU                   | 0.54          | 0.002(0.008)       | 0.99 |
| rs1478610  | 17  | 79422252 | A  | G  | 0.37               | 0.025(0.004)                  | EU                   | 0.36          | 0.008(0.009)       | 0.98 |
| rs4239020  | 17  | 80176641 | C  | T  | 0.33               | 0.021(0.003)                  | EU                   | 0.19          | 0.005(0.011)       | 1.00 |
| rs888403   | 18  | 2766938  | G  | A  | 0.36               | 0.019(0.003)                  | EU                   | 0.23          | 0.007(0.01)        | 1.00 |
| rs692964   | 18  | 13094132 | G  | A  | 0.4                | 0.019(0.003)                  | EU                   | 0.31          | 0.006(0.009)       | 1.00 |
| rs14062    | 18  | 19450303 | G  | A  | 0.67               | 0.018(0.003)                  | EU                   | 0.57          | -0.001(0.009)      | 1.00 |
| rs8098316  | 18  | 20672555 | G  | T  | 0.82               | 0.055(0.006)                  | Asian                | 0.68          | 0.013(0.009)       | 1.00 |
| rs4369779  | 18  | 20735408 | C  | T  | 0.79;<br>0.83      | 0.056(0.004);<br>0.061(0.006) | EU;<br>Asian         | 0.66          | 0.026(0.009)       | 1.00 |
| rs11661645 | 18  | 45888770 | A  | G  | 0.31               | 0.02(0.003)                   | EU                   | 0.42          | 0.003(0.009)       | 1.00 |
| rs12454567 | 18  | 46270114 | A  | G  | 0.89               | 0.026(0.005)                  | EU                   | 0.88          | -0.001(0.013)      | 0.99 |
| rs2337143  | 18  | 46482070 | A  | G  | 0.35               | 0.018(0.003)                  | EU                   | 0.39          | -0.003(0.009)      | 1.00 |
| rs16950303 | 18  | 46582359 | A  | G  | 0.73               | 0.041(0.005)                  | Asian                | 0.87          | 0.028(0.013)       | 1.00 |
| rs357897   | 18  | 46584184 | T  | C  | 0.36               | 0.044(0.01)                   | African              | 0.73          | 0.023(0.01)        | 1.00 |
| rs1787200  | 18  | 46587654 | A  | G  | 0.37               | 0.044(0.01)                   | African              | 0.77          | 0.027(0.01)        | 1.00 |
| rs12458127 | 18  | 46657358 | C  | T  | 0.93               | 0.057(0.006)                  | EU                   | 0.88          | 0.029(0.013)       | 1.00 |
| rs9967417  | 18  | 46959500 | G  | C  | 0.43               | 0.04(0.003)                   | EU                   | 0.26          | 0.012(0.01)        | 1.00 |
| rs17782313 | 18  | 57851097 | C  | T  | 0.21               | 0.031(0.006)                  | Asian                | 0.16          | 0.016(0.011)       | 1.00 |
| rs11152213 | 18  | 57852948 | C  | A  | 0.25               | 0.025(0.004)                  | EU                   | 0.16          | 0.015(0.011)       | 1.00 |
| rs8097893  | 18  | 74983055 | A  | G  | 0.95               | 0.042(0.007)                  | EU                   | 0.90          | 0.027(0.014)       | 1.00 |
| rs11659752 | 18  | 77222862 | T  | G  | 0.7                | 0.024(0.003)                  | EU                   | 0.71          | 0.01(0.009)        | 1.00 |

Supplementary table 4: Previously reported height SNPs composing GRS1. Position is given in genome build 37. A1 is the reported trait-increasing allele, A2 is the other allele. A1-freq, effects, and SEs, are given in the previously reported discovery study (dscvr) and in the HCHS/SOL. Ethnicity (dscvr) is that of the previously reported study population. Provided imputation info scores are in the HCHS/SOL.

| SNP        | Chr | position | A1 | A2 | A1-freq<br>(dscvr) | Effect-SE<br>(dscvr) | ethnicity<br>(dscvr) | A1-freq (SOL) | Effect-SE<br>(SOL) | Info |
|------------|-----|----------|----|----|--------------------|----------------------|----------------------|---------------|--------------------|------|
| rs11880992 | 19  | 2176403  | A  | G  | 0.4                | 0.033(0.003)         | EU                   | 0.36          | 0.023(0.009)       | 1.00 |
| rs2074977  | 19  | 3434028  | C  | A  | 0.36               | 0.029(0.003)         | EU                   | 0.56          | 0.002(0.009)       | 1.00 |
| rs2123731  | 19  | 4929473  | A  | G  | 0.73               | 0.023(0.004)         | EU                   | 0.61          | 0.007(0.008)       | 1.00 |
| rs891088   | 19  | 7184762  | G  | A  | 0.26               | 0.029(0.003)         | EU                   | 0.31          | 0.014(0.009)       | 1.00 |
| rs1346490  | 19  | 7244233  | A  | C  | 0.61               | 0.018(0.003)         | EU                   | 0.56          | 0.002(0.008)       | 1.00 |
| rs4072910  | 19  | 8644031  | G  | C  | 0.56               | 0.032(0.004)         | EU                   | 0.40          | 0.017(0.009)       | 1.00 |
| rs6511689  | 19  | 10321089 | T  | C  | 0.69               | 0.018(0.003)         | EU                   | 0.75          | 0.009(0.01)        | 1.00 |
| rs8102380  | 19  | 10801185 | G  | A  | 0.31               | 0.02(0.003)          | EU                   | 0.21          | 0.011(0.01)        | 1.00 |
| rs7259684  | 19  | 12186611 | G  | A  | 0.07               | 0.035(0.006)         | EU                   | 0.10          | 0.013(0.014)       | 1.00 |
| rs8103068  | 19  | 17522869 | T  | C  | 0.86               | 0.031(0.005)         | EU                   | 0.80          | 0.007(0.01)        | 0.99 |
| rs10401193 | 19  | 19591066 | A  | G  | 0.82               | 0.028(0.004)         | EU                   | 0.73          | 0.006(0.009)       | 1.00 |
| rs8103992  | 19  | 19665643 | A  | C  | 0.2                | 0.029(0.004)         | EU                   | 0.17          | 0.02(0.011)        | 0.99 |
| rs7253628  | 19  | 31047269 | G  | A  | 0.16               | 0.024(0.004)         | EU                   | 0.15          | -0.004(0.012)      | 1.00 |
| rs4802134  | 19  | 38346685 | A  | G  | 0.21               | 0.026(0.004)         | EU                   | 0.13          | 0.018(0.012)       | 1.00 |
| rs4803468  | 19  | 41922352 | A  | G  | 0.42               | 0.03(0.003)          | EU                   | 0.44          | 0.023(0.009)       | 1.00 |
| rs11880124 | 19  | 42683791 | A  | G  | 0.91               | 0.041(0.005)         | EU                   | 0.86          | 0.021(0.012)       | 0.99 |
| rs2682587  | 19  | 44082429 | A  | C  | 0.2                | 0.023(0.004)         | EU                   | 0.12          | 0.021(0.013)       | 1.00 |
| rs2059877  | 19  | 48188809 | T  | G  | 0.26               | 0.019(0.003)         | EU                   | 0.27          | -0.002(0.009)      | 1.00 |
| rs7273787  | 20  | 4098567  | G  | A  | 0.35               | 0.022(0.003)         | EU                   | 0.25          | 0.022(0.01)        | 1.00 |
| rs17721822 | 20  | 6469596  | G  | A  | 0.63               | 0.035(0.003)         | EU                   | 0.57          | -0.002(0.009)      | 1.00 |
| rs1884897  | 20  | 6612832  | A  | G  | 0.36               | 0.044(0.003)         | EU                   | 0.29          | 0.027(0.009)       | 1.00 |
| rs2145272  | 20  | 6626218  | G  | A  | 0.12               | 0.062(0.008)         | Asian                | 0.27          | 0.029(0.01)        | 1.00 |
| rs6085662  | 20  | 6698372  | C  | G  | 0.35               | 0.02(0.003)          | EU                   | 0.36          | 0.009(0.009)       | 0.99 |
| rs6080830  | 20  | 17771113 | A  | G  | 0.56               | 0.016(0.003)         | EU                   | 0.63          | 0.018(0.009)       | 1.00 |
| rs7261425  | 20  | 20068635 | C  | G  | 0.71               | 0.021(0.003)         | EU                   | 0.74          | 0.033(0.009)       | 1.00 |
| rs8117259  | 20  | 20348253 | C  | T  | 0.82               | 0.023(0.004)         | EU                   | 0.77          | 0.02(0.01)         | 1.00 |
| rs6137287  | 20  | 21180259 | T  | C  | 0.31               | 0.02(0.003)          | EU                   | 0.23          | 0.004(0.01)        | 1.00 |
| rs1074683  | 20  | 32304653 | C  | G  | 0.76               | 0.044(0.003)         | EU                   | 0.68          | 0.014(0.009)       | 1.00 |
| rs1535466  | 20  | 33718706 | G  | A  | 0.27               | 0.027(0.003)         | EU                   | 0.14          | 0.012(0.012)       | 0.99 |
| rs6060369  | 20  | 33907161 | C  | T  | 0.3                | 0.06(0.005)          | Asian                | 0.37          | 0.034(0.009)       | 1.00 |
| rs224329   | 20  | 34019579 | T  | C  | 0.3                | 0.062(0.005)         | Asian                | 0.35          | 0.033(0.009)       | 1.00 |

Supplementary table 4: Previously reported height SNPs composing GRS1. Position is given in genome build 37. A1 is the reported trait-increasing allele, A2 is the other allele. A1-freq, effects, and SEs, are given in the previously reported discovery study (dscvr) and in the HCHS/SOL. Ethnicity (dscvr) is that of the previously reported study population. Provided imputation info scores are in the HCHS/SOL.

| SNP        | Chr | position | A1 | A2 | A1-freq<br>(dscvr) | Effect-SE<br>(dscvr) | ethnicity<br>(dscvr) | A1-freq (SOL) | Effect-SE<br>(SOL) | Info |
|------------|-----|----------|----|----|--------------------|----------------------|----------------------|---------------|--------------------|------|
| rs143384   | 20  | 34025756 | G  | A  | 0.42               | 0.075(0.003)         | EU                   | 0.42          | 0.037(0.009)       | 1.00 |
| rs2236164  | 20  | 34097353 | C  | T  | 0.3                | 0.053(0.005)         | Asian                | 0.31          | 0.021(0.009)       | 1.00 |
| rs2425163  | 20  | 34432670 | G  | A  | 0.18               | 0.058(0.004)         | EU                   | 0.21          | 0.029(0.01)        | 1.00 |
| rs4812586  | 20  | 35544673 | A  | G  | 0.84               | 0.03(0.004)          | EU                   | 0.67          | 0.038(0.009)       | 1.00 |
| rs2224538  | 20  | 38552078 | T  | C  | 0.65               | 0.017(0.003)         | EU                   | 0.63          | 0.012(0.009)       | 1.00 |
| rs17450430 | 20  | 47772264 | T  | A  | 0.24               | 0.035(0.003)         | EU                   | 0.17          | 0.04(0.011)        | 1.00 |
| rs6020202  | 20  | 48634821 | G  | A  | 0.78               | 0.022(0.004)         | EU                   | 0.59          | 0.004(0.009)       | 1.00 |
| rs1326023  | 20  | 54842378 | A  | G  | 0.3                | 0.024(0.003)         | EU                   | 0.27          | 0.011(0.01)        | 1.00 |
| rs2057291  | 20  | 57472043 | A  | G  | 0.34               | 0.02(0.003)          | EU                   | 0.28          | 0.024(0.009)       | 1.00 |
| rs3026499  | 20  | 57948773 | G  | A  | 0.67               | 0.026(0.005)         | EU                   | 0.67          | -0.008(0.009)      | 1.00 |
| rs6061231  | 20  | 60956917 | C  | A  | 0.72               | 0.021(0.003)         | EU                   | 0.72          | 0.015(0.009)       | 1.00 |
| rs2829941  | 21  | 27208935 | T  | G  | 0.61               | 0.017(0.003)         | EU                   | 0.69          | 0.003(0.009)       | 1.00 |
| rs2834442  | 21  | 35690786 | A  | T  | 0.64               | 0.024(0.003)         | EU                   | 0.73          | 0.018(0.009)       | 1.00 |
| rs2211866  | 21  | 39688107 | A  | G  | 0.41               | 0.022(0.003)         | EU                   | 0.47          | 0.016(0.008)       | 0.98 |
| rs9977276  | 21  | 47436327 | G  | T  | 0.78               | 0.022(0.004)         | EU                   | 0.85          | 0.034(0.012)       | 1.00 |
| rs2413143  | 22  | 33056859 | C  | T  | 0.84               | 0.034(0.004)         | EU                   |               |                    |      |
| rs7284476  | 22  | 38129332 | A  | G  | 0.43               | 0.018(0.003)         | EU                   | 0.32          | 0.014(0.009)       | 1.00 |
| rs5757318  | 22  | 39275656 | T  | A  | 0.15               | 0.029(0.005)         | EU                   | 0.08          | 0.018(0.015)       | 0.99 |
| rs738288   | 22  | 39907661 | G  | A  | 0.47               | 0.02(0.003)          | EU                   | 0.39          | 0.01(0.009)        | 0.98 |
| rs11090631 | 22  | 45846371 | T  | C  | 0.2                | 0.02(0.004)          | EU                   | 0.18          | 0(0.011)           | 1.00 |
| rs12393627 | 23  | 2885723  | G  | A  | 0.37               | 0.093(0.019)         | African              | 0.06          | 0.024(0.017)       | 0.75 |

Supplementary table 5: SNPs composing GRS2. Position is given in genome build 37. A1 is the trait-increasing allele, A2 is the other allele. A1-freq, effects, SEs, and imputation info scores are in the HCHS/SOL.

| SNP         | Chr | position | A1 | A2 | A1-freq (SOL) | Effect-SE (SOL) | Info |
|-------------|-----|----------|----|----|---------------|-----------------|------|
| rs61775410  | 1   | 2038062  | A  | G  | 0.32          | 0.294(0.088)    | 0.86 |
| rs569290878 | 1   | 9356665  | A  | G  | 0.25          | 0.352(0.102)    | 0.74 |
| rs12143751  | 1   | 11164672 | T  | C  | 0.98          | 0.927(0.285)    | 1.00 |

Supplementary table 5: SNPs composing GRS2. Position is given in genome build 37. A1 is the trait-increasing allele, A2 is the other allele. A1-freq, effects, SEs, and imputation info scores are in the HCHS/SOL.

| SNP         | Chr | position  | A1  | A2         | A1-freq (SOL) | Effect-SE (SOL) | Info |
|-------------|-----|-----------|-----|------------|---------------|-----------------|------|
| rs3170740   | 1   | 17312743  | T   | C          | 0.56          | 0.344(0.08)     | 0.98 |
| rs12691495  | 1   | 19997180  | A   | C          | 0.18          | 0.333(0.101)    | 1.00 |
|             | 1   | 21533770  | A   | ATTTT      | 0.65          | 0.33(0.083)     | 0.97 |
| rs113151642 | 1   | 22307223  | C   | A          | 0.04          | 0.615(0.198)    | 0.98 |
| rs187524329 | 1   | 23490363  | C   | T          | 0.02          | 0.851(0.294)    | 0.96 |
| rs6702180   | 1   | 24882805  | A   | G          | 0.14          | 0.363(0.112)    | 0.99 |
| rs11247959  | 1   | 25897794  | G   | A          | 0.98          | 0.828(0.312)    | 0.96 |
| rs12062488  | 1   | 26466253  | A   | G          | 0.84          | 0.336(0.109)    | 0.99 |
| rs374278432 | 1   | 26731804  | CA  | C          | 0.49          | 0.22(0.08)      | 0.96 |
| rs76011508  | 1   | 27371370  | T   | C          | 0.98          | 0.956(0.283)    | 1.00 |
| rs192448023 | 1   | 32524620  | T   | C          | 0.01          | 0.993(0.35)     | 0.90 |
| rs377227580 | 1   | 38126133  | A   | ATCTG      | 0.42          | 0.239(0.079)    | 1.00 |
| rs16827116  | 1   | 40764828  | C   | G          | 0.02          | 0.896(0.301)    | 0.81 |
| rs35358440  | 1   | 41744673  | AT  | A          | 0.53          | 0.249(0.082)    | 0.98 |
| rs56071727  | 1   | 46090844  | T   | G          | 0.84          | 0.305(0.109)    | 0.99 |
| rs545490962 | 1   | 47734760  | CA  | C          | 0.26          | 0.367(0.104)    | 0.70 |
| rs140909239 | 1   | 51421279  | A   | C          | 0.09          | 0.487(0.155)    | 0.84 |
| rs149554311 | 1   | 53992239  | CCA | C          | 0.15          | 0.303(0.117)    | 0.98 |
| rs550844578 | 1   | 54957689  | A   | ATTT       | 0.47          | 0.359(0.086)    | 0.91 |
| rs2454321   | 1   | 67280355  | C   | G          | 0.83          | 0.434(0.107)    | 0.92 |
| rs148376028 | 1   | 78291437  | CT  | C          | 0.98          | 1.113(0.26)     | 0.95 |
| rs4612587   | 1   | 78846539  | A   | C          | 0.75          | 0.284(0.088)    | 1.00 |
| rs12734233  | 1   | 86008536  | A   | G          | 0.83          | 0.218(0.107)    | 0.92 |
| rs11578202  | 1   | 86392577  | A   | G          | 0.02          | 0.764(0.25)     | 0.96 |
| rs192634734 | 1   | 89010041  | A   | C          | 0.08          | 0.488(0.161)    | 0.86 |
| rs78380111  | 1   | 93311922  | T   | C          | 0.99          | 1.161(0.33)     | 0.99 |
| rs143374573 | 1   | 95747514  | T   | G          | 0.99          | 1.109(0.361)    | 0.86 |
| rs143424888 | 1   | 103456996 | C   | CACGTGATCT | 0.50          | 0.325(0.081)    | 0.98 |
| rs145128218 | 1   | 113372815 | T   | G          | 0.96          | 0.643(0.209)    | 0.98 |
| rs74798287  | 1   | 118517643 | G   | A          | 0.99          | 0.829(0.364)    | 1.00 |
| rs12738523  | 1   | 118855812 | A   | T          | 0.30          | 0.31(0.084)     | 1.00 |
| rs111962736 | 1   | 119281761 | A   | G          | 0.03          | 0.848(0.258)    | 0.90 |
| rs113138594 | 1   | 120265521 | C   | CA         | 0.71          | 0.272(0.091)    | 0.85 |
| rs138439903 | 1   | 146750583 | C   | T          | 0.02          | 1.252(0.361)    | 0.68 |
| rs6587723   | 1   | 149922960 | T   | C          | 0.50          | 0.289(0.078)    | 0.96 |

Supplementary table 5: SNPs composing GRS2. Position is given in genome build 37. A1 is the trait-increasing allele, A2 is the other allele. A1-freq, effects, SEs, and imputation info scores are in the HCHS/SOL.

| SNP         | Chr | position  | A1 | A2 | A1-freq (SOL) | Effect-SE (SOL) | Info |
|-------------|-----|-----------|----|----|---------------|-----------------|------|
| rs34802819  | 1   | 149946480 | CT | C  | 0.33          | 0.322(0.095)    | 0.83 |
| rs2185838   | 1   | 151505708 | C  | T  | 0.44          | 0.177(0.082)    | 1.00 |
| rs78083675  | 1   | 160382619 | A  | G  | 0.99          | 1.103(0.365)    | 0.84 |
| rs79386777  | 1   | 170517853 | T  | C  | 0.17          | 0.308(0.114)    | 1.00 |
| rs72721175  | 1   | 172227532 | G  | A  | 0.91          | 0.545(0.14)     | 0.96 |
| rs71644479  | 1   | 176654220 | C  | CT | 0.93          | 0.472(0.156)    | 0.84 |
| rs74951797  | 1   | 183185168 | C  | A  | 0.02          | 0.918(0.269)    | 0.92 |
| rs4652825   | 1   | 183793323 | A  | G  | 0.31          | 0.225(0.083)    | 1.00 |
| rs78695956  | 1   | 203551449 | C  | T  | 0.03          | 0.7(0.233)      | 0.97 |
| rs74667124  | 1   | 212376761 | G  | A  | 0.01          | 1.155(0.342)    | 0.95 |
| rs4655353   | 1   | 214645533 | A  | T  | 0.45          | 0.257(0.077)    | 1.00 |
| rs188240045 | 1   | 214992120 | C  | T  | 0.03          | 1.024(0.302)    | 0.63 |
| rs1764705   | 1   | 218648556 | C  | T  | 0.30          | 0.307(0.089)    | 0.99 |
| rs200863892 | 1   | 218804102 | A  | AT | 0.02          | 0.928(0.329)    | 0.71 |
| rs1766407   | 1   | 219942284 | T  | C  | 0.27          | 0.335(0.087)    | 1.00 |
| rs77238592  | 1   | 221093128 | C  | T  | 0.01          | 1.084(0.37)     | 0.98 |
| rs116028664 | 1   | 224509828 | A  | G  | 0.98          | 0.775(0.272)    | 0.99 |
| rs34452846  | 1   | 227505361 | G  | GA | 0.07          | 0.452(0.151)    | 1.00 |
| rs72759884  | 1   | 243618209 | C  | T  | 0.07          | 0.582(0.151)    | 0.99 |
| rs113783575 | 2   | 1614042   | G  | A  | 0.85          | 0.429(0.114)    | 0.89 |
| rs34398693  | 2   | 10402673  | T  | C  | 0.72          | 0.293(0.088)    | 0.99 |
| rs538829651 | 2   | 18502128  | C  | T  | 0.02          | 0.801(0.264)    | 0.92 |
| rs9306887   | 2   | 20069242  | C  | T  | 0.44          | 0.263(0.078)    | 0.96 |
| rs7572352   | 2   | 24235049  | A  | C  | 0.06          | 0.677(0.174)    | 0.88 |
| rs10206196  | 2   | 25137323  | T  | C  | 0.41          | 0.417(0.084)    | 1.00 |
| rs6545884   | 2   | 25243469  | A  | T  | 0.45          | 0.358(0.083)    | 1.00 |
| rs71441090  | 2   | 27927968  | G  | A  | 0.06          | 0.45(0.159)     | 1.00 |
| rs79674009  | 2   | 33153484  | A  | G  | 0.09          | 0.547(0.139)    | 1.00 |
| rs115805714 | 2   | 33156052  | A  | C  | 0.09          | 0.538(0.139)    | 0.99 |
| rs116154825 | 2   | 33685899  | A  | G  | 0.01          | 0.841(0.325)    | 0.99 |
| rs10707574  | 2   | 36777377  | AT | A  | 0.58          | 0.208(0.085)    | 0.89 |
| rs6708822   | 2   | 37572907  | G  | A  | 0.97          | 0.768(0.234)    | 0.88 |
| rs12617882  | 2   | 38053004  | C  | T  | 0.32          | 0.301(0.085)    | 1.00 |
| rs2719139   | 2   | 42306198  | G  | C  | 0.98          | 0.807(0.332)    | 0.80 |
| rs72873667  | 2   | 43424210  | C  | T  | 0.01          | 1.362(0.344)    | 0.99 |

Supplementary table 5: SNPs composing GRS2. Position is given in genome build 37. A1 is the trait-increasing allele, A2 is the other allele. A1-freq, effects, SEs, and imputation info scores are in the HCHS/SOL.

| SNP         | Chr | position  | A1 | A2            | A1-freq (SOL) | Effect-SE (SOL) | Info |
|-------------|-----|-----------|----|---------------|---------------|-----------------|------|
| rs11902778  | 2   | 44664992  | A  | C             | 0.01          | 1.288(0.369)    | 1.00 |
| rs146576352 | 2   | 46704538  | A  | C             | 0.99          | 1.106(0.321)    | 0.96 |
| rs72906425  | 2   | 54902994  | G  | A             | 0.01          | 1.309(0.337)    | 0.98 |
| rs531485959 | 2   | 55489667  | CT | C             | 0.79          | 0.4(0.121)      | 0.60 |
| rs77626563  | 2   | 56090844  | A  | G             | 0.04          | 0.897(0.206)    | 1.00 |
|             | 2   | 68294557  | AC | A             | 0.99          | 1.024(0.355)    | 0.96 |
| rs10668921  | 2   | 69529776  | C  | CAA           | 0.42          | 0.296(0.081)    | 0.99 |
| rs537942317 | 2   | 71638604  | A  | AT            | 0.70          | 0.351(0.089)    | 0.98 |
| rs12466955  | 2   | 88829687  | G  | A             | 0.03          | 0.489(0.224)    | 0.89 |
| rs201857370 | 2   | 98159849  | C  | T             | 0.86          | 0.376(0.14)     | 0.62 |
| rs9646948   | 2   | 108915608 | T  | C             | 0.67          | 0.266(0.083)    | 1.00 |
| rs72955353  | 2   | 121666711 | A  | T             | 0.01          | 1.335(0.324)    | 0.98 |
| rs144582482 | 2   | 134426574 | C  | T             | 0.98          | 0.82(0.37)      | 0.70 |
| rs6735329   | 2   | 136273578 | T  | C             | 0.74          | 0.216(0.087)    | 0.99 |
| rs4662381   | 2   | 145319098 | A  | G             | 0.99          | 0.793(0.522)    | 0.68 |
| rs7563233   | 2   | 169842746 | T  | C             | 0.07          | 0.458(0.158)    | 1.00 |
| rs13428567  | 2   | 172382519 | G  | A             | 0.27          | 0.235(0.088)    | 1.00 |
| rs142822571 | 2   | 174771842 | T  | A             | 0.01          | 1.603(0.55)     | 0.62 |
| rs6712695   | 2   | 178447723 | A  | G             | 0.98          | 0.761(0.261)    | 1.00 |
| rs55987533  | 2   | 183174038 | T  | C             | 0.03          | 0.92(0.232)     | 0.99 |
| rs61016895  | 2   | 192006342 | C  | T             | 0.46          | 0.276(0.088)    | 0.73 |
| rs6738541   | 2   | 203353447 | T  | C             | 0.32          | 0.271(0.083)    | 1.00 |
| rs56129324  | 2   | 216175077 | CA | C             | 0.41          | 0.227(0.087)    | 0.79 |
| rs4672814   | 2   | 217834419 | G  | A             | 0.69          | 0.317(0.083)    | 0.99 |
| rs139849317 | 2   | 217978117 | C  | CAT           | 0.98          | 1.057(0.285)    | 0.97 |
| rs397987830 | 2   | 218504573 | T  | TA            | 0.03          | 0.463(0.24)     | 0.96 |
| rs929937    | 2   | 218709215 | T  | C             | 0.39          | 0.265(0.082)    | 0.98 |
| rs144108931 | 2   | 219258197 | A  | ATT           | 0.25          | 0.377(0.1)      | 0.82 |
| rs73993327  | 2   | 219732897 | C  | T             | 0.01          | 1.033(0.317)    | 0.99 |
| rs549755504 | 2   | 219786236 | C  | T             | 0.02          | 0.906(0.308)    | 0.93 |
| rs144946248 | 2   | 224130150 | T  | C             | 0.97          | 1.045(0.257)    | 0.82 |
| rs7577127   | 2   | 224952821 | A  | G             | 0.07          | 0.489(0.159)    | 0.99 |
| rs6723976   | 2   | 232334678 | C  | G             | 0.38          | 0.251(0.079)    | 1.00 |
| rs10933385  | 2   | 232916068 | G  | A             | 0.13          | 0.424(0.121)    | 1.00 |
| rs544203612 | 2   | 233197798 | G  | GCCTCCTCCTCTT | 0.02          | 1.061(0.286)    | 0.83 |



Supplementary table 5: SNPs composing GRS2. Position is given in genome build 37. A1 is the trait-increasing allele, A2 is the other allele. A1-freq, effects, SEs, and imputation info scores are in the HCHS/SOL.

| SNP         | Chr | position  | A1      | A2   | A1-freq (SOL) | Effect-SE (SOL) | Info |
|-------------|-----|-----------|---------|------|---------------|-----------------|------|
| rs6738308   | 2   | 233550893 | T       | C    | 0.99          | 1.079(0.367)    | 0.85 |
| rs112813828 | 2   | 241752341 | A       | C    | 0.41          | 0.299(0.096)    | 0.62 |
| rs4503983   | 2   | 242411069 | T       | C    | 0.53          | 0.29(0.079)     | 1.00 |
| rs57917131  | 3   | 4669222   | A       | G    | 0.90          | 0.592(0.125)    | 1.00 |
| rs11918599  | 3   | 11775596  | A       | G    | 0.03          | 0.809(0.229)    | 0.98 |
| rs71306019  | 3   | 12820483  | A       | G    | 0.97          | 0.848(0.268)    | 0.80 |
| rs2675228   | 3   | 13553380  | C       | T    | 0.90          | 0.441(0.128)    | 0.99 |
| rs61581857  | 3   | 38074260  | G       | A    | 0.96          | 0.799(0.196)    | 1.00 |
| rs76584487  | 3   | 41102198  | A       | G    | 0.98          | 1.055(0.335)    | 0.83 |
| rs398051942 | 3   | 51151541  | TA      | T    | 0.91          | 0.412(0.137)    | 0.95 |
| rs200209164 | 3   | 51364014  | TTTGTTG | T    | 0.81          | 0.349(0.103)    | 0.88 |
| rs3806692   | 3   | 53080987  | G       | C    | 0.86          | 0.413(0.108)    | 1.00 |
| rs59658994  | 3   | 53174745  | C       | CTA  | 0.94          | 0.663(0.17)     | 0.87 |
| rs6783998   | 3   | 55606476  | T       | C    | 0.24          | 0.297(0.093)    | 0.99 |
| rs10618279  | 3   | 56892271  | C       | CAAA | 0.20          | 0.317(0.101)    | 0.88 |
| rs1522390   | 3   | 57957762  | G       | A    | 0.06          | 0.534(0.178)    | 0.94 |
| rs13065105  | 3   | 61567888  | T       | C    | 0.88          | 0.342(0.125)    | 0.91 |
| rs12491074  | 3   | 67257637  | G       | C    | 0.88          | 0.474(0.124)    | 0.99 |
| rs116053124 | 3   | 68827723  | T       | C    | 0.03          | 0.67(0.249)     | 1.00 |
| rs753319    | 3   | 72447890  | G       | C    | 0.51          | 0.311(0.078)    | 1.00 |
| rs114884447 | 3   | 98735411  | T       | C    | 0.01          | 1.104(0.375)    | 1.00 |
| rs2700629   | 3   | 99161919  | T       | C    | 0.96          | 0.784(0.189)    | 0.99 |
| rs5851884   | 3   | 112851172 | A       | AGT  | 0.64          | 0.323(0.081)    | 1.00 |
| rs12496735  | 3   | 114064002 | G       | T    | 0.96          | 0.704(0.207)    | 0.98 |
| rs9817665   | 3   | 114611829 | G       | A    | 0.54          | 0.229(0.081)    | 1.00 |
| rs12633752  | 3   | 128887527 | A       | G    | 0.91          | 0.579(0.137)    | 1.00 |
| rs75907243  | 3   | 134387993 | C       | G    | 0.99          | 1.048(0.378)    | 0.94 |
| rs17200503  | 3   | 136102316 | T       | C    | 0.91          | 0.426(0.135)    | 1.00 |
| rs34466132  | 3   | 141117969 | CT      | C    | 0.59          | 0.444(0.081)    | 0.94 |
| rs1965398   | 3   | 142728167 | T       | C    | 0.95          | 0.643(0.183)    | 0.96 |
| rs78569422  | 3   | 156700698 | A       | G    | 0.98          | 0.603(0.28)     | 0.93 |
| rs140122323 | 3   | 157565689 | TG      | T    | 0.15          | 0.412(0.12)     | 1.00 |
| rs490683    | 3   | 172175074 | C       | G    | 0.68          | 0.281(0.084)    | 1.00 |
| rs11709572  | 3   | 183311868 | T       | G    | 0.26          | 0.294(0.092)    | 0.89 |
| rs9864902   | 3   | 185351929 | G       | T    | 0.62          | 0.307(0.084)    | 0.87 |

Supplementary table 5: SNPs composing GRS2. Position is given in genome build 37. A1 is the trait-increasing allele, A2 is the other allele. A1-freq, effects, SEs, and imputation info scores are in the HCHS/SOL.

| SNP         | Chr | position  | A1     | A2 | A1-freq (SOL) | Effect-SE (SOL) | Info |
|-------------|-----|-----------|--------|----|---------------|-----------------|------|
| rs9830552   | 3   | 185659252 | A      | G  | 0.72          | 0.256(0.087)    | 0.97 |
| rs520190    | 3   | 187552212 | G      | C  | 0.66          | 0.231(0.085)    | 1.00 |
| rs4687189   | 3   | 190799944 | A      | T  | 0.68          | 0.322(0.084)    | 1.00 |
| rs35418010  | 3   | 191241721 | C      | A  | 0.08          | 0.625(0.169)    | 0.65 |
| rs113373751 | 4   | 1617253   | C      | T  | 0.02          | 0.848(0.27)     | 0.96 |
| rs61383215  | 4   | 2175792   | C      | G  | 0.25          | 0.418(0.091)    | 0.97 |
| rs4450871   | 4   | 4990298   | A      | G  | 0.44          | 0.25(0.081)     | 1.00 |
| rs17806570  | 4   | 7074960   | G      | A  | 0.01          | 1.149(0.349)    | 0.99 |
| rs34598003  | 4   | 7855824   | A      | C  | 0.09          | 0.454(0.139)    | 1.00 |
| rs188523465 | 4   | 8460229   | C      | A  | 0.01          | 1.129(0.313)    | 0.99 |
| rs80156179  | 4   | 13127540  | A      | C  | 0.04          | 0.692(0.191)    | 0.96 |
| rs2610990   | 4   | 18008232  | A      | G  | 0.69          | 0.372(0.084)    | 0.99 |
| rs12510296  | 4   | 38864769  | T      | C  | 0.87          | 0.436(0.114)    | 1.00 |
| rs113273467 | 4   | 39433069  | C      | T  | 0.04          | 0.525(0.201)    | 0.95 |
| rs114517877 | 4   | 48882941  | G      | A  | 0.99          | 0.912(0.369)    | 0.94 |
| rs75876517  | 4   | 56231419  | A      | G  | 0.02          | 0.771(0.264)    | 0.97 |
| rs61471505  | 4   | 57709951  | T      | C  | 0.99          | 1.13(0.336)     | 0.97 |
| rs56215320  | 4   | 73326758  | A      | G  | 0.94          | 0.789(0.166)    | 1.00 |
| rs1712373   | 4   | 82155309  | T      | C  | 0.87          | 0.74(0.135)     | 1.00 |
| rs546862736 | 4   | 87951286  | T      | TA | 0.87          | 0.422(0.129)    | 0.81 |
| rs4440183   | 4   | 88653805  | T      | C  | 0.18          | 0.33(0.103)     | 1.00 |
| rs76365623  | 4   | 106293217 | A      | G  | 0.96          | 0.681(0.222)    | 0.86 |
| rs200027431 | 4   | 109513624 | T      | TG | 0.30          | 0.239(0.089)    | 0.87 |
| rs36039505  | 4   | 114498912 | AT     | A  | 0.47          | 0.32(0.083)     | 0.98 |
| rs200724804 | 4   | 122605401 | CAAATA | C  | 0.01          | 1.1(0.314)      | 0.94 |
| rs72917850  | 4   | 123764913 | C      | T  | 0.99          | 1.438(0.332)    | 0.98 |
| rs77817768  | 4   | 144193026 | C      | T  | 0.03          | 1.018(0.263)    | 0.67 |
| rs144293266 | 4   | 145569140 | T      | TA | 0.57          | 0.276(0.08)     | 0.96 |
| rs7666450   | 4   | 145662842 | T      | C  | 0.61          | 0.316(0.08)     | 1.00 |
| rs789350    | 4   | 145868325 | G      | A  | 0.33          | 0.283(0.082)    | 0.99 |
| rs7681812   | 4   | 146041509 | C      | A  | 0.01          | 1.235(0.347)    | 1.00 |
| rs6535779   | 4   | 152169275 | T      | G  | 0.43          | 0.204(0.079)    | 1.00 |
| rs13152180  | 4   | 184042190 | C      | A  | 0.03          | 0.844(0.261)    | 0.81 |
| rs58925393  | 5   | 31707488  | A      | G  | 0.04          | 0.709(0.193)    | 1.00 |
| rs6898310   | 5   | 32629102  | T      | C  | 0.13          | 0.418(0.119)    | 1.00 |

Supplementary table 5: SNPs composing GRS2. Position is given in genome build 37. A1 is the trait-increasing allele, A2 is the other allele. A1-freq, effects, SEs, and imputation info scores are in the HCHS/SOL.

| SNP         | Chr | position  | A1   | A2  | A1-freq (SOL) | Effect-SE (SOL) | Info |
|-------------|-----|-----------|------|-----|---------------|-----------------|------|
| rs10071837  | 5   | 33381581  | C    | T   | 0.43          | 0.365(0.083)    | 1.00 |
| rs73076180  | 5   | 35990408  | C    | T   | 0.03          | 0.529(0.241)    | 0.99 |
| rs66929018  | 5   | 36945610  | CCTT | C   | 0.15          | 0.292(0.109)    | 1.00 |
| rs3812041   | 5   | 39425856  | G    | T   | 0.92          | 0.453(0.144)    | 1.00 |
| rs34742008  | 5   | 42684956  | G    | A   | 0.36          | 0.221(0.081)    | 1.00 |
| rs116136735 | 5   | 50588638  | G    | C   | 0.98          | 0.816(0.281)    | 0.98 |
| rs199619568 | 5   | 54700638  | C    | T   | 0.26          | 0.311(0.091)    | 0.95 |
| rs116741620 | 5   | 55030996  | A    | C   | 0.99          | 1.44(0.386)     | 0.94 |
| rs145300238 | 5   | 56260143  | AT   | A   | 0.95          | 0.421(0.176)    | 1.00 |
| rs72760562  | 5   | 64672716  | C    | T   | 0.94          | 0.472(0.157)    | 1.00 |
| rs376880321 | 5   | 67233975  | G    | GTA | 0.83          | 0.308(0.104)    | 0.94 |
| rs184886    | 5   | 67611486  | C    | T   | 0.26          | 0.317(0.088)    | 1.00 |
| rs34360238  | 5   | 72389335  | G    | GA  | 0.62          | 0.196(0.087)    | 0.83 |
| rs113347529 | 5   | 74026884  | C    | T   | 0.83          | 0.388(0.105)    | 1.00 |
| rs143014362 | 5   | 77419097  | G    | A   | 0.26          | 0.288(0.089)    | 1.00 |
| rs10942894  | 5   | 78831995  | G    | A   | 0.34          | 0.318(0.085)    | 1.00 |
| rs374737503 | 5   | 79694412  | C    | CT  | 0.87          | 0.275(0.12)     | 0.95 |
| rs34837872  | 5   | 88425656  | CT   | C   | 0.58          | 0.3(0.08)       | 0.96 |
| rs79693035  | 5   | 90281794  | G    | A   | 0.01          | 1.616(0.475)    | 0.66 |
| rs115187290 | 5   | 95531984  | A    | C   | 0.98          | 1.148(0.265)    | 0.98 |
| rs72785538  | 5   | 107992745 | G    | A   | 0.95          | 0.487(0.179)    | 0.97 |
| rs144052331 | 5   | 122650885 | T    | C   | 0.07          | 0.425(0.156)    | 0.98 |
| rs190496964 | 5   | 127212663 | T    | G   | 0.06          | 0.445(0.175)    | 0.89 |
| rs331077    | 5   | 127717797 | C    | T   | 0.36          | 0.164(0.08)     | 1.00 |
| rs55739237  | 5   | 129214686 | A    | G   | 0.99          | 1.227(0.343)    | 1.00 |
| rs34856425  | 5   | 131693717 | CA   | C   | 0.61          | 0.306(0.092)    | 0.72 |
| rs565244    | 5   | 134349385 | T    | G   | 0.42          | 0.271(0.081)    | 1.00 |
| rs145495948 | 5   | 139124845 | C    | T   | 0.04          | 0.752(0.225)    | 0.80 |
| rs78140389  | 5   | 141764150 | A    | T   | 0.20          | 0.418(0.11)     | 1.00 |
| rs536643285 | 5   | 168188926 | AT   | A   | 0.26          | 0.296(0.092)    | 0.87 |
| rs138988546 | 5   | 170905008 | T    | C   | 0.98          | 0.639(0.311)    | 0.82 |
| rs72845591  | 5   | 171193018 | G    | T   | 0.03          | 1.15(0.276)     | 0.77 |
| rs11134786  | 5   | 172707463 | C    | T   | 0.13          | 0.419(0.114)    | 1.00 |
| rs151255974 | 5   | 173067549 | A    | C   | 0.03          | 0.847(0.242)    | 0.84 |
| rs62402655  | 5   | 176116056 | C    | G   | 0.17          | 0.341(0.104)    | 0.99 |

Supplementary table 5: SNPs composing GRS2. Position is given in genome build 37. A1 is the trait-increasing allele, A2 is the other allele. A1-freq, effects, SEs, and imputation info scores are in the HCHS/SOL.

| SNP         | Chr | position  | A1  | A2                            | A1-freq (SOL) | Effect-SE (SOL) | Info |
|-------------|-----|-----------|-----|-------------------------------|---------------|-----------------|------|
| rs35091295  | 5   | 176572909 | CA  | C                             | 0.44          | 0.268(0.088)    | 0.81 |
| rs2411913   | 5   | 178495703 | T   | C                             | 0.36          | 0.28(0.081)     | 0.99 |
| rs4326106   | 5   | 179816613 | G   | C                             | 0.23          | 0.32(0.095)     | 0.99 |
| rs189203831 | 6   | 2048411   | C   | G                             | 0.03          | 0.499(0.243)    | 0.90 |
| rs3827784   | 6   | 6642405   | A   | G                             | 0.54          | 0.179(0.081)    | 1.00 |
| rs17673188  | 6   | 7394684   | A   | G                             | 0.12          | 0.34(0.118)     | 1.00 |
| rs270417    | 6   | 7729614   | T   | C                             | 0.20          | 0.462(0.099)    | 1.00 |
| rs9477443   | 6   | 17466722  | G   | C                             | 0.03          | 0.789(0.218)    | 0.99 |
|             | 6   | 19677675  | GAA | G                             | 0.92          | 0.381(0.141)    | 0.97 |
| rs3999543   | 6   | 26259807  | G   | A                             | 0.45          | 0.33(0.075)     | 1.00 |
| rs200754324 | 6   | 28529305  | C   | CTTTTTTTTTTTTTTTTTTTTTTTTTTTT | 0.05          | 0.56(0.176)     | 0.91 |
| rs6941207   | 6   | 29935153  | A   | G                             | 0.02          | 0.916(0.305)    | 0.89 |
| rs9266063   | 6   | 31319391  | A   | C                             | 0.42          | 0.342(0.076)    | 0.99 |
| rs2523501   | 6   | 31517903  | G   | C                             | 0.15          | 0.459(0.105)    | 1.00 |
| rs28732146  | 6   | 31561353  | T   | A                             | 0.16          | 0.441(0.103)    | 1.00 |
| rs117674603 | 6   | 32867455  | T   | G                             | 0.94          | 0.593(0.158)    | 1.00 |
| rs9469616   | 6   | 33820342  | G   | A                             | 0.27          | 0.35(0.087)     | 0.98 |
| rs79266576  | 6   | 33982527  | C   | T                             | 0.86          | 0.54(0.116)     | 1.00 |
| rs2780226   | 6   | 34199092  | C   | T                             | 0.69          | 0.619(0.083)    | 1.00 |
| rs202096393 | 6   | 34381239  | AT  | A                             | 0.76          | 0.566(0.096)    | 1.00 |
| rs9462078   | 6   | 35357974  | A   | G                             | 0.03          | 0.757(0.224)    | 1.00 |
| rs67056409  | 6   | 35383699  | A   | G                             | 0.26          | 0.396(0.09)     | 0.95 |
| rs6458239   | 6   | 41728916  | G   | A                             | 0.33          | 0.28(0.083)     | 1.00 |
| rs58195789  | 6   | 44694772  | T   | C                             | 0.91          | 0.446(0.135)    | 0.99 |
| rs74584915  | 6   | 45429621  | C   | T                             | 0.98          | 1.009(0.26)     | 1.00 |
| rs75994591  | 6   | 47309659  | A   | T                             | 0.04          | 0.72(0.186)     | 0.99 |
| rs73503193  | 6   | 71957899  | C   | T                             | 0.98          | 0.674(0.277)    | 1.00 |
| rs7741596   | 6   | 75992476  | C   | T                             | 0.88          | 0.28(0.116)     | 1.00 |
| rs34504496  | 6   | 80944546  | T   | TTA                           | 0.62          | 0.363(0.082)    | 0.99 |
| rs10943702  | 6   | 81069006  | T   | C                             | 0.65          | 0.342(0.083)    | 0.99 |
| rs7738407   | 6   | 81669593  | C   | T                             | 0.97          | 0.76(0.234)     | 1.00 |
|             | 6   | 82397025  | ATT | A                             | 0.98          | 1.021(0.291)    | 0.98 |
| rs75598173  | 6   | 85675999  | T   | A                             | 0.03          | 0.857(0.216)    | 0.99 |
| rs314279    | 6   | 105402083 | C   | A                             | 0.95          | 0.546(0.169)    | 0.98 |
| rs9384679   | 6   | 108864419 | C   | T                             | 0.43          | 0.258(0.08)     | 0.99 |

Supplementary table 5: SNPs composing GRS2. Position is given in genome build 37. A1 is the trait-increasing allele, A2 is the other allele. A1-freq, effects, SEs, and imputation info scores are in the HCHS/SOL.

| SNP         | Chr | position  | A1      | A2  | A1-freq (SOL) | Effect-SE (SOL) | Info |
|-------------|-----|-----------|---------|-----|---------------|-----------------|------|
| rs58292452  | 6   | 109840977 | CA      | C   | 0.65          | 0.189(0.085)    | 0.91 |
| rs75081751  | 6   | 116509676 | G       | A   | 0.98          | 0.687(0.303)    | 0.94 |
| rs74493914  | 6   | 117531389 | C       | A   | 0.04          | 0.756(0.202)    | 0.97 |
| rs112120142 | 6   | 117858455 | T       | C   | 0.09          | 0.401(0.139)    | 0.98 |
| rs9385389   | 6   | 126215486 | C       | G   | 0.61          | 0.266(0.081)    | 0.99 |
|             | 6   | 126898932 | ATTG    | A   | 0.19          | 0.33(0.099)     | 1.00 |
| rs7740107   | 6   | 130374461 | T       | A   | 0.85          | 0.4(0.112)      | 0.99 |
| rs35578859  | 6   | 131331554 | A       | AT  | 0.67          | 0.276(0.089)    | 0.81 |
| rs1074524   | 6   | 132531965 | C       | G   | 0.76          | 0.339(0.094)    | 0.94 |
| rs263180    | 6   | 142862768 | C       | A   | 0.34          | 0.357(0.08)     | 1.00 |
| rs147606953 | 6   | 143925986 | A       | G   | 0.98          | 1.019(0.297)    | 0.99 |
| rs200773052 | 6   | 146186073 | ACACACT | A   | 0.24          | 0.329(0.094)    | 0.95 |
| rs111825996 | 6   | 152129545 | AGGAG   | A   | 0.81          | 0.37(0.102)     | 0.96 |
| rs11968298  | 6   | 156798301 | A       | G   | 0.64          | 0.303(0.089)    | 0.79 |
| rs77917407  | 6   | 158958938 | G       | C   | 0.99          | 1.131(0.334)    | 0.99 |
| rs144173477 | 6   | 160633560 | G       | T   | 0.01          | 1.167(0.304)    | 0.97 |
| rs4709984   | 6   | 166196335 | A       | G   | 0.84          | 0.329(0.104)    | 1.00 |
| rs61409760  | 6   | 168713722 | A       | T   | 0.99          | 1.894(0.37)     | 0.96 |
|             | 6   | 169342214 | GGT     | G   | 0.22          | 0.317(0.103)    | 0.82 |
| rs1182199   | 7   | 2862542   | C       | A   | 0.32          | 0.36(0.082)     | 1.00 |
| rs6463762   | 7   | 8142124   | C       | G   | 0.73          | 0.352(0.092)    | 0.99 |
| rs62449512  | 7   | 12519991  | T       | A   | 0.15          | 0.424(0.109)    | 0.99 |
| rs2526626   | 7   | 19041337  | A       | G   | 0.65          | 0.23(0.083)     | 1.00 |
| rs142388714 | 7   | 19656782  | C       | G   | 0.98          | 1.071(0.276)    | 0.86 |
| rs79890064  | 7   | 20234948  | T       | A   | 0.99          | 1.262(0.358)    | 0.99 |
| rs540933159 | 7   | 23432021  | GA      | G   | 0.39          | 0.322(0.082)    | 0.94 |
| rs10951112  | 7   | 25882839  | G       | A   | 0.70          | 0.31(0.085)     | 1.00 |
| rs38520     | 7   | 28038052  | G       | A   | 0.07          | 0.425(0.149)    | 0.98 |
| rs564443608 | 7   | 28664615  | A       | AT  | 0.64          | 0.249(0.082)    | 0.96 |
| rs117470456 | 7   | 32811569  | C       | T   | 0.03          | 0.523(0.237)    | 1.00 |
| rs116421406 | 7   | 37968672  | A       | G   | 0.99          | 0.999(0.373)    | 1.00 |
| rs10951848  | 7   | 46258755  | A       | G   | 0.20          | 0.29(0.101)     | 1.00 |
| rs141053408 | 7   | 50550761  | T       | C   | 0.01          | 1.228(0.353)    | 0.97 |
| rs11769548  | 7   | 55654767  | G       | A   | 0.32          | 0.297(0.083)    | 1.00 |
| rs201823613 | 7   | 73210583  | A       | ATT | 0.86          | 0.333(0.11)     | 0.98 |

Supplementary table 5: SNPs composing GRS2. Position is given in genome build 37. A1 is the trait-increasing allele, A2 is the other allele. A1-freq, effects, SEs, and imputation info scores are in the HCHS/SOL.

| SNP         | Chr | position  | A1 | A2           | A1-freq (SOL) | Effect-SE (SOL) | Info |
|-------------|-----|-----------|----|--------------|---------------|-----------------|------|
| rs117760809 | 7   | 77472063  | T  | C            | 0.02          | 1.053(0.286)    | 1.00 |
| rs3731258   | 7   | 92463876  | A  | T            | 0.98          | 1.09(0.295)     | 0.98 |
| rs117285893 | 7   | 92621688  | T  | G            | 0.99          | 1.15(0.348)     | 1.00 |
| rs10225703  | 7   | 96151327  | G  | A            | 0.78          | 0.306(0.095)    | 0.99 |
| rs138837003 | 7   | 99616849  | A  | G            | 0.03          | 0.854(0.256)    | 0.85 |
| rs798903    | 7   | 120919495 | C  | T            | 0.43          | 0.23(0.078)     | 1.00 |
| rs4281069   | 7   | 134938058 | C  | T            | 0.24          | 0.328(0.094)    | 1.00 |
| rs10241468  | 7   | 137661808 | C  | G            | 0.95          | 0.65(0.188)     | 0.86 |
| rs6967829   | 7   | 148460244 | T  | A            | 0.98          | 0.968(0.287)    | 0.99 |
| rs1077871   | 7   | 150714644 | T  | C            | 0.98          | 1.118(0.319)    | 0.93 |
| rs293882    | 8   | 4589028   | T  | C            | 0.48          | 0.313(0.079)    | 1.00 |
| rs536019322 | 8   | 8792228   | C  | CAAAAAAAAA   | 0.57          | 0.291(0.083)    | 0.86 |
| rs1528624   | 8   | 13194983  | T  | G            | 0.60          | 0.302(0.078)    | 1.00 |
| rs4535741   | 8   | 22556424  | G  | T            | 0.05          | 0.465(0.198)    | 0.94 |
| rs112462737 | 8   | 23030280  | G  | T            | 0.05          | 0.668(0.192)    | 0.91 |
| rs6557710   | 8   | 23582292  | T  | C            | 0.05          | 0.485(0.179)    | 0.99 |
| rs80208218  | 8   | 24110312  | A  | G            | 0.99          | 0.862(0.33)     | 0.94 |
| rs66487916  | 8   | 25442824  | G  | A            | 0.20          | 0.289(0.095)    | 0.99 |
| rs145854061 | 8   | 27633704  | T  | TATTTG       | 0.96          | 0.488(0.194)    | 0.96 |
| rs10957010  | 8   | 49195245  | T  | C            | 0.97          | 0.644(0.216)    | 1.00 |
| rs73594229  | 8   | 57056932  | C  | T            | 0.01          | 1.159(0.332)    | 0.92 |
| rs74855688  | 8   | 75823213  | C  | T            | 0.88          | 0.431(0.121)    | 1.00 |
| rs1397734   | 8   | 76247693  | A  | G            | 0.89          | 0.485(0.125)    | 0.99 |
| rs543360906 | 8   | 78215912  | TA | T            | 0.50          | 0.322(0.08)     | 0.99 |
| rs75247033  | 8   | 109591144 | G  | T            | 0.98          | 0.655(0.285)    | 0.92 |
| rs2721946   | 8   | 116641960 | G  | T            | 0.62          | 0.339(0.08)     | 1.00 |
| rs143979902 | 8   | 117549164 | T  | C            | 0.98          | 0.899(0.334)    | 0.88 |
| rs544915454 | 8   | 120510488 | A  | T            | 0.94          | 0.378(0.204)    | 0.66 |
| rs57788150  | 8   | 124218378 | CA | C            | 0.16          | 0.305(0.124)    | 0.69 |
| rs897157    | 8   | 126671176 | C  | T            | 0.27          | 0.309(0.086)    | 1.00 |
| rs60188612  | 8   | 130848477 | A  | G            | 0.86          | 0.396(0.113)    | 0.97 |
| rs113406824 | 8   | 135470200 | T  | TGTTCTTTCTCC | 0.89          | 0.377(0.122)    | 0.99 |
| rs186521296 | 8   | 144932303 | G  | A            | 0.93          | 0.407(0.153)    | 0.87 |
| rs186440475 | 9   | 6213849   | C  | A            | 0.02          | 1.435(0.308)    | 0.80 |
| rs115245931 | 9   | 16678391  | G  | A            | 0.99          | 1.085(0.365)    | 0.89 |

Supplementary table 5: SNPs composing GRS2. Position is given in genome build 37. A1 is the trait-increasing allele, A2 is the other allele. A1-freq, effects, SEs, and imputation info scores are in the HCHS/SOL.

| SNP         | Chr | position  | A1                    | A2         | A1-freq (SOL) | Effect-SE (SOL) | Info |
|-------------|-----|-----------|-----------------------|------------|---------------|-----------------|------|
| rs10962679  | 9   | 16905441  | T                     | C          | 0.59          | 0.24(0.085)     | 0.99 |
| rs2809861   | 9   | 18393875  | G                     | T          | 0.67          | 0.302(0.081)    | 1.00 |
|             | 9   | 35897020  | TTTA                  | TTTATTATTA | 0.99          | 1.1(0.326)      | 0.96 |
| rs17061731  | 9   | 78478639  | T                     | C          | 0.95          | 0.709(0.175)    | 1.00 |
| rs10869713  | 9   | 78776057  | T                     | C          | 0.76          | 0.345(0.091)    | 1.00 |
| rs10868097  | 9   | 86716873  | A                     | G          | 0.11          | 0.368(0.124)    | 1.00 |
| rs7032797   | 9   | 89316235  | A                     | G          | 0.28          | 0.297(0.087)    | 1.00 |
| rs3937594   | 9   | 90882154  | C                     | T          | 0.38          | 0.281(0.086)    | 1.00 |
| rs115991603 | 9   | 94164312  | C                     | T          | 0.98          | 1.141(0.328)    | 0.88 |
| rs61660598  | 9   | 95604861  | A                     | T          | 0.02          | 0.863(0.28)     | 0.82 |
| rs7867660   | 9   | 97016564  | G                     | T          | 0.98          | 1.025(0.301)    | 0.94 |
| rs7019540   | 9   | 97598150  | C                     | T          | 0.97          | 0.609(0.229)    | 0.94 |
| rs201504349 | 9   | 98280324  | T                     | G          | 0.79          | 0.384(0.094)    | 1.00 |
|             | 9   | 99202640  | TTGTGTGTGTGTGTGTGTGTG |            | 0.95          | 0.826(0.197)    | 0.82 |
| rs1156850   | 9   | 100573164 | G                     | A          | 0.79          | 0.297(0.095)    | 0.99 |
| rs73493970  | 9   | 101555267 | C                     | T          | 0.97          | 0.639(0.233)    | 0.99 |
| rs10739211  | 9   | 108474679 | A                     | C          | 0.44          | 0.256(0.078)    | 1.00 |
| rs12552906  | 9   | 108668391 | G                     | A          | 0.03          | 0.79(0.238)     | 0.97 |
| rs111486101 | 9   | 109415667 | C                     | A          | 0.02          | 1.055(0.318)    | 0.83 |
| rs13285638  | 9   | 113577996 | A                     | G          | 0.01          | 0.98(0.364)     | 0.93 |
| rs10982061  | 9   | 116852076 | T                     | C          | 0.25          | 0.295(0.091)    | 1.00 |
| rs1414149   | 9   | 117969073 | G                     | A          | 0.12          | 0.355(0.121)    | 0.99 |
| rs537922848 | 9   | 118190450 | G                     | C          | 0.01          | 0.969(0.372)    | 0.78 |
| rs7033487   | 9   | 119129257 | T                     | C          | 0.09          | 0.476(0.135)    | 0.98 |
| rs33973593  | 9   | 119466008 | T                     | TA         | 0.75          | 0.354(0.095)    | 0.87 |
| rs59803809  | 9   | 133357572 | A                     | G          | 0.99          | 1.24(0.373)     | 1.00 |
| rs370771017 | 9   | 137466663 | C                     | T          | 0.98          | 1.113(0.311)    | 0.83 |
| rs12684650  | 9   | 139110654 | C                     | T          | 0.19          | 0.326(0.099)    | 1.00 |
| rs111688308 | 9   | 139549229 | T                     | C          | 0.99          | 1.617(0.375)    | 0.96 |
| rs200577408 | 10  | 5018224   | T                     | C          | 0.40          | 0.246(0.08)     | 0.98 |
| rs2399890   | 10  | 12819037  | A                     | G          | 0.67          | 0.499(0.082)    | 0.97 |
| rs72780347  | 10  | 25158161  | A                     | C          | 0.90          | 0.417(0.128)    | 1.00 |
| rs16928140  | 10  | 27962024  | C                     | A          | 0.99          | 1.246(0.37)     | 1.00 |
| rs71508066  | 10  | 52834982  | A                     | G          | 0.97          | 0.647(0.245)    | 0.82 |
| rs7901109   | 10  | 61332661  | A                     | G          | 0.97          | 0.551(0.235)    | 1.00 |

Supplementary table 5: SNPs composing GRS2. Position is given in genome build 37. A1 is the trait-increasing allele, A2 is the other allele. A1-freq, effects, SEs, and imputation info scores are in the HCHS/SOL.

| SNP         | Chr | position  | A1    | A2 | A1-freq (SOL) | Effect-SE (SOL) | Info |
|-------------|-----|-----------|-------|----|---------------|-----------------|------|
| rs10998040  | 10  | 70024955  | A     | G  | 0.74          | 0.271(0.093)    | 0.95 |
| rs11599886  | 10  | 70324991  | G     | T  | 0.71          | 0.41(0.09)      | 0.97 |
| rs58011543  | 10  | 81172074  | T     | C  | 0.02          | 0.967(0.265)    | 1.00 |
| rs9787602   | 10  | 92797805  | G     | A  | 0.60          | 0.225(0.08)     | 1.00 |
| rs117083034 | 10  | 97906444  | G     | A  | 0.99          | 1.226(0.349)    | 1.00 |
| rs12354453  | 10  | 101722669 | A     | G  | 0.01          | 1.251(0.358)    | 0.90 |
| rs2495703   | 10  | 102592150 | A     | G  | 0.20          | 0.352(0.103)    | 1.00 |
| rs11191410  | 10  | 104588923 | A     | C  | 0.81          | 0.338(0.099)    | 0.96 |
| rs7073079   | 10  | 105486697 | T     | C  | 0.88          | 0.446(0.12)     | 1.00 |
| rs79077667  | 10  | 121119048 | A     | G  | 0.01          | 1.193(0.394)    | 0.83 |
| rs1801043   | 10  | 123297585 | C     | T  | 0.09          | 0.481(0.137)    | 0.97 |
|             | 10  | 124182941 | CA    | C  | 0.29          | 0.304(0.089)    | 0.90 |
| rs7478422   | 10  | 126182864 | G     | C  | 0.55          | 0.256(0.077)    | 1.00 |
|             | 10  | 126930216 | C     | CA | 0.98          | 0.916(0.298)    | 1.00 |
| rs141962143 | 10  | 127757565 | A     | G  | 0.98          | 1.055(0.329)    | 0.83 |
| rs7483271   | 11  | 384067    | C     | T  | 0.72          | 0.254(0.084)    | 1.00 |
| rs112492    | 11  | 1989274   | G     | A  | 0.67          | 0.295(0.083)    | 0.94 |
| rs59148929  | 11  | 2118815   | A     | G  | 0.96          | 0.759(0.206)    | 0.98 |
| rs200208191 | 11  | 2974188   | T     | C  | 0.32          | 0.331(0.085)    | 1.00 |
| rs79583808  | 11  | 12550760  | C     | T  | 0.02          | 0.904(0.256)    | 0.93 |
| rs61879825  | 11  | 12684265  | T     | G  | 0.05          | 0.441(0.188)    | 0.90 |
| rs112950946 | 11  | 13127307  | CT    | C  | 0.02          | 0.671(0.272)    | 0.99 |
| rs76820037  | 11  | 14157568  | A     | G  | 0.01          | 1.151(0.33)     | 0.91 |
| rs76439856  | 11  | 17288241  | C     | T  | 0.06          | 0.417(0.167)    | 0.98 |
| rs499243    | 11  | 30504680  | G     | A  | 0.90          | 0.478(0.136)    | 1.00 |
| rs373797236 | 11  | 45806550  | T     | C  | 0.95          | 0.597(0.199)    | 0.74 |
| rs72895718  | 11  | 47853793  | T     | C  | 0.97          | 0.848(0.242)    | 0.92 |
| rs9734073   | 11  | 56358320  | C     | A  | 0.07          | 0.392(0.161)    | 0.91 |
| rs2307266   | 11  | 65116491  | T     | C  | 0.98          | 0.802(0.252)    | 1.00 |
| rs112965728 | 11  | 66629986  | A     | C  | 0.98          | 0.805(0.286)    | 1.00 |
| rs4930590   | 11  | 68421867  | T     | C  | 0.39          | 0.24(0.081)     | 1.00 |
| rs148130259 | 11  | 69076783  | G     | C  | 0.94          | 0.602(0.173)    | 0.95 |
| rs61885517  | 11  | 70023850  | T     | C  | 0.99          | 1.209(0.364)    | 0.92 |
| rs7949034   | 11  | 74575792  | C     | T  | 0.99          | 0.996(0.346)    | 0.95 |
| rs143746709 | 11  | 75276660  | GACAC | G  | 0.73          | 0.341(0.088)    | 1.00 |



Supplementary table 5: SNPs composing GRS2. Position is given in genome build 37. A1 is the trait-increasing allele, A2 is the other allele. A1-freq, effects, SEs, and imputation info scores are in the HCHS/SOL.

| SNP         | Chr | position  | A1 | A2   | A1-freq (SOL) | Effect-SE (SOL) | Info |
|-------------|-----|-----------|----|------|---------------|-----------------|------|
|             | 11  | 118821132 | A  | AT   | 0.56          | 0.314(0.088)    | 0.75 |
| rs61900895  | 11  | 120404384 | C  | T    | 0.04          | 0.764(0.228)    | 0.82 |
| rs11600359  | 11  | 123027134 | G  | A    | 0.33          | 0.252(0.081)    | 0.99 |
| rs116960047 | 11  | 128532286 | G  | C    | 0.03          | 0.906(0.254)    | 0.91 |
| rs143338675 | 12  | 740240    | T  | C    | 0.97          | 1.005(0.247)    | 0.84 |
| rs73601904  | 12  | 1580026   | G  | A    | 0.01          | 1.266(0.349)    | 0.95 |
| rs17818498  | 12  | 11873288  | C  | T    | 0.75          | 0.318(0.089)    | 1.00 |
| rs7977653   | 12  | 12812980  | T  | C    | 0.10          | 0.435(0.13)     | 1.00 |
| rs11522846  | 12  | 14447769  | A  | C    | 0.81          | 0.325(0.099)    | 1.00 |
| rs12370696  | 12  | 20539795  | G  | A    | 0.17          | 0.349(0.103)    | 0.99 |
| rs11045419  | 12  | 20885438  | G  | T    | 0.03          | 0.723(0.21)     | 1.00 |
| rs2686328   | 12  | 24414760  | A  | G    | 0.05          | 0.588(0.179)    | 0.97 |
| rs10843030  | 12  | 28095013  | G  | A    | 0.89          | 0.455(0.128)    | 1.00 |
| rs7954929   | 12  | 28822422  | G  | A    | 0.02          | 0.75(0.273)     | 0.95 |
| rs10843438  | 12  | 29648275  | G  | A    | 0.40          | 0.246(0.081)    | 1.00 |
| rs74385174  | 12  | 46764254  | A  | G    | 0.01          | 0.768(0.325)    | 0.92 |
| rs562541296 | 12  | 53981147  | C  | CAAA | 0.49          | 0.354(0.081)    | 0.99 |
| rs35497799  | 12  | 56448641  | TA | T    | 0.44          | 0.166(0.088)    | 0.75 |
| rs137928860 | 12  | 56970939  | G  | A    | 0.02          | 0.887(0.28)     | 0.96 |
| rs61937404  | 12  | 58401907  | C  | T    | 0.04          | 0.561(0.188)    | 0.99 |
| rs61935579  | 12  | 60195749  | G  | A    | 0.01          | 0.589(0.317)    | 0.94 |
| rs73320411  | 12  | 65755588  | T  | C    | 0.01          | 1.123(0.344)    | 0.98 |
| rs1351394   | 12  | 66351826  | T  | C    | 0.64          | 0.359(0.081)    | 1.00 |
| rs549164105 | 12  | 69609897  | A  | G    | 0.98          | 0.886(0.332)    | 0.78 |
| rs4842685   | 12  | 90152367  | A  | G    | 0.55          | 0.175(0.081)    | 0.96 |
| rs117633021 | 12  | 93954065  | T  | C    | 0.90          | 0.551(0.128)    | 0.98 |
| rs199778235 | 12  | 94181091  | T  | G    | 0.71          | 0.404(0.093)    | 0.89 |
| rs66500550  | 12  | 102422359 | C  | G    | 0.13          | 0.353(0.118)    | 1.00 |
| rs56900627  | 12  | 102680679 | A  | G    | 0.07          | 0.54(0.152)     | 1.00 |
| rs4764887   | 12  | 102823900 | G  | A    | 0.08          | 0.512(0.148)    | 1.00 |
| rs61942844  | 12  | 103081602 | G  | A    | 0.95          | 0.59(0.169)     | 1.00 |
|             | 12  | 104262029 | C  | CAA  | 0.39          | 0.355(0.087)    | 0.95 |
| rs6539281   | 12  | 107149012 | T  | C    | 0.76          | 0.437(0.092)    | 1.00 |
| rs4767370   | 12  | 116227757 | A  | G    | 0.31          | 0.241(0.082)    | 1.00 |
| rs58697440  | 12  | 117500488 | G  | A    | 0.94          | 0.379(0.164)    | 1.00 |

Supplementary table 5: SNPs composing GRS2. Position is given in genome build 37. A1 is the trait-increasing allele, A2 is the other allele. A1-freq, effects, SEs, and imputation info scores are in the HCHS/SOL.

| SNP         | Chr | position  | A1           | A2          | A1-freq (SOL) | Effect-SE (SOL) | Info |
|-------------|-----|-----------|--------------|-------------|---------------|-----------------|------|
| rs10849824  | 12  | 121387480 | T            | C           | 0.29          | 0.276(0.088)    | 1.00 |
| rs114351527 | 12  | 122260547 | C            | T           | 0.01          | 1.291(0.367)    | 1.00 |
| rs150108949 | 12  | 123914732 | A            | G           | 0.07          | 0.462(0.162)    | 0.90 |
| rs79201062  | 12  | 124719241 | T            | C           | 0.91          | 0.48(0.133)     | 1.00 |
|             | 12  | 125003673 | CACACAG      | C           | 0.02          | 1.108(0.296)    | 0.84 |
| rs111917343 | 13  | 21576084  | T            | G           | 0.99          | 1.111(0.359)    | 0.98 |
| rs74691952  | 13  | 29991687  | T            | C           | 0.98          | 0.694(0.306)    | 0.89 |
| rs373928454 | 13  | 32993549  | ATTTTTTTTTTT | ATTTTTTTTTT | 0.96          | 0.67(0.215)     | 0.87 |
| rs74045718  | 13  | 33807096  | G            | A           | 0.97          | 0.581(0.214)    | 0.99 |
| rs2477600   | 13  | 46865607  | C            | A           | 0.07          | 0.468(0.153)    | 1.00 |
| rs59602687  | 13  | 49377156  | T            | A           | 0.89          | 0.321(0.125)    | 1.00 |
| rs7334755   | 13  | 50469913  | C            | T           | 0.16          | 0.379(0.107)    | 0.99 |
| rs1149822   | 13  | 51134226  | C            | T           | 0.65          | 0.422(0.09)     | 1.00 |
| rs2210725   | 13  | 74977068  | T            | C           | 0.54          | 0.243(0.079)    | 0.98 |
| rs17740589  | 13  | 78677267  | T            | C           | 0.08          | 0.439(0.141)    | 0.99 |
| rs9601305   | 13  | 80613204  | T            | G           | 0.27          | 0.125(0.088)    | 0.98 |
| rs17073242  | 13  | 81321159  | C            | T           | 0.15          | 0.261(0.108)    | 1.00 |
| rs7323996   | 13  | 91991011  | T            | G           | 0.91          | 0.425(0.136)    | 1.00 |
| rs12018264  | 13  | 114942160 | A            | G           | 0.09          | 0.39(0.132)     | 0.99 |
| rs397719332 | 14  | 21861133  | G            | GA          | 0.46          | 0.233(0.091)    | 0.70 |
| rs35081830  | 14  | 23941883  | A            | G           | 0.03          | 0.67(0.216)     | 1.00 |
| rs4982907   | 14  | 24876002  | T            | C           | 0.61          | 0.264(0.084)    | 1.00 |
| rs117151972 | 14  | 35881388  | C            | T           | 0.01          | 1.182(0.373)    | 0.90 |
| rs4900639   | 14  | 37350651  | C            | T           | 0.38          | 0.245(0.083)    | 1.00 |
| rs141425845 | 14  | 37670178  | T            | G           | 0.97          | 0.663(0.215)    | 0.94 |
| rs73271542  | 14  | 55104106  | G            | A           | 0.33          | 0.349(0.086)    | 0.88 |
| rs1752429   | 14  | 59931997  | A            | G           | 0.99          | 1.369(0.363)    | 1.00 |
| rs12883754  | 14  | 61006889  | T            | C           | 0.71          | 0.237(0.087)    | 1.00 |
| rs8004904   | 14  | 65433717  | A            | G           | 0.40          | 0.241(0.081)    | 0.97 |
| rs112841824 | 14  | 68604861  | A            | AT          | 0.49          | 0.193(0.08)     | 0.96 |
| rs148543698 | 14  | 74081376  | G            | A           | 0.01          | 0.826(0.364)    | 0.99 |
| rs17102009  | 14  | 75160123  | T            | G           | 0.02          | 1.123(0.278)    | 0.96 |
| rs145717876 | 14  | 92649836  | CATATAT      | C           | 0.23          | 0.328(0.092)    | 0.97 |
| rs1007343   | 14  | 102980667 | A            | G           | 0.94          | 0.713(0.162)    | 0.97 |
|             | 14  | 103671973 | CA           | C           | 0.65          | 0.245(0.085)    | 0.89 |

Supplementary table 5: SNPs composing GRS2. Position is given in genome build 37. A1 is the trait-increasing allele, A2 is the other allele. A1-freq, effects, SEs, and imputation info scores are in the HCHS/SOL.

| SNP         | Chr | position  | A1 | A2    | A1-freq (SOL) | Effect-SE (SOL) | Info |
|-------------|-----|-----------|----|-------|---------------|-----------------|------|
| rs145064777 | 15  | 38728466  | C  | T     | 0.97          | 0.606(0.232)    | 0.87 |
| rs17677811  | 15  | 42021512  | T  | C     | 0.03          | 0.799(0.228)    | 1.00 |
| rs10519170  | 15  | 48686175  | A  | G     | 0.16          | 0.312(0.106)    | 1.00 |
| rs75719128  | 15  | 51404622  | A  | G     | 0.99          | 0.858(0.335)    | 0.99 |
| rs28757154  | 15  | 51550667  | G  | A     | 0.17          | 0.481(0.106)    | 0.99 |
| rs74677486  | 15  | 61266411  | T  | C     | 0.02          | 0.824(0.299)    | 0.92 |
| rs17238210  | 15  | 62227395  | C  | G     | 0.12          | 0.368(0.123)    | 1.00 |
| rs78880342  | 15  | 63341262  | T  | C     | 0.04          | 0.555(0.189)    | 0.99 |
| rs116957410 | 15  | 66846232  | A  | G     | 0.97          | 0.962(0.275)    | 0.78 |
| rs7179840   | 15  | 67458930  | C  | T     | 0.77          | 0.34(0.093)     | 1.00 |
| rs7177804   | 15  | 69915374  | T  | C     | 0.12          | 0.402(0.124)    | 0.95 |
| rs1655216   | 15  | 70552355  | G  | A     | 0.08          | 0.502(0.143)    | 1.00 |
| rs535354133 | 15  | 72058133  | C  | G     | 0.98          | 0.984(0.35)     | 0.63 |
| rs71397246  | 15  | 72781549  | G  | A     | 0.97          | 0.76(0.255)     | 0.92 |
| rs148647622 | 15  | 74365264  | T  | G     | 0.83          | 0.33(0.114)     | 0.80 |
| rs80260619  | 15  | 76636106  | G  | T     | 0.93          | 0.566(0.152)    | 0.96 |
| rs139520377 | 15  | 82001442  | C  | CAGAT | 0.20          | 0.326(0.105)    | 0.88 |
| rs72749535  | 15  | 82448283  | T  | C     | 0.01          | 0.95(0.376)     | 0.99 |
| rs143995566 | 15  | 84206358  | AT | A     | 0.06          | 0.495(0.167)    | 0.95 |
| rs34858685  | 15  | 84595365  | C  | CT    | 0.59          | 0.329(0.095)    | 0.65 |
| rs289415    | 15  | 85561953  | A  | G     | 0.06          | 0.505(0.164)    | 0.99 |
|             | 15  | 89360788  | GA | GAA   | 0.56          | 0.316(0.08)     | 0.98 |
| rs8037675   | 15  | 89407786  | G  | A     | 0.04          | 0.967(0.184)    | 0.99 |
| rs6496581   | 15  | 89966555  | G  | A     | 0.49          | 0.35(0.083)     | 0.99 |
| rs145420978 | 15  | 94025417  | A  | G     | 0.01          | 1.224(0.364)    | 0.86 |
| rs55713638  | 15  | 94652520  | C  | T     | 0.26          | 0.3(0.089)      | 0.99 |
| rs2871865   | 15  | 99194896  | C  | G     | 0.18          | 0.424(0.101)    | 1.00 |
| rs72755233  | 15  | 100692953 | G  | A     | 0.04          | 0.776(0.195)    | 1.00 |
| rs113359671 | 15  | 101629363 | T  | C     | 0.01          | 1.264(0.368)    | 0.97 |
| rs60367374  | 15  | 102000365 | T  | C     | 0.98          | 0.873(0.272)    | 0.97 |
| rs9930455   | 16  | 941454    | A  | G     | 0.98          | 1.003(0.282)    | 0.86 |
| rs61249384  | 16  | 1107865   | G  | A     | 0.06          | 0.75(0.205)     | 0.56 |
| rs546097317 | 16  | 2429677   | CT | C     | 0.70          | 0.241(0.097)    | 0.71 |
| rs115675162 | 16  | 2524885   | C  | T     | 0.01          | 0.912(0.363)    | 0.99 |
| rs55679833  | 16  | 3303817   | A  | C     | 0.98          | 0.759(0.285)    | 0.74 |

Supplementary table 5: SNPs composing GRS2. Position is given in genome build 37. A1 is the trait-increasing allele, A2 is the other allele. A1-freq, effects, SEs, and imputation info scores are in the HCHS/SOL.

| SNP         | Chr | position | A1     | A2        | A1-freq (SOL) | Effect-SE (SOL) | Info |
|-------------|-----|----------|--------|-----------|---------------|-----------------|------|
| rs7190663   | 16  | 4011223  | C      | T         | 0.06          | 0.478(0.163)    | 0.90 |
| rs138472327 | 16  | 5001600  | T      | G         | 0.99          | 1.373(0.381)    | 0.88 |
| rs139547389 | 16  | 14475955 | T      | G         | 0.94          | 0.485(0.176)    | 0.85 |
| rs566920319 | 16  | 20984061 | A      | ATTTTTTTT | 0.70          | 0.255(0.087)    | 0.90 |
| rs554005300 | 16  | 29948348 | T      | A         | 0.02          | 0.786(0.27)     | 0.84 |
| rs12598290  | 16  | 50012084 | A      | G         | 0.04          | 0.665(0.221)    | 0.79 |
| rs61539933  | 16  | 51035389 | T      | C         | 0.20          | 0.285(0.098)    | 0.96 |
| rs568346258 | 16  | 53379979 | A      | G         | 0.04          | 0.689(0.227)    | 0.86 |
| rs397745266 | 16  | 67197776 | CG     | C         | 0.05          | 0.723(0.216)    | 0.65 |
| rs56749289  | 16  | 70087637 | C      | G         | 0.91          | 0.465(0.136)    | 0.93 |
| rs1065360   | 16  | 72110781 | T      | C         | 0.06          | 0.493(0.17)     | 0.97 |
| rs58241006  | 16  | 75373485 | C      | A         | 0.04          | 0.808(0.213)    | 1.00 |
| rs111618805 | 16  | 81765989 | A      | G         | 0.98          | 1.018(0.327)    | 0.85 |
| rs11646832  | 16  | 81986537 | G      | C         | 0.07          | 0.408(0.149)    | 0.99 |
| rs116910794 | 16  | 84784094 | C      | T         | 0.99          | 1.201(0.348)    | 0.95 |
| rs1809844   | 16  | 86188011 | C      | T         | 0.43          | 0.193(0.077)    | 1.00 |
|             | 16  | 86810226 | CAAAAT | GAAAAT    | 0.01          | 1.176(0.353)    | 0.89 |
| rs75665989  | 16  | 87211260 | G      | A         | 0.96          | 0.652(0.191)    | 1.00 |
| rs72558364  | 16  | 88715596 | T      | C         | 0.01          | 1.277(0.376)    | 0.76 |
| rs455868    | 16  | 89649675 | G      | A         | 0.71          | 0.258(0.089)    | 0.92 |
| rs553336215 | 16  | 89994932 | A      | ATT       | 0.49          | 0.318(0.082)    | 0.99 |
| rs139423936 | 17  | 837430   | C      | A         | 0.98          | 1.075(0.338)    | 0.76 |
| rs6503029   | 17  | 7398512  | A      | G         | 0.83          | 0.32(0.102)     | 1.00 |
| rs4468690   | 17  | 7940754  | T      | C         | 0.89          | 0.31(0.12)      | 1.00 |
| rs201639798 | 17  | 12071235 | T      | G         | 0.02          | 1.104(0.324)    | 0.78 |
| rs12165024  | 17  | 21184320 | G      | C         | 0.02          | 0.768(0.27)     | 0.98 |
| rs61737980  | 17  | 27957939 | C      | T         | 0.01          | 0.991(0.348)    | 1.00 |
| rs6505216   | 17  | 29206421 | G      | T         | 0.21          | 0.548(0.101)    | 0.90 |
| rs568379196 | 17  | 30134539 | GTT    | G         | 0.06          | 0.651(0.172)    | 0.81 |
| rs111500107 | 17  | 36990451 | A      | G         | 0.97          | 0.652(0.229)    | 0.93 |
| rs3136685   | 17  | 38719799 | T      | C         | 0.77          | 0.237(0.091)    | 1.00 |
| rs10671974  | 17  | 40911425 | G      | GT        | 0.56          | 0.269(0.078)    | 0.95 |
| rs4792867   | 17  | 43249444 | C      | T         | 0.21          | 0.292(0.094)    | 1.00 |
| rs60458827  | 17  | 44853574 | T      | C         | 0.97          | 0.572(0.241)    | 0.98 |
| rs59934550  | 17  | 46242955 | T      | C         | 0.27          | 0.29(0.087)     | 1.00 |

Supplementary table 5: SNPs composing GRS2. Position is given in genome build 37. A1 is the trait-increasing allele, A2 is the other allele. A1-freq, effects, SEs, and imputation info scores are in the HCHS/SOL.

| SNP         | Chr | position | A1  | A2 | A1-freq (SOL) | Effect-SE (SOL) | Info |
|-------------|-----|----------|-----|----|---------------|-----------------|------|
| rs35772538  | 17  | 46431254 | C   | T  | 0.82          | 0.298(0.104)    | 1.00 |
| rs2546494   | 17  | 46959525 | G   | A  | 0.40          | 0.274(0.079)    | 0.99 |
| rs634370    | 17  | 47287109 | G   | A  | 0.32          | 0.295(0.084)    | 1.00 |
| rs9908227   | 17  | 49388825 | A   | G  | 0.98          | 0.988(0.298)    | 0.99 |
| rs13341071  | 17  | 54215406 | C   | T  | 0.99          | 1.384(0.321)    | 0.99 |
| rs8073955   | 17  | 54685404 | A   | G  | 0.98          | 0.849(0.269)    | 0.97 |
| rs758467    | 17  | 59314257 | A   | C  | 0.84          | 0.465(0.106)    | 1.00 |
| rs2079795   | 17  | 59496649 | T   | C  | 0.58          | 0.353(0.078)    | 1.00 |
| rs60026833  | 17  | 61647986 | T   | G  | 0.95          | 0.739(0.185)    | 0.98 |
| rs6175      | 17  | 61996196 | G   | C  | 0.96          | 0.869(0.216)    | 0.89 |
| rs8072643   | 17  | 63513501 | G   | T  | 0.98          | 0.789(0.294)    | 0.85 |
| rs884167    | 17  | 66471094 | T   | A  | 0.12          | 0.332(0.121)    | 0.96 |
| rs146263262 | 17  | 68144637 | A   | AT | 0.99          | 0.973(0.329)    | 0.99 |
| rs12952286  | 17  | 70046189 | C   | T  | 0.71          | 0.339(0.084)    | 0.99 |
| rs1671015   | 17  | 73572128 | C   | T  | 0.04          | 0.526(0.199)    | 1.00 |
| rs117259737 | 17  | 76802903 | G   | A  | 0.01          | 1.193(0.359)    | 0.88 |
| rs111303369 | 17  | 79516190 | C   | T  | 0.96          | 0.654(0.203)    | 0.99 |
| rs373411465 | 17  | 79971752 | T   | G  | 0.02          | 1.062(0.307)    | 0.63 |
| rs58112781  | 18  | 2639976  | A   | G  | 0.72          | 0.25(0.089)     | 1.00 |
| rs80110115  | 18  | 13254043 | A   | G  | 0.95          | 0.564(0.168)    | 1.00 |
| rs7233852   | 18  | 19601009 | T   | C  | 0.94          | 0.452(0.163)    | 1.00 |
| rs369768441 | 18  | 20673393 | CGT | C  | 0.65          | 0.309(0.084)    | 0.94 |
| rs75026826  | 18  | 45884142 | T   | C  | 0.98          | 0.874(0.26)     | 1.00 |
| rs12963372  | 18  | 46184974 | G   | A  | 0.93          | 0.547(0.152)    | 1.00 |
| rs74561403  | 18  | 46378452 | A   | T  | 0.90          | 0.461(0.128)    | 1.00 |
| rs833502    | 18  | 46634577 | T   | G  | 0.24          | 0.255(0.092)    | 1.00 |
| rs534777750 | 18  | 46981114 | C   | CA | 0.21          | 0.266(0.095)    | 0.96 |
| rs4609950   | 18  | 57643039 | C   | T  | 0.03          | 0.611(0.267)    | 0.77 |
| rs112925811 | 18  | 75047602 | A   | G  | 0.99          | 1.02(0.36)      | 0.99 |
| rs76338108  | 18  | 77280063 | C   | T  | 0.06          | 0.453(0.158)    | 1.00 |
| rs9967630   | 19  | 2099820  | G   | A  | 0.45          | 0.318(0.079)    | 1.00 |
| rs113124571 | 19  | 3306072  | G   | A  | 0.63          | 0.357(0.088)    | 0.83 |
| rs35299700  | 19  | 4828938  | T   | C  | 0.82          | 0.282(0.099)    | 0.98 |
| rs397976349 | 19  | 7207592  | C   | CA | 0.42          | 0.256(0.077)    | 0.99 |
| rs62621197  | 19  | 8670147  | C   | T  | 0.04          | 0.695(0.207)    | 0.98 |

Supplementary table 5: SNPs composing GRS2. Position is given in genome build 37. A1 is the trait-increasing allele, A2 is the other allele. A1-freq, effects, SEs, and imputation info scores are in the HCHS/SOL.

| SNP         | Chr | position | A1      | A2 | A1-freq (SOL) | Effect-SE (SOL) | Info |
|-------------|-----|----------|---------|----|---------------|-----------------|------|
| rs12720260  | 19  | 10478144 | C       | T  | 0.96          | 0.513(0.195)    | 1.00 |
| rs76359824  | 19  | 10721530 | G       | A  | 0.09          | 0.517(0.144)    | 0.92 |
| rs538143217 | 19  | 12285672 | CT      | C  | 0.03          | 0.715(0.254)    | 0.74 |
| rs3745163   | 19  | 17337555 | C       | A  | 0.24          | 0.34(0.091)     | 0.99 |
| rs11669075  | 19  | 19809052 | T       | C  | 0.85          | 0.368(0.109)    | 1.00 |
| rs55705533  | 19  | 19882950 | A       | G  | 0.96          | 0.789(0.205)    | 0.88 |
| rs146716239 | 19  | 31211704 | CT      | C  | 0.98          | 1.033(0.306)    | 0.96 |
| rs80097829  | 19  | 38520041 | T       | C  | 0.98          | 0.525(0.264)    | 0.98 |
| rs34326763  | 19  | 41729713 | C       | G  | 0.96          | 0.705(0.22)     | 0.74 |
| rs79680196  | 19  | 42680220 | A       | G  | 0.03          | 0.674(0.247)    | 0.92 |
| rs8100565   | 19  | 44308764 | G       | A  | 0.61          | 0.312(0.082)    | 0.99 |
| rs73036937  | 19  | 48318764 | T       | C  | 0.86          | 0.342(0.111)    | 0.96 |
| rs199841013 | 20  | 3970137  | CA      | C  | 0.75          | 0.341(0.099)    | 0.79 |
| rs6107854   | 20  | 6611463  | C       | G  | 0.02          | 0.891(0.3)      | 0.98 |
| rs6117484   | 20  | 6865658  | G       | A  | 0.94          | 0.494(0.157)    | 1.00 |
| rs34280455  | 20  | 17755576 | G       | A  | 0.84          | 0.562(0.105)    | 1.00 |
| rs7261425   | 20  | 20068635 | C       | G  | 0.26          | 0.308(0.088)    | 0.99 |
| rs34554466  | 20  | 20368535 | A       | T  | 0.28          | 0.272(0.087)    | 0.99 |
| rs79248076  | 20  | 21218860 | G       | T  | 0.99          | 1.262(0.328)    | 1.00 |
| rs574091278 | 20  | 32146999 | C       | T  | 0.99          | 0.953(0.329)    | 1.00 |
|             | 20  | 33769075 | ATTTT   | A  | 0.54          | 0.293(0.081)    | 1.00 |
| rs143384    | 20  | 34025756 | G       | A  | 0.58          | 0.343(0.084)    | 1.00 |
| rs200679606 | 20  | 34519992 | G       | GT | 0.79          | 0.395(0.095)    | 0.98 |
| rs1291126   | 20  | 35509409 | G       | T  | 0.34          | 0.396(0.087)    | 0.99 |
| rs12479877  | 20  | 38669431 | C       | T  | 0.03          | 0.747(0.248)    | 0.97 |
| rs8119476   | 20  | 47690136 | T       | C  | 0.83          | 0.414(0.103)    | 1.00 |
| rs117909972 | 20  | 48791879 | A       | G  | 0.97          | 0.87(0.239)     | 0.92 |
| rs7272702   | 20  | 55033782 | T       | G  | 0.98          | 1.033(0.302)    | 1.00 |
| rs113294200 | 20  | 57479358 | TTTAACA | T  | 0.98          | 1.105(0.311)    | 0.94 |
| rs79979196  | 20  | 58006680 | G       | T  | 0.99          | 1.207(0.328)    | 0.96 |
| rs73918285  | 20  | 61147693 | C       | T  | 0.93          | 0.413(0.156)    | 0.97 |
| rs375106574 | 21  | 27417594 | TA      | T  | 0.03          | 0.981(0.281)    | 0.72 |
| rs75524323  | 21  | 35659884 | G       | A  | 0.86          | 0.348(0.123)    | 1.00 |
| rs11910230  | 21  | 39439370 | C       | T  | 0.60          | 0.267(0.08)     | 1.00 |
| rs552062473 | 21  | 47553708 | T       | C  | 0.98          | 1.05(0.305)     | 0.97 |

Supplementary table 5: SNPs composing GRS2. Position is given in genome build 37. A1 is the trait-increasing allele, A2 is the other allele. A1-freq, effects, SEs, and imputation info scores are in the HCHS/SOL.

| SNP         | Chr | position | A1 | A2   | A1-freq (SOL) | Effect-SE (SOL) | Info |
|-------------|-----|----------|----|------|---------------|-----------------|------|
| rs9621564   | 22  | 33182007 | G  | A    | 0.75          | 0.295(0.093)    | 0.92 |
| rs145530421 | 22  | 37921434 | T  | C    | 0.98          | 0.82(0.294)     | 0.88 |
| rs12157359  | 22  | 39113405 | C  | T    | 0.01          | 1.189(0.331)    | 0.96 |
| rs117210036 | 22  | 39732190 | G  | T    | 0.97          | 0.649(0.218)    | 0.93 |
| rs74408194  | 22  | 45624439 | G  | C    | 0.97          | 1.012(0.275)    | 0.71 |
|             | X   | 3114297  | T  | TTTA | 0.55          | 0.22(0.071)     | 0.80 |

| PRS                             | Descriptions                                                                                             | n SNPs | Height variance explained | Estimated effect size (95% CI) |
|---------------------------------|----------------------------------------------------------------------------------------------------------|--------|---------------------------|--------------------------------|
| PRS1 (primary)                  | Constructed based on GWAS in European, African, and Asian populations                                    | 801    | 9%                        | 1.86 (1.75-1.97)               |
| PRS2 (primary)                  | Adapted to HCHS/SOL Hispanics/Latinos by using most associated SNPs from each genomic association region | 604    | 29%                       | 3.29 (3.20-3.38)               |
| LD-pruned PRS1                  | SNPs removed from PRS1 so that of remaining SNPs, every pair of SNP has LD below 0.5                     | 726    | 8.83%                     | 1.87 (1.76,1.98)               |
| LD-pruned PRS2                  | SNPs removed from PRS2 so that of remaining SNPs, every pair of SNP has LD below 0.5                     | 597    | 28.92%                    | 3.3 (3.21,3.39)                |
| PRS2- multiple testing adjusted | SNPs were selected from LD-pruned PRS2 if $p$ -value $\leq 0.05/\text{effSNP}$ .                         | 93     | 9.23%                     | 1.83 (1.73-1.94)               |

Supplementary table 6: **The PRSs and height.** Comparison between the primary and sensitivity analyses PRSs. Estimated effect sizes refer to change in height per 1-SD increase in the PRS.

| Trait                                                  | Sample size | PRS1 (LD pruned)              |         | PRS2 (LD pruned)              |         | PRS2 (LD, 0.05/effSNP)        |         |
|--------------------------------------------------------|-------------|-------------------------------|---------|-------------------------------|---------|-------------------------------|---------|
|                                                        |             | Effects (95% CI) <sup>a</sup> | P-value | Effects (95% CI) <sup>a</sup> | P-value | Effects (95% CI) <sup>a</sup> | P-value |
| <b>Anthropometry</b>                                   |             |                               |         |                               |         |                               |         |
| BMI                                                    | 12750       | 0 (-0.018,0.019)              | 0.993   | 0 (-0.018,0.017)              | 0.967   | -0.008 (-0.026,0.009)         | 0.365   |
| <b>Blood pressure</b>                                  |             |                               |         |                               |         |                               |         |
| Systolic BP                                            | 12776       | -0.005 (-0.021,0.012)         | 0.581   | -0.015 (-0.031,0)             | 0.047   | -0.02 (-0.035,-0.004)         | 0.012   |
| Diastolic BP                                           | 12770       | -0.004 (-0.021,0.014)         | 0.696   | -0.008 (-0.024,0.009)         | 0.372   | -0.007 (-0.023,0.01)          | 0.432   |
| Pulse pressure                                         | 12770       | -0.003 (-0.019,0.013)         | 0.695   | -0.015 (-0.031,0)             | 0.049   | -0.022 (-0.037,-0.007)        | 0.005   |
| <b>Lung function</b>                                   |             |                               |         |                               |         |                               |         |
| FEV1                                                   | 11826       | 0.07 (0.059,0.082)            | < 0.001 | 0.143 (0.132,0.154)           | < 0.001 | 0.079 (0.068,0.09)            | < 0.001 |
| FVC                                                    | 11826       | 0.09 (0.078,0.102)            | < 0.001 | 0.172 (0.161,0.183)           | < 0.001 | 0.1 (0.088,0.111)             | < 0.001 |
| FEV1/FVC                                               | 11768       | -0.049 (-0.066,-0.031)        | < 0.001 | -0.063 (-0.08,-0.046)         | < 0.001 | -0.047 (-0.064,-0.03)         | < 0.001 |
| <b>Lipid measures</b>                                  |             |                               |         |                               |         |                               |         |
| Total cholesterol                                      | 12776       | -0.025 (-0.042,-0.007)        | 0.007   | -0.027 (-0.044,-0.01)         | 0.002   | -0.022 (-0.039,-0.005)        | 0.011   |
| HDL cholesterol                                        | 12775       | 0.009 (-0.009,0.027)          | 0.326   | -0.02 (-0.037,-0.003)         | 0.022   | -0.006 (-0.023,0.011)         | 0.461   |
| LDL cholesterol                                        | 12512       | -0.023 (-0.041,-0.005)        | 0.014   | -0.023 (-0.04,-0.005)         | 0.011   | -0.019 (-0.037,-0.002)        | 0.029   |
| Triglycerides                                          | 12776       | -0.025 (-0.043,-0.008)        | 0.005   | -0.011 (-0.027,0.006)         | 0.215   | -0.011 (-0.028,0.006)         | 0.202   |
| <b>Glycemic traits</b>                                 |             |                               |         |                               |         |                               |         |
| Glucose, fasting                                       | 12775       | 0.006 (-0.012,0.024)          | 0.535   | 0.01 (-0.007,0.027)           | 0.267   | 0 (-0.017,0.017)              | 0.992   |
| Glucose, 2h-OGTT                                       | 10493       | -0.019 (-0.038,0)             | 0.050   | -0.04 (-0.058,-0.022)         | < 0.001 | -0.027 (-0.045,-0.009)        | 0.003   |
| Insulin, fasting                                       | 12737       | 0.008 (-0.011,0.027)          | 0.403   | 0.016 (-0.001,0.034)          | 0.071   | 0.004 (-0.014,0.022)          | 0.665   |
| Insulin, 2h-OGTT                                       | 10476       | -0.032 (-0.052,-0.012)        | 0.001   | -0.05 (-0.069,-0.031)         | < 0.001 | -0.036 (-0.055,-0.017)        | < 0.001 |
| HOMA-IR 12736                                          |             | 0.009 (-0.01,0.027)           | 0.351   | 0.018 (0,0.035)               | 0.048   | 0.003 (-0.015,0.021)          | 0.741   |
| Hemoglobin A1c                                         | 12731       | 0.005 (-0.012,0.022)          | 0.564   | 0.012 (-0.005,0.028)          | 0.155   | -0.001 (-0.018,0.015)         | 0.879   |
| <b>Inflammation, kidney, peripheral artery disease</b> |             |                               |         |                               |         |                               |         |
| hsCRP                                                  | 12774       | 0.002 (-0.016,0.021)          | 0.798   | -0.022 (-0.04,-0.005)         | 0.011   | -0.022 (-0.04,-0.005)         | 0.011   |
| eGFR                                                   | 12687       | -0.008 (-0.022,0.006)         | 0.246   | -0.033 (-0.046,-0.02)         | < 0.001 | -0.021 (-0.035,-0.008)        | 0.002   |
|                                                        |             | OR (95% CI) <sup>a</sup>      | P-value | OR (95% CI) <sup>a</sup>      | P-value | OR (95% CI) <sup>a</sup>      | P-value |
| ABI>1 vs ABI ≤0.9                                      | 6114        | 0.89 (0.8,0.99)               | 0.028   | 0.87 (0.79,0.97)              | 0.009   | 0.98 (0.88,1.09)              | 0.706   |
| ABI>1 vs ABI ≤1                                        | 7491        | 0.9 (0.85,0.96)               | 0.001   | 0.85 (0.804,0.899)            | < 0.001 | 0.94 (0.89,1)                 | 0.033   |

Supplementary table 7: **Associations of sensitivity analysis PRSs with cardiometabolic traits in the HCHS/SOL** (men and women combined). PRS: polygenic risk score; CI: confidence interval; BMI: body mass index; FEV1: forced expiratory volume in 1 second; FVC: forced vital capacity; HDL: high-density lipoprotein; LDL: low-density lipoprotein; 2h-OGTT: 2-h post-oral glucose tolerance test; HOMA-IR: homeostatic model assessment of insulin resistance; hsCRP: high sensitivity C-reactive protein; eGFR: estimated glomerular filtration rate; OR: odds ratio.

<sup>a</sup> Effects are for a one (1) standard deviation (SD) increase in each PRS.
